# Supplementary material for: Which Genetics Variants in DNase-Seq Footprints Are More Likely to Alter Binding?
Source: PLoS Genet. 2016 Feb 22;12(2):e1005875. doi: 10.1371/journal.pgen.1005875 (PMC4764260; doi:10.1371/journal.pgen.1005875)
Supplement: S1 File — Each row is a specific SNP / TF motif / cell type combination. Columns 1-3, bed-formatted SNP position (0-based); 4, motif ID; 5, log ratio between the prior log odds of binding for each allele; 6, prior log odds of binding for the reference allele; 7 prior log odds of binding for the alternate allele, 8 cell type. (BGZ) [file pgen.1005875.s002.tab.bgz]

chr1	10582	10583	PBM0203	17.4069474065713	-2.59688894448981	-3.79210901448980	UwDnaseLncap
chr1	10582	10583	PBM0203	12.4475288641001	-2.59475314886636	-3.78997321886636	UwDnaseHct116
chr1	10582	10583	PBM0203	10.7910969314686	-2.64523503984656	-3.84045510984656	UwDnaseGm12865
chr1	10582	10583	PBM0203	5.9901066178808	-1.08275129492267	-2.27797136492267	EpiUwRmapDNaseH9.Cell.Line.SRX121239
chr1	10582	10583	PBM0203	11.8016356014406	-0.825591248222736	-2.02081131822274	EpiUwRmapDNaseH9.Cell.Line.SRX121238
chr1	10582	10583	PBM0203	7.04508550199045	-2.15835276490602	-3.35357283490602	EpiUwRmapDNaseFetal.Brain.SRX027076
chr1	13301	13302	M01249	4.24318594891595	-3.41236278095897	2.32486046904103	OpenChromDnaseHpde6e6e7
chr1	13301	13302	M01249	5.19210337215546	-5.37528973216366	0.361933517836341	EpiUwRmapDNaseFetal.Spinal.Cord.SRX214047
chr1	13956	13957	M01572	-1.02141037187823	5.87287585346727	-0.93750343653273	OpenChromDnaseUrotsa
chr1	13956	13957	M01572	-0.192602529810166	4.91923069720448	-1.89114859279552	OpenChromDnaseMcf7Hypoxlaccon
chr1	13956	13957	M01733	4.4236640792276	-5.86081484650779	0.646003713492208	OpenChromDnaseIshikawaTam10030
chr1	13979	13980	MA0099.2	7.30400363054948	-1.33463655137762	-1.61855370137762	UwDgfT47d
chr1	13979	13980	M00821	11.4052441759273	-3.5377036698463	-5.0053360998463	UwDgfT47d
chr1	13979	13980	M01267	4.19846644095358	0.795868981814321	-4.66281479818568	UwDgfSkmc
chr1	13979	13980	M00926	4.19536927201842	0.825053474878226	-4.62923371512178	UwDgfSkmc
chr1	13979	13980	MA0099.2	8.93462595459086	0.161755097126260	-0.122162052873740	UwDgfSaec
chr1	13979	13980	M01267	10.0447811256744	0.72026678011389	-4.73841699988611	UwDgfSaec
chr1	13979	13980	M00926	10.0422393457175	0.753307226274416	-4.70097996372559	UwDgfSaec
chr1	13979	13980	M00821	10.9161216992724	-1.49072209559600	-2.958354525596	UwDgfSaec
chr1	13979	13980	MA0099.2	4.34712368740825	0.553585833038627	0.269668683038626	UwDgfHmf
chr1	13979	13980	M01267	4.77102413804954	0.912568388528546	-4.54611539147145	UwDgfHmf
chr1	13979	13980	M00926	4.76690145693597	0.941960755692035	-4.51232643430797	UwDgfHmf
chr1	13979	13980	MA0099.2	6.6823139000358	-0.319867956520708	-0.603785106520709	UwDgfHasp
chr1	13979	13980	M01267	7.8277724436883	0.192895112369721	-5.26578866763028	UwDgfHasp
chr1	13979	13980	M00926	7.82361081680909	0.21044954451755	-5.24383764548245	UwDgfHasp
chr1	13979	13980	M00821	11.4901612656732	-1.72062565322730	-3.1882580832273	UwDgfHasp
chr1	13979	13980	M01267	4.76912572774103	-0.0146853022948434	-5.47336908229484	UwDgfHah
chr1	13979	13980	M00926	4.76450639199195	-0.000758347728510245	-5.45504553772851	UwDgfHah
chr1	13979	13980	M01572	-1.02141037187823	5.87287585346727	6.09580999346727	OpenChromDnaseUrotsa
chr1	13979	13980	M01572	-0.192602529810166	4.91923069720448	5.14216483720449	OpenChromDnaseMcf7Hypoxlaccon
chr1	13979	13980	MA0099.2	13.4317729338657	-0.101910637684169	-0.385827787684169	OpenChromDnaseHmec
chr1	13979	13980	M01267	14.6569819123930	0.0884409897493672	-5.37024279025063	OpenChromDnaseHmec
chr1	13979	13980	M00926	14.6889112690152	0.083767954668751	-5.37051923533125	OpenChromDnaseHmec
chr1	13979	13980	M00821	11.8470441818373	-1.78797710011698	-3.25560953011697	OpenChromDnaseHmec
chr1	13979	13980	PBM0054	7.7720990805658	-2.22299756269988	-5.00835464269988	EpiUwRmapDNaseFetal.Thymus.SRX201838
chr1	13979	13980	M01512	7.73736537147036	-2.38226151341216	-5.17105092341216	EpiUwRmapDNaseFetal.Thymus.SRX201838
chr1	13979	13980	M00821	8.13897033396498	-2.84396814968952	-4.31160057968951	EpiUwRmapDNaseFetal.Thymus.SRX201838
chr1	13979	13980	M01267	6.37135554755172	-0.209323687076544	-5.66800746707654	EpiUwRmapDNaseFetal.Spinal.Cord.SRX214047
chr1	13979	13980	M00926	6.31167366701929	-0.195509043847014	-5.64979623384702	EpiUwRmapDNaseFetal.Spinal.Cord.SRX214047
chr1	13979	13980	M00821	8.89753214496276	-3.19717034817629	-4.66480277817628	EpiUwRmapDNaseFetal.Lung.SRX062368
chr1	13979	13980	M00821	6.82568380895333	-2.07140190228547	-3.53903433228547	EpiUwRmapDNaseFetal.Lung.SRX026925
chr1	13979	13980	MA0099.2	7.38633939195797	-1.17308363828895	-1.45700078828895	EpiUwRmapDNaseFetal.Lung.Left.SRX089276
chr1	13979	13980	M00821	7.91440927543346	-2.79385964946522	-4.26149207946521	EpiUwRmapDNaseFetal.Lung.Left.SRX089276
chr1	52057	52058	PBM0079	5.33307954626524	-4.71131858839833	0.469765231601668	UwDgfHuvec
chr1	52057	52058	M00227	6.33699802911521	-0.371988795876296	-6.7408627358763	UwDgfHuvec
chr1	52057	52058	PBM0079	2.12721267922519	-2.56442866807444	2.61665515192556	OpenChromDnaseUrotsa
chr1	52057	52058	PBM0079	3.37839036140728	-2.67606552599567	2.50501829400433	OpenChromDnaseUrothel
chr1	52057	52058	PBM0079	5.62580324479754	-3.56542622658668	1.61565759341332	OpenChromDnaseNaivebcell
chr1	52057	52058	PBM0079	5.0948391018042	-3.54041300815709	1.64067081184291	OpenChromDnaseMcf7Ctcfshrna
chr1	52057	52058	PBM0079	3.42306112644516	-2.65789261768767	2.52319120231233	OpenChromDnaseHpde6e6e7
chr1	52057	52058	PBM0079	4.4779916030054	-2.17167671871775	3.00940710128225	OpenChromDnaseHek293t
chr1	52057	52058	PBM0079	1.98177332993564	-2.27451641341164	2.90656740658835	OpenChromDnaseGm19240
chr1	52057	52058	PBM0079	3.68188896868045	-3.38448958690299	1.79659423309701	OpenChromDnaseGcbcell
chr1	52057	52058	PBM0079	3.79639601333167	-3.05618254535252	2.12490127464748	OpenChromDnaseEcc1Est10nm30m
chr1	52057	52058	PBM0079	3.35303114493569	-3.45880665401878	1.72227716598122	OpenChromDnaseEcc1Dm002p1h
chr1	52057	52058	PBM0079	3.63139365113194	-2.43240055376273	2.74868326623727	OpenChromDnaseCll
chr1	52057	52058	PBM0079	7.5730212908224	-5.22742111669127	-0.0463372966912736	EpiUwRmapDNaseFetal.Thymus.SRX201838
chr1	52057	52058	M01957	7.48180034454845	-6.94338887461378	-1.68042809461378	EpiUwRmapDNaseFetal.Thymus.SRX201838
chr1	52057	52058	M01511	7.6510384846911	-7.56330497922552	-2.25947897922552	EpiUwRmapDNaseFetal.Thymus.SRX201838
chr1	52143	52144	M01408	3.84525668072654	3.68299261657200	3.189480586572	OpenChromDnaseUrothel
chr1	52143	52144	M01408	4.47622546365757	2.90038714232741	2.40687511232741	OpenChromDnaseT47dEst10nm30m
chr1	52143	52144	M01408	2.69516308843895	2.60393813098194	2.11042610098194	OpenChromDnaseIpsnihi11
chr1	52143	52144	M01408	1.78641731027369	3.35881122437167	2.86529919437167	OpenChromDnaseIpscwru1
chr1	52143	52144	M01408	3.79875991614904	3.32444966630982	2.83093763630983	OpenChromDnaseHpde6e6e7
chr1	52143	52144	M01408	1.47389815877432	3.44821109945741	2.95469906945741	OpenChromDnaseH9es
chr1	52143	52144	M01408	3.33369427936290	2.83058621792132	2.33707418792132	OpenChromDnaseFibropag20443
chr1	52143	52144	M01408	2.96236404365988	2.99230237378056	2.49879034378056	OpenChromDnaseFibroblgm03348Lentimyod
chr1	52143	52144	M01408	3.30587055170043	2.74156723491434	2.24805520491434	OpenChromDnaseFibroblgm03348Lenticon
chr1	52143	52144	M01408	4.72519404180182	3.08330864229387	2.58979661229387	OpenChromDnaseEcc1Est10nm30m
chr1	52143	52144	M01408	4.27581210529709	2.53081790155576	2.03730587155577	OpenChromDnaseEcc1Dm002p1h
chr1	52143	52144	M01408	2.36751231359553	3.02667627252284	2.53316424252284	EpiUwRmapDNaseFetal.Intestine.Large.SRX204363
chr1	52184	52185	M01408	3.84525668072654	3.68299261657200	3.68299261657200	OpenChromDnaseUrothel
chr1	52184	52185	M01408	4.47622546365757	2.90038714232741	2.90038714232741	OpenChromDnaseT47dEst10nm30m
chr1	52184	52185	M01408	2.69516308843895	2.60393813098194	2.60393813098194	OpenChromDnaseIpsnihi11
chr1	52184	52185	M01408	1.78641731027369	3.35881122437167	3.35881122437167	OpenChromDnaseIpscwru1
chr1	52184	52185	M01408	3.79875991614904	3.32444966630982	3.32444966630982	OpenChromDnaseHpde6e6e7
chr1	52184	52185	M01408	1.47389815877432	3.44821109945741	3.44821109945741	OpenChromDnaseH9es
chr1	52184	52185	M01408	3.33369427936290	2.83058621792132	2.83058621792132	OpenChromDnaseFibropag20443
chr1	52184	52185	M01408	2.96236404365988	2.99230237378056	2.99230237378056	OpenChromDnaseFibroblgm03348Lentimyod
chr1	52184	52185	M01408	3.30587055170043	2.74156723491434	2.74156723491434	OpenChromDnaseFibroblgm03348Lenticon
chr1	52184	52185	M01408	4.72519404180182	3.08330864229387	3.08330864229387	OpenChromDnaseEcc1Est10nm30m
chr1	52184	52185	M01408	4.27581210529709	2.53081790155576	2.53081790155576	OpenChromDnaseEcc1Dm002p1h
chr1	52184	52185	M01408	2.36751231359553	3.02667627252284	3.02667627252284	EpiUwRmapDNaseFetal.Intestine.Large.SRX204363
chr1	52237	52238	M01408	3.84525668072654	2.28061405657200	0.752613406571998	OpenChromDnaseUrothel
chr1	52237	52238	M01408	4.47622546365757	1.49800858232741	-0.0299920676725929	OpenChromDnaseT47dEst10nm30m
chr1	52237	52238	M01408	2.65757799687667	1.99423316164827	0.466232511648268	OpenChromDnaseMedullod341
chr1	52237	52238	M01408	4.0018872632763	1.20155957098194	-0.326441079018057	OpenChromDnaseIpsnihi11
chr1	52237	52238	M01408	3.23062796197058	1.95643266437167	0.428432014371671	OpenChromDnaseIpscwru1
chr1	52237	52238	M01408	3.79875991614904	1.92207110630983	0.394070456309827	OpenChromDnaseHpde6e6e7
chr1	52237	52238	M01408	4.8797592383215	1.42820765792132	-0.0997929920786813	OpenChromDnaseFibropag20443
chr1	52237	52238	M01408	3.08552862361076	1.65100947491003	0.123008824910031	OpenChromDnaseFibropag08396
chr1	52237	52238	M01408	3.30587055170043	1.33918867491434	-0.188811975085660	OpenChromDnaseFibroblgm03348Lenticon
chr1	52237	52238	M01408	4.72519404180182	1.68093008229387	0.152929432293869	OpenChromDnaseEcc1Est10nm30m
chr1	52237	52238	M01408	6.12151085869337	1.12843934155577	-0.399561308444234	OpenChromDnaseEcc1Dm002p1h
chr1	53233	53234	MA0133.1	5.50512881680143	0.765174398925563	0.0733208189255627	OpenChromDnaseEcc1Dm002p1h
chr1	55298	55299	M01282	8.83970230491703	-8.73841454312327	-1.60493291312327	UwDgfHuvec
chr1	55393	55394	M01843	9.55030709692278	-5.16951955568679	-2.77706278568679	UwDgfHuvec
chr1	57951	57952	M00696	5.44994952608829	0.384194147365378	-19.3452970626346	OpenChromDnaseNaivebcell
chr1	60725	60726	PBM0083	6.3002421410875	-1.25772389217663	-20.8233760421766	UwDgfHuvec
chr1	61742	61743	M00097	5.42205834220487	-7.19762569551985	-0.123177765519848	OpenChromDnaseCerebellumoc
chr1	63670	63671	M01700	7.0227270260942	-0.974211413597383	-20.7064597735974	OpenChromDnaseUrotsaUt189
chr1	63670	63671	M01186	6.2146812230577	-1.50269569651413	-2.02997266651413	EpiUwRmapDNaseFetal.Intestine.Large.SRX204363
chr1	63670	63671	M00017	6.21664713373604	-1.14905980729441	-3.01562461729441	EpiUwRmapDNaseFetal.Intestine.Large.SRX204363
chr1	66161	66162	M01504	0.27860205107072	8.20819416292318	8.62622760292319	UwDnaseWi38Ohtam
chr1	66161	66162	M01504	0.0354023051315787	9.80373604344898	10.221769483449	UwDnaseWerirb1
chr1	66161	66162	M01532	0.580984452739358	7.83569652633559	8.57087148633559	UwDnaseTh2wb33676984
chr1	66161	66162	M01504	0.445680698379874	10.0524417565672	10.4704751965672	UwDnaseTh2wb33676984
chr1	66161	66162	M01504	0.882133361150019	11.1068423158826	11.5248757558826	UwDnaseTh1wb33676984
chr1	66161	66162	M01532	1.77590053521511	7.84118172055699	8.56179876055699	UwDnaseTh1
chr1	66161	66162	M01532	0.851859132966188	7.48201558733918	8.20263262733918	UwDnaseTh17
chr1	66161	66162	M01504	2.17721521155909	10.4544441146132	10.8724775546132	UwDnaseTh17
chr1	66161	66162	M01532	0.296335354163433	6.7261651206924	7.44679060259299	UwDnaseT47d
chr1	66161	66162	M01504	-0.0641530219966214	9.07353311047644	9.49156655047644	UwDnaseT47d
chr1	66161	66162	M01532	0.990037076298904	7.04194177635974	7.76255881635974	UwDnaseSknshra
chr1	66161	66162	M01504	0.633190852403914	9.5693656571488	9.9873990971488	UwDnaseSknshra
chr1	66161	66162	M01504	1.29613517716462	10.1869434326007	10.6049768726008	UwDnaseSknmc
chr1	66161	66162	M01532	0.19917292608352	4.76091698399194	5.48153402399194	UwDnaseSkmc
chr1	66161	66162	M01532	0.411591280251741	7.08989983205787	7.82507479205787	UwDnaseSaec
chr1	66161	66162	M01504	0.348545982502401	9.10771284083767	9.52574628083767	UwDnaseSaec
chr1	66161	66162	M01532	0.714990835951312	5.74330612335976	6.46392316335976	UwDnaseRpmi7951
chr1	66161	66162	M01532	1.16159196424678	8.36327915504116	9.09845411504116	UwDnasePrec
chr1	66161	66162	M01504	1.15645976926135	10.9546068568901	11.3726402968901	UwDnasePrec
chr1	66161	66162	M01532	0.513043144717813	7.83631199027853	8.57148695027852	UwDnasePanc1
chr1	66161	66162	M01504	0.456703441217542	10.0557434220052	10.4737768620052	UwDnasePanc1
chr1	66161	66162	M01532	-0.06410147082026	8.26506969555226	9.00024465555225	UwDnaseNt2d1
chr1	66161	66162	M01504	-0.191712089660593	10.7808962085166	11.1989296485166	UwDnaseNt2d1
chr1	66161	66162	M01532	0.449465654790401	5.86828952797543	6.58890656797544	UwDnaseNhlf
chr1	66161	66162	M01504	0.339939812198281	8.2028688316386	8.6209022716386	UwDnaseNhlf
chr1	66161	66162	M01532	1.06004853109334	7.88324706309859	8.61842202309858	UwDnaseNhek
chr1	66161	66162	M01504	0.898293364954952	10.1968284214017	10.6148618614017	UwDnaseNhek
chr1	66161	66162	M01532	0.214049439877272	4.87271520809565	5.59333224809565	UwDnaseNhdfad
chr1	66161	66162	M01532	0.860134825411478	7.76595636412075	8.50113132412075	UwDnaseNhbera
chr1	66161	66162	M01504	0.747624577954412	10.4385103420770	10.8565437820770	UwDnaseNhbera
chr1	66161	66162	M01532	0.646761239868283	7.31774317761045	8.05291813761044	UwDnaseNb4
chr1	66161	66162	M01504	0.507676496267777	9.39711312363053	9.81514656363053	UwDnaseNb4
chr1	66161	66162	M01532	0.545340011131836	6.72221716591372	7.44283420591372	UwDnaseMonocd14ro1746
chr1	66161	66162	M01504	0.484042932787481	9.2934766438524	9.7115100838524	UwDnaseMonocd14ro1746
chr1	66161	66162	M01504	0.938192200260573	9.48259115601433	9.90062459601433	UwDnaseMcf7Estctrl0h
chr1	66161	66162	M01532	0.319599412977186	7.29028867888808	8.02546363888808	UwDnaseMcf7Est100nm1h
chr1	66161	66162	M01504	0.0843547794294372	9.4405446213622	9.8585780613622	UwDnaseMcf7Est100nm1h
chr1	66161	66162	M01532	0.00769262770519752	7.87509252536436	8.61026748536436	UwDnaseMcf7
chr1	66161	66162	M01504	-0.063130717420862	10.0646270916960	10.4826605316960	UwDnaseMcf7
chr1	66161	66162	M01532	0.757224462128306	7.36947381064537	8.10464877064537	UwDnaseK562Znfg54a11
chr1	66161	66162	M01504	0.575951270034693	9.59563029363654	10.0136637336365	UwDnaseK562Znfg54a11
chr1	66161	66162	M01532	0.28447381593287	6.43485049979073	7.15546753979073	UwDnaseK562Znff41b2
chr1	66161	66162	M01532	0.45074636330537	6.95209988018086	7.67271692018086	UwDnaseK562Znfe103c6
chr1	66161	66162	M01504	0.429947434312908	9.4220127151191	9.8400461551191	UwDnaseK562Znfe103c6
chr1	66161	66162	M01532	-0.100313036716610	7.61124944974463	8.34642440974462	UwDnaseK562Znfa41c6
chr1	66161	66162	M01504	-0.186776242168311	9.9289649305848	10.3469983705848	UwDnaseK562Znfa41c6
chr1	66161	66162	M01532	-1.0396084566551	7.61347512806817	8.34865008806816	UwDnaseK562Znf4c50c4
chr1	66161	66162	M01504	-0.735010575700918	10.2309610079977	10.6489944479977	UwDnaseK562Znf4c50c4
chr1	66161	66162	M01504	0.0154446133364328	10.5873295876278	11.0053630276278	UwDnaseJurkat
chr1	66161	66162	M01532	0.976051632389044	7.68632439662358	8.42149935662357	UwDnaseHuvec
chr1	66161	66162	M01504	0.758079133927822	9.76917589931475	10.1872093393148	UwDnaseHuvec
chr1	66161	66162	M01532	0.538945040974795	6.09704355530115	6.81766059530115	UwDnaseHsmm
chr1	66161	66162	M01532	0.583118370734155	7.0678377107245	7.8030126707245	UwDnaseHs5
chr1	66161	66162	M01532	-0.100171652194387	7.97339246764777	8.70856742764776	UwDnaseHre
chr1	66161	66162	M01504	-0.235507647497368	10.0566134141344	10.4746468541344	UwDnaseHre
chr1	66161	66162	M01504	0.287763587199152	8.8630185401163	9.2810519801163	UwDnaseHrce
chr1	66161	66162	M01532	0.276608807034791	9.5482214133323	10.2833963733323	UwDnaseHpaec
chr1	66161	66162	M01504	0.352600255981088	10.9598522446266	11.3778856846266	UwDnaseHpaec
chr1	66161	66162	M01532	0.32664833124727	7.04849471858293	7.76911175858293	UwDnaseHnpce
chr1	66161	66162	M01504	0.289791230112314	9.0629394449885	9.4809728849885	UwDnaseHnpce
chr1	66161	66162	M01504	-0.254578004342583	9.02366381885133	9.44169725885133	UwDnaseHmveclly
chr1	66161	66162	M01532	1.02323002249341	7.69574220733387	8.43091716733387	UwDnaseHmveclbl
chr1	66161	66162	M01504	0.924580955055717	9.90110303031793	10.3191364703179	UwDnaseHmveclbl
chr1	66161	66162	M01532	-0.0994497772873122	8.90152167721004	9.63669663721003	UwDnaseHmvecdneo
chr1	66161	66162	M01504	-0.292045846210767	10.4864913996973	10.9045248396973	UwDnaseHmvecdneo
chr1	66161	66162	M01504	0.627145113961888	9.46944450587518	9.88747794587518	UwDnaseHmvecdlyneo
chr1	66161	66162	M01532	0.0265983200483175	6.38461775135242	7.10523479135242	UwDnaseHmvecdlyad
chr1	66161	66162	M01504	-0.129148262553166	8.58580050025	9.00383394025	UwDnaseHmvecdlyad
chr1	66161	66162	M01532	1.26616950108473	7.25810626470929	7.99328122470928	UwDnaseHmvecdblneo
chr1	66161	66162	M01532	-0.127830151976960	6.09635013523978	6.81696717523978	UwDnaseHmvecdblad
chr1	66161	66162	M01532	0.590309419287826	9.22422753066085	9.95940249066085	UwDnaseHmvecdad
chr1	66161	66162	M01504	0.916322527751618	11.6972453714548	12.1237239314548	UwDnaseHmvecdad
chr1	66161	66162	M01504	-1.83327277972316	9.34922325157572	9.76725669157572	UwDnaseHmec
chr1	66161	66162	M01532	0.373050765134394	6.45286265156938	7.17347969156938	UwDnaseHl60
chr1	66161	66162	M01504	0.337138267233968	8.86060122743327	9.27863466743328	UwDnaseHl60
chr1	66161	66162	M01532	-0.879292790159452	7.82676398481496	8.56193894481495	UwDnaseHgf
chr1	66161	66162	M01504	-0.879248351896369	9.92421341957577	10.3422468595758	UwDnaseHgf
chr1	66161	66162	M01532	-0.839334262704062	7.75003124719806	8.48520620719805	UwDnaseHffmyc
chr1	66161	66162	M01532	0.512329279445112	6.71522603193312	7.44732632326042	UwDnaseHepg2
chr1	66161	66162	M01504	0.370867713354528	9.1027273955224	9.5207608355224	UwDnaseHepg2
chr1	66161	66162	M01532	-0.690308679553575	6.58487880141153	7.30549584141153	UwDnaseHee
chr1	66161	66162	M01504	0.801669905442395	9.7450723853931	10.1631058253931	UwDnaseHct116
chr1	66161	66162	M01532	-0.084655466065151	8.46337945816228	9.19855441816228	UwDnaseHconf
chr1	66161	66162	M01504	-0.241856376082390	10.3790923870535	10.7971258270535	UwDnaseHconf
chr1	66161	66162	M01504	0.330795801244676	8.92577008656614	9.34380352656614	UwDnaseHcm
chr1	66161	66162	M01504	0.614812789693588	8.23021592724815	8.64824936724815	UwDnaseHcfaa
chr1	66161	66162	M01532	0.855183190409434	8.15253649581559	8.88771145581558	UwDnaseHbvsmc
chr1	66161	66162	M01504	0.700594447876938	10.6227788790060	11.0408123190060	UwDnaseHbvsmc
chr1	66161	66162	M01532	0.464753231033683	9.55651110502528	10.2916860650253	UwDnaseHbvp
chr1	66161	66162	M01504	0.562327179126441	11.8221398690862	12.2486184290862	UwDnaseHbvp
chr1	66161	66162	M01532	-1.18284037158161	6.26504770605075	6.98566474605075	UwDnaseHbmec
chr1	66161	66162	M01532	0.155462821611676	9.36943199740454	10.0900490374045	UwDnaseHah
chr1	66161	66162	M01504	-0.969107398908846	11.4468233493144	11.8733019093144	UwDnaseHah
chr1	66161	66162	M01532	0.88481709725238	7.76556488072919	8.50073984072918	UwDnaseHac
chr1	66161	66162	M01504	0.737842123475275	10.0559377074671	10.4739711474671	UwDnaseHac
chr1	66161	66162	M01532	-0.215842485864669	11.7911031261306	12.5262780861306	UwDnaseH7esDiffa9d
chr1	66161	66162	M01504	-0.937733174173618	11.7204420701071	12.1384755101071	UwDnaseH7esDiffa9d
chr1	66161	66162	M01532	1.56556948474554	8.03927078351032	8.77444574351032	UwDnaseH7esDiffa5d
chr1	66161	66162	M01504	1.34766135264636	10.8039550820693	11.2219885220693	UwDnaseH7esDiffa5d
chr1	66161	66162	M01504	-0.808487565461474	9.14201447077701	9.56004791077701	UwDnaseH7es
chr1	66161	66162	M01532	0.675374086014926	8.66499249265312	9.40016745265312	UwDnaseGm12878
chr1	66161	66162	M01504	0.637223708443344	10.6034942003792	11.0215276403792	UwDnaseGm12878
chr1	66161	66162	M01532	0.0937236326740145	7.44640257965405	8.17635755233332	UwDnaseGm12865
chr1	66161	66162	M01504	-0.135399059589928	9.61537155577466	10.0334049957747	UwDnaseGm12865
chr1	66161	66162	M01504	0.248669692871317	8.32078004920827	8.73881348920828	UwDnaseGm06990
chr1	66161	66162	M01504	0.127566016279161	9.37102071217222	9.78905415217222	UwDnaseCmk
chr1	66161	66162	M01504	0.324048264883459	10.0763917099452	10.4944251499452	UwDnaseCd4naivewb78495824
chr1	66161	66162	M01504	0.219309012405574	8.64076153085602	9.05879497085602	UwDnaseCd4naivewb11970640
chr1	66161	66162	M01504	0.190893694292754	8.58755759676032	9.00559103676032	UwDnaseCd34mobilized
chr1	66161	66162	M01532	0.60613242401551	9.09751986510586	9.83269482510585	UwDnaseCd20ro01778
chr1	66161	66162	M01504	0.794902272278136	10.6928678382710	11.1109012782710	UwDnaseCd20ro01778
chr1	66161	66162	M01504	0.328640652773629	9.44369779217512	9.86173123217512	UwDnaseCaco2
chr1	66161	66162	M01532	-1.00352605264215	5.2062834625579	5.9269005025579	UwDnaseBj
chr1	66161	66162	M01532	0.248200038447976	6.10477754335116	6.82539458335116	UwDnaseAg09319
chr1	66161	66162	M01532	0.349093531258404	6.16766977142182	6.88828681142182	UwDnaseAg09309
chr1	66161	66162	M01532	0.440916954875775	8.73543758377754	9.47061254377754	UwDnaseAg04450
chr1	66161	66162	M01504	0.46783621808936	10.4641324235022	10.8821658635022	UwDnaseAg04450
chr1	66161	66162	M01532	-0.0564136635744059	7.58342021096588	8.31859517096587	UwDnaseAg04449
chr1	66161	66162	M01504	-0.140443666499849	9.70188178229006	10.1199152222901	UwDnaseAg04449
chr1	66161	66162	M01532	0.549394962003817	8.15452866897564	8.88970362897564	UwDnaseA549
chr1	66161	66162	M01532	2.14977128132634	6.979185972232	7.699803012232	UwDgfTregwb78495824
chr1	66161	66162	M01504	2.00568825211392	9.73519797375885	10.1532314137589	UwDgfTregwb78495824
chr1	66161	66162	M01532	-1.06386017391783	5.83803301658872	6.55865005658872	UwDgfTh2wb54553204
chr1	66161	66162	M01504	-0.873496666861034	8.55929960225469	8.97733304225469	UwDgfTh2wb54553204
chr1	66161	66162	M01532	2.31811928566195	6.90382345755336	7.62444049755336	UwDgfTh2
chr1	66161	66162	M01504	1.76134390068305	9.36887097935399	9.786904419354	UwDgfTh2
chr1	66161	66162	M01532	1.51385565926136	7.03003566334956	7.75065270334956	UwDgfTh1wb33676984
chr1	66161	66162	M01504	1.16643250580556	9.54883871240776	9.96687215240776	UwDgfTh1wb33676984
chr1	66161	66162	M01532	2.30709369837919	7.05437040876171	7.77498744876171	UwDgfTh1
chr1	66161	66162	M01504	2.19282502986734	9.71445166152581	10.1324851015258	UwDgfTh1
chr1	66161	66162	M01504	1.32572904914508	8.50742050077435	8.92545394077435	UwDgfTh17
chr1	66161	66162	M01532	0.938013810702577	6.43710174436453	7.15771878436453	UwDgfT47d
chr1	66161	66162	M01504	0.48304279101031	9.27104042625682	9.68907386625682	UwDgfT47d
chr1	66161	66162	M01532	1.94958110549868	5.96780119797838	6.68841823797838	UwDgfSknshra
chr1	66161	66162	M01504	1.58110764517164	8.7128462696223	9.1308797096223	UwDgfSknshra
chr1	66161	66162	M01504	-0.383078673460202	7.24593764798265	7.66397108798265	UwDgfSkmc
chr1	66161	66162	M01532	-0.398891550514985	5.5375255669958	6.2581426069958	UwDgfNhdfad
chr1	66161	66162	M01532	2.71697510471469	6.26157953476599	6.98219657476599	UwDgfNha
chr1	66161	66162	M01504	2.61043923365557	8.97404668930313	9.39208012930314	UwDgfNha
chr1	66161	66162	M01532	0.647243337291935	6.97899459728527	7.69961163728527	UwDgfNb4
chr1	66161	66162	M01504	0.132177516716618	9.66028568708968	10.0783191270897	UwDgfNb4
chr1	66161	66162	M01532	-0.185278417632282	5.87044888962668	6.59106592962668	UwDgfM059j
chr1	66161	66162	M01504	-0.410620179807944	8.51932064958061	8.93735408958062	UwDgfM059j
chr1	66161	66162	M01532	-1.15437584833680	5.67166391304095	6.39228095304095	UwDgfLhcnm2Diff4d
chr1	66161	66162	M01504	0.677679926019117	10.754673032513	11.1727064725130	UwDgfK562Znfp5
chr1	66161	66162	M01532	0.939549130567694	7.79426576538488	8.51488280538488	UwDgfK562Znfa41c6
chr1	66161	66162	M01504	1.00760965231192	10.6806560914923	11.0986895314923	UwDgfK562Znfa41c6
chr1	66161	66162	M01532	1.48837236725647	7.13000094524236	7.86517590524235	UwDgfK562
chr1	66161	66162	M01532	0.91677486354569	6.88611819220207	7.60673523220207	UwDgfHuvec
chr1	66161	66162	M01504	0.286651042800569	9.80780394485966	10.2258373848597	UwDgfHuvec
chr1	66161	66162	M01532	-0.177533062242141	6.07975861904745	6.80037565904745	UwDgfHsmm
chr1	66161	66162	M01504	-0.473641129529491	8.7555485805183	9.17358202051831	UwDgfHsmm
chr1	66161	66162	M01532	2.42627479104581	7.1260512178823	7.8466682578823	UwDgfHmvech
chr1	66161	66162	M01504	0.0371297031046015	10.4513836130754	10.8694170530754	UwDgfHmvech
chr1	66161	66162	M01532	1.89628014649475	7.02179079905342	7.74240783905342	UwDgfHmvecf
chr1	66161	66162	M01504	1.9636549669582	9.61046138854704	10.0284948285470	UwDgfHmvecf
chr1	66161	66162	M01532	0.467528682499655	6.80243651365668	7.52305355365668	UwDgfHmvecdblad
chr1	66161	66162	M01532	0.479538021995633	7.21936770336865	7.93998474336865	UwDgfHmvecd
chr1	66161	66162	M01504	0.627284678584658	9.77328574380298	10.1913191838030	UwDgfHmvecd
chr1	66161	66162	M01532	0.610241636671094	7.37687000719916	8.09748704719916	UwDgfHmvecb
chr1	66161	66162	M01504	-0.268268162227809	9.5808588758989	9.9988923158989	UwDgfHmvecb
chr1	66161	66162	M01532	1.12732005457469	6.73847395007463	7.45909099007463	UwDgfHgf
chr1	66161	66162	M01504	1.39163718327150	10.03142842986	10.44946186986	UwDgfHgf
chr1	66161	66162	M01532	0.258073910715439	7.61397016515124	8.34914512515123	UwDgfHff
chr1	66161	66162	M01504	0.0993815960561654	10.0571493302140	10.4751827702140	UwDgfHff
chr1	66161	66162	M01532	1.29252961269899	6.7826020445013	7.5032190845013	UwDgfHepg2
chr1	66161	66162	M01504	0.991447383016223	9.65646395351804	10.0744973935180	UwDgfHepg2
chr1	66161	66162	M01532	-1.39986093946720	6.60852297371216	7.32914001371216	UwDgfHee
chr1	66161	66162	M01504	-1.74863510914348	9.18970857090353	9.60774201090354	UwDgfHee
chr1	66161	66162	M01532	0.915771206801125	6.0277333070332	6.7483503470332	UwDgfHcpe
chr1	66161	66162	M01504	-2.34937028459612	9.25645040654011	9.67448384654011	UwDgfHcfaa
chr1	66161	66162	M01532	-0.813311772650896	6.00313086326375	6.72374790326375	UwDgfHasp
chr1	66161	66162	M01504	-0.105485285052018	9.63040254709148	10.0484359870915	UwDgfHasp
chr1	66161	66162	M01532	0.754564965534623	8.76389975511682	9.48451679511682	UwDgfHah
chr1	66161	66162	M01504	0.63990313545192	11.5308795032481	11.9489129432481	UwDgfHah
chr1	66161	66162	M01532	-0.679670805393832	6.08694528838046	6.80756232838046	UwDgfH7es
chr1	66161	66162	M01532	0.340807294833173	6.57536845356077	7.29598549356077	UwDgfGm12865
chr1	66161	66162	M01504	0.209419331711521	9.40807706160994	9.82611050160994	UwDgfGm12865
chr1	66161	66162	M01504	0.9585826053044	9.05621808107398	9.47425152107398	UwDgfGm06990
chr1	66161	66162	M01504	0.613452526629716	9.51196156574585	9.92999500574585	UwDgfCd4naivewb11970640
chr1	66161	66162	M01532	1.8268556483945	7.72315970720301	8.44377674720301	UwDgfCd20ro01778
chr1	66161	66162	M01504	0.267462834880209	11.5333355845118	11.9513690245118	UwDgfCd20ro01778
chr1	66161	66162	M01532	1.88444489070718	7.62260865540026	8.34322569540026	UwDgfA549
chr1	66161	66162	M01504	1.96790761647533	9.8345293841426	10.2525628241426	UwDgfA549
chr1	66161	66162	M01532	1.90773742364597	7.1536651570646	7.8742821970646	OpenChromDnaseUrotsaUt189
chr1	66161	66162	M01504	1.88525556905863	10.0737964107672	10.4918298507672	OpenChromDnaseUrotsaUt189
chr1	66161	66162	M01532	0.374251205759462	7.83913935923517	8.57431431923516	OpenChromDnaseUrotsa
chr1	66161	66162	M01504	0.443240370786999	10.2684951848936	10.6865286248936	OpenChromDnaseUrotsa
chr1	66161	66162	M01532	3.178186796708	6.97445546672748	7.69507250672748	OpenChromDnaseUrothelUt189
chr1	66161	66162	M01504	3.31634998313434	10.1727372712104	10.5907707112104	OpenChromDnaseUrothelUt189
chr1	66161	66162	M01532	1.20206293759621	7.71750075314178	8.45267571314177	OpenChromDnaseUrothel
chr1	66161	66162	M01504	1.21912213778561	10.8239840759382	11.2420175159382	OpenChromDnaseUrothel
chr1	66161	66162	M01532	1.13789501769372	7.00854174111489	7.72915878111489	OpenChromDnaseT47dEst10nm30m
chr1	66161	66162	M01504	0.966628480777481	10.0090001721279	10.4270336121279	OpenChromDnaseT47dEst10nm30m
chr1	66161	66162	M01504	2.64364097648564	9.23895312208715	9.65698656208715	OpenChromDnaseT47d
chr1	66161	66162	M01532	2.0484910439456	6.99527150543863	7.71588854543863	OpenChromDnaseStellate
chr1	66161	66162	M01504	1.84381138126258	9.88183893795805	10.2998723779581	OpenChromDnaseStellate
chr1	66161	66162	M01532	0.680455519680964	7.19841684701359	7.91903388701359	OpenChromDnaseSknsh
chr1	66161	66162	M01504	0.434269274923585	10.0119917039480	10.4300251439480	OpenChromDnaseSknsh
chr1	66161	66162	M01532	0.456674743478619	6.83280127536294	7.55341831536294	OpenChromDnaseRwpe1
chr1	66161	66162	M01504	0.213523679372179	9.7919423165429	10.2099757565429	OpenChromDnaseRwpe1
chr1	66161	66162	M01504	1.51750106076452	9.88839812157453	10.3064315615745	OpenChromDnaseProgfib
chr1	66161	66162	M01504	1.48346889325407	8.94791514887535	9.36594858887535	OpenChromDnaseOlfneurosphere
chr1	66161	66162	M01532	-0.0878610608116109	4.35083240882699	5.07144944882699	OpenChromDnaseNhek
chr1	66161	66162	M01504	0.677117148414254	10.4539687872494	10.8804473472494	OpenChromDnaseNhek
chr1	66161	66162	M01532	2.26021203040357	6.58104802624239	7.30166506624239	OpenChromDnaseNaivebcell
chr1	66161	66162	M01504	2.19758089148002	9.67938311149868	10.0974165514987	OpenChromDnaseNaivebcell
chr1	66161	66162	M01532	2.09528360994016	6.61526583754351	7.33588287754351	OpenChromDnaseMyometr
chr1	66161	66162	M01504	2.06886235939871	9.57558769917253	9.99362113917253	OpenChromDnaseMyometr
chr1	66161	66162	M01532	0.141515376199147	7.03881987109348	7.75943691109348	OpenChromDnaseMonocd14
chr1	66161	66162	M01504	-0.749580041311667	9.84188130936278	10.2599147493628	OpenChromDnaseMonocd14
chr1	66161	66162	M01532	-0.133597847301116	6.71593199646514	7.43654903646514	OpenChromDnaseMel2183
chr1	66161	66162	M01504	-0.29821876569676	9.80874772324467	10.2267811632447	OpenChromDnaseMel2183
chr1	66161	66162	M01532	0.93562091035708	7.26002233220865	7.98063937220865	OpenChromDnaseMedullod341
chr1	66161	66162	M01504	0.749241537267536	10.2588803872287	10.6769138272287	OpenChromDnaseMedullod341
chr1	66161	66162	M01532	2.81851085515026	6.14622639340114	6.86684343340114	OpenChromDnaseMcf7Randshrna
chr1	66161	66162	M01504	2.77463313041926	9.15764195862028	9.57567539862028	OpenChromDnaseMcf7Randshrna
chr1	66161	66162	M01532	1.14621722973563	7.19095522912006	7.92613018912006	OpenChromDnaseMcf7Hypoxlaccon
chr1	66161	66162	M01504	1.24546899005168	9.5180025702034	9.9360360102034	OpenChromDnaseMcf7Hypoxlaccon
chr1	66161	66162	M01504	1.71394735049239	10.0121960511533	10.4302294911533	OpenChromDnaseMcf7Hypoxlac
chr1	66161	66162	M01532	4.22795134679563	6.27440230907075	6.99501934907075	OpenChromDnaseMcf7Ctcfshrna
chr1	66161	66162	M01504	4.39957196501977	9.23399970158931	9.6520331415893	OpenChromDnaseMcf7Ctcfshrna
chr1	66161	66162	M01532	0.765020633550716	9.9884469114067	10.7137712119657	OpenChromDnaseMcf7
chr1	66161	66162	M01504	0.851601367899952	12.7353886817408	13.1534221217408	OpenChromDnaseMcf7
chr1	66161	66162	M01532	0.124834651386037	7.18919830371397	7.90981534371397	OpenChromDnaseLncapAndro
chr1	66161	66162	M01504	-0.0663705228336166	9.82085560950638	10.2388890495064	OpenChromDnaseLncapAndro
chr1	66161	66162	M01532	0.766225098163368	6.59596129808909	7.31657833808909	OpenChromDnaseK562Sahactrl
chr1	66161	66162	M01504	0.545397277804784	9.66689551989998	10.0849289599000	OpenChromDnaseK562Sahactrl
chr1	66161	66162	M01532	1.47710062705219	6.81647094925883	7.53708798925883	OpenChromDnaseK562Saha1u72hr
chr1	66161	66162	M01504	1.40582057238454	9.90528888668744	10.3233223266874	OpenChromDnaseK562Saha1u72hr
chr1	66161	66162	M01532	3.36417811261555	6.45918211280695	7.17979915280695	OpenChromDnaseK562Nabut
chr1	66161	66162	M01504	3.4845471141958	9.44155841588496	9.85959185588496	OpenChromDnaseK562Nabut
chr1	66161	66162	M01532	2.91212292383161	7.03147522087873	7.75209226087873	OpenChromDnaseK562G2mphase
chr1	66161	66162	M01504	2.97742048441801	10.1295740625445	10.5476075025445	OpenChromDnaseK562G2mphase
chr1	66161	66162	M01532	2.14131956365868	7.4938038724379	8.2144209124379	OpenChromDnaseK562G1phase
chr1	66161	66162	M01504	2.06725726142714	10.6916669601063	11.1097004001063	OpenChromDnaseK562G1phase
chr1	66161	66162	M01532	2.44198559885326	6.63470001684549	7.35531705684549	OpenChromDnaseK562
chr1	66161	66162	M01504	2.47811262043218	9.67828746519362	10.0963209051936	OpenChromDnaseK562
chr1	66161	66162	M01532	1.78070688059806	6.65047674553376	7.37109378553376	OpenChromDnaseIshikawaTam10030
chr1	66161	66162	M01504	1.68079088204305	9.57747041933438	9.99550385933438	OpenChromDnaseIshikawaTam10030
chr1	66161	66162	M01532	4.07649581690346	6.5605310549275	7.28114809492751	OpenChromDnaseIshikawaEst10nm30m
chr1	66161	66162	M01504	4.07464177931618	9.52310308783338	9.94113652783339	OpenChromDnaseIshikawaEst10nm30m
chr1	66161	66162	M01532	-0.392662229734794	7.13825426493558	7.85887130493558	OpenChromDnaseIpsnihi7
chr1	66161	66162	M01504	-0.798235809545343	10.1966811421619	10.6147145821619	OpenChromDnaseIpsnihi7
chr1	66161	66162	M01532	-0.109323809697698	6.54100495573809	7.26162199573809	OpenChromDnaseIpsnihi11
chr1	66161	66162	M01504	-0.570582764375754	9.47898727705124	9.89702071705124	OpenChromDnaseIpsnihi11
chr1	66161	66162	M01532	-0.950754636383291	7.9797167708135	8.7148917308135	OpenChromDnaseIpscwru1
chr1	66161	66162	M01504	-1.33645082814328	11.2029499397788	11.6294284997788	OpenChromDnaseIpscwru1
chr1	66161	66162	M01532	1.80289701104877	7.04377994221327	7.76439698221327	OpenChromDnaseImr90
chr1	66161	66162	M01504	1.67840394436751	10.1342676616246	10.5523011016246	OpenChromDnaseImr90
chr1	66161	66162	M01532	0.422439739866604	6.52903697107658	7.25250573569492	OpenChromDnaseHuvec
chr1	66161	66162	M01532	-0.157892730960459	7.50045283542957	8.23562779542957	OpenChromDnaseHuh7
chr1	66161	66162	M01504	-0.381406999055229	10.1238294292231	10.5418628692231	OpenChromDnaseHuh7
chr1	66161	66162	M01532	0.974812736283399	7.5056542410596	8.2408292010596	OpenChromDnaseHtr8
chr1	66161	66162	M01504	0.575201202794246	11.0123071571262	11.4387857171262	OpenChromDnaseHtr8
chr1	66161	66162	M01532	2.09522212216840	6.68171419812035	7.40233123812035	OpenChromDnaseHsmmt
chr1	66161	66162	M01532	-0.270532545070961	6.91498951370344	7.63560655370344	OpenChromDnaseHsmmfshd
chr1	66161	66162	M01504	-0.71320962479897	10.0391840004959	10.4572174404959	OpenChromDnaseHsmmfshd
chr1	66161	66162	M01532	-0.27022135326012	7.88414427778665	8.61931923778664	OpenChromDnaseHsmmemb
chr1	66161	66162	M01504	-0.400955658335967	11.2534216853402	11.6799002453402	OpenChromDnaseHsmmemb
chr1	66161	66162	M01532	1.89626206560585	6.70732041117972	7.42793745117972	OpenChromDnaseHsmm
chr1	66161	66162	M01504	1.66139142802081	9.49637940455536	9.91441284455536	OpenChromDnaseHsmm
chr1	66161	66162	M01532	1.32594139756852	7.11617654989264	7.85135150989264	OpenChromDnaseHpde6e6e7
chr1	66161	66162	M01504	1.14674480574245	10.0523226751519	10.4703561151519	OpenChromDnaseHpde6e6e7
chr1	66161	66162	M01504	0.406619605846117	10.7144621119492	11.1409406719492	OpenChromDnaseHepg2
chr1	66161	66162	M01532	3.26717696414038	6.83589883323881	7.55651587323881	OpenChromDnaseHelas3Ifna4h
chr1	66161	66162	M01504	3.21773493488024	9.80111097280365	10.2191444128037	OpenChromDnaseHelas3Ifna4h
chr1	66161	66162	M01532	0.588810092772937	7.72518995257385	8.44580699257385	OpenChromDnaseHek293t
chr1	66161	66162	M01504	0.647270816718756	10.7452892380246	11.1633226780246	OpenChromDnaseHek293t
chr1	66161	66162	M01532	0.738676611502348	6.09734484117450	6.81796188117450	OpenChromDnaseHeartoc
chr1	66161	66162	M01504	0.801491892409189	9.02769424567807	9.44572768567808	OpenChromDnaseHeartoc
chr1	66161	66162	M01532	1.36606025953188	7.33294581673292	8.06812077673292	OpenChromDnaseH9es
chr1	66161	66162	M01504	1.29000015303609	10.4975992801789	10.9240778401789	OpenChromDnaseH9es
chr1	66161	66162	M01532	-0.0444595565873377	7.01424505140174	7.73486209140174	OpenChromDnaseH7es
chr1	66161	66162	M01504	-0.205388393651786	9.89800329295726	10.3160367329573	OpenChromDnaseH7es
chr1	66161	66162	M01532	0.408874116499872	6.57855232992521	7.29916936992521	OpenChromDnaseGm20000
chr1	66161	66162	M01504	0.0629117648055321	9.68719871006608	10.1052321500661	OpenChromDnaseGm20000
chr1	66161	66162	M01532	0.310996593189224	9.67675689218169	10.4119318521817	OpenChromDnaseGm19239
chr1	66161	66162	M01504	0.623551289342458	11.6558456420834	12.0823242020834	OpenChromDnaseGm19239
chr1	66161	66162	M01532	3.77987933861806	6.35254240741438	7.07315944741438	OpenChromDnaseGm13977
chr1	66161	66162	M01504	3.92364217369129	9.50238536982885	9.92041880982885	OpenChromDnaseGm13977
chr1	66161	66162	M01532	0.55337248476028	6.73160217076326	7.45221921076326	OpenChromDnaseGm13976
chr1	66161	66162	M01504	0.185726160944104	9.88488495826163	10.3029183982616	OpenChromDnaseGm13976
chr1	66161	66162	M01504	0.325392064385142	9.98238442109675	10.4004178610967	OpenChromDnaseGm12892
chr1	66161	66162	M01532	3.55034403619391	6.07202662396572	6.79264366396572	OpenChromDnaseGm12878
chr1	66161	66162	M01504	3.5122130423736	8.98455462009838	9.40258806009838	OpenChromDnaseGm12878
chr1	66161	66162	M01532	0.573613685929299	6.46906827659015	7.18968531659015	OpenChromDnaseGm10266
chr1	66161	66162	M01504	-0.00373935652333519	9.56080577848901	9.97883921848901	OpenChromDnaseGm10266
chr1	66161	66162	M01532	1.50342871149663	6.67786110708663	7.39847814708664	OpenChromDnaseGm10248
chr1	66161	66162	M01504	1.32568180370556	9.89075007564578	10.3087835156458	OpenChromDnaseGm10248
chr1	66161	66162	M01532	1.76603808661148	6.64263593473399	7.36325297473399	OpenChromDnaseGliobla
chr1	66161	66162	M01532	1.99240001830301	6.41093077236009	7.13154781236009	OpenChromDnaseGcbcell
chr1	66161	66162	M01504	1.92096782767431	9.38287213165092	9.80090557165093	OpenChromDnaseGcbcell
chr1	66161	66162	M01532	0.868344487984125	6.4988122372706	7.2194292772706	OpenChromDnaseFrontalcortexoc
chr1	66161	66162	M01504	0.649526278314228	9.5874564824532	10.0054899224532	OpenChromDnaseFrontalcortexoc
chr1	66161	66162	M01532	0.643356690362535	6.91586534025123	7.63648238025123	OpenChromDnaseFibropag20443
chr1	66161	66162	M01504	0.604188067099904	9.91984353665834	10.3378769766583	OpenChromDnaseFibropag20443
chr1	66161	66162	M01532	0.336541803228277	6.89081576854236	7.61143280854236	OpenChromDnaseFibropag08396
chr1	66161	66162	M01504	0.274385510818718	9.92475055254809	10.3427839925481	OpenChromDnaseFibropag08396
chr1	66161	66162	M01532	0.649260176498408	6.46148371301605	7.18210075301605	OpenChromDnaseFibropag08395
chr1	66161	66162	M01504	0.250862186019299	9.52975853696108	9.94779197696108	OpenChromDnaseFibropag08395
chr1	66161	66162	M01532	3.24200782876199	7.28076867503787	8.00138571503787	OpenChromDnaseFibroblgm03348Lentimyod
chr1	66161	66162	M01504	3.14511082916516	10.2104888094872	10.6285222494872	OpenChromDnaseFibroblgm03348Lentimyod
chr1	66161	66162	M01532	3.56685287595457	6.92331816401898	7.64393520401898	OpenChromDnaseFibroblgm03348Lenticon
chr1	66161	66162	M01504	3.70679491749284	9.93802393944518	10.3560573794452	OpenChromDnaseFibroblgm03348Lenticon
chr1	66161	66162	M01532	4.25882723216732	7.08088318894727	7.80150022894727	OpenChromDnaseFibroblgm03348
chr1	66161	66162	M01504	4.43470248800387	10.0884604424486	10.5064938824486	OpenChromDnaseFibroblgm03348
chr1	66161	66162	M01532	2.05088961576535	7.04685458166537	7.76747162166537	OpenChromDnaseEcc1Est10nm30m
chr1	66161	66162	M01504	2.00345245074418	10.0680080610294	10.4860415010294	OpenChromDnaseEcc1Est10nm30m
chr1	66161	66162	M01532	5.36878756462643	6.75448416135147	7.47510120135147	OpenChromDnaseEcc1Dm002p1h
chr1	66161	66162	M01504	5.72120766384191	9.83176842426405	10.2498018642641	OpenChromDnaseEcc1Dm002p1h
chr1	66161	66162	M01532	3.14283669285183	6.57306565746877	7.29368269746877	OpenChromDnaseColo829
chr1	66161	66162	M01504	3.16933967319706	9.79215537915282	10.2101888191528	OpenChromDnaseColo829
chr1	66161	66162	M01532	3.5697534473794	6.70888750754785	7.42950454754785	OpenChromDnaseCll
chr1	66161	66162	M01504	3.56406685112581	9.86402153736035	10.2820549773603	OpenChromDnaseCll
chr1	66161	66162	M01532	1.89736713473274	6.48518675865376	7.20580379865376	OpenChromDnaseCerebrumfrontaloc
chr1	66161	66162	M01504	2.03709522283295	9.58707167385852	10.0051051138585	OpenChromDnaseCerebrumfrontaloc
chr1	66161	66162	M01532	0.783144837073077	6.71168164712966	7.43229868712966	OpenChromDnaseCerebellumoc
chr1	66161	66162	M01504	0.559025198480673	9.86517534137007	10.2832087813701	OpenChromDnaseCerebellumoc
chr1	66161	66162	M01532	2.81905083320395	6.6397504696135	7.3603675096135	OpenChromDnaseCd20ro01794
chr1	66161	66162	M01504	2.94928658906706	9.47863897272594	9.89667241272594	OpenChromDnaseCd20ro01794
chr1	66161	66162	M01532	2.16314641917961	8.30298598491585	9.03816094491584	OpenChromDnaseAosmcSerumfree
chr1	66161	66162	M01504	0.0570447596966882	14.4123167720445	14.8355490058364	OpenChromDnaseAosmcSerumfree
chr1	66161	66162	M01532	0.622425421592635	6.59397872415822	7.31459576415822	OpenChromDnaseA549
chr1	66161	66162	M01504	0.314361081147771	9.62372155741369	10.0417549974137	OpenChromDnaseA549
chr1	66161	66162	M01532	0.895089873553843	6.7580991512732	7.4932741112732	EpiUwRmapDNasePenis.Foreskin.Melanocyte.Primary.Cells.SRX201799
chr1	66161	66162	M01504	0.621712639927864	9.14936850638374	9.56740194638374	EpiUwRmapDNasePenis.Foreskin.Melanocyte.Primary.Cells.SRX201799
chr1	66161	66162	M01532	-0.245591228714328	7.67343825927213	8.40861321927213	EpiUwRmapDNasePenis.Foreskin.Melanocyte.Primary.Cells.SRX201794
chr1	66161	66162	M01504	-0.238835888767199	9.7302953721915	10.1483288121915	EpiUwRmapDNasePenis.Foreskin.Melanocyte.Primary.Cells.SRX201794
chr1	66161	66162	M01532	1.74886349686111	8.72687273899623	9.44748977899623	EpiUwRmapDNasePenis.Foreskin.Melanocyte.Primary.Cells.SRX201198
chr1	66161	66162	M01504	1.52415142788610	11.2807345993042	11.6987680393042	EpiUwRmapDNasePenis.Foreskin.Melanocyte.Primary.Cells.SRX201198
chr1	66161	66162	M01504	-0.263865369111947	10.1509282414809	10.5689616814809	EpiUwRmapDNasePenis.Foreskin.Melanocyte.Primary.Cells.SRX089282
chr1	66161	66162	M01532	0.62361815160636	7.1793407992289	7.8999578392289	EpiUwRmapDNasePenis.Foreskin.Keratinocyte.Primary.Cells.SRX201837
chr1	66161	66162	M01532	0.284198131877929	6.4719971448535	7.1926141848535	EpiUwRmapDNasePenis.Foreskin.Keratinocyte.Primary.Cells.SRX100992
chr1	66161	66162	M01504	0.213083747803466	7.86430375339393	8.28233719339393	EpiUwRmapDNasePenis.Foreskin.Keratinocyte.Primary.Cells.SRX100991
chr1	66161	66162	M01532	0.228154571726918	5.69069934669950	6.4113163866995	EpiUwRmapDNasePenis.Foreskin.Keratinocyte.Primary.Cells.SRX100990
chr1	66161	66162	M01532	0.790528343001076	8.16145113700062	8.88206817700062	EpiUwRmapDNasePenis.Foreskin.Fibroblast.Primary.Cells.SRX135564
chr1	66161	66162	M01504	0.532831248652465	10.8370148099778	11.2550482499778	EpiUwRmapDNasePenis.Foreskin.Fibroblast.Primary.Cells.SRX135564
chr1	66161	66162	M01532	0.0784311690367758	5.76571558744199	6.48633262744199	EpiUwRmapDNasePenis.Foreskin.Fibroblast.Primary.Cells.SRX100966
chr1	66161	66162	M01532	-0.258991002932853	6.27281951766115	6.99343655766115	EpiUwRmapDNasePenis.Foreskin.Fibroblast.Primary.Cells.SRX089280
chr1	66161	66162	M01504	-0.466750357435342	8.46205145777056	8.88008489777056	EpiUwRmapDNasePenis.Foreskin.Fibroblast.Primary.Cells.SRX089280
chr1	66161	66162	M01532	-0.332946552316676	7.79996523745587	8.53514019745586	EpiUwRmapDNasePenis.Foreskin.Fibroblast.Primary.Cells.SRX089279
chr1	66161	66162	M01504	-0.777561853519174	9.3089293012966	9.7269627412966	EpiUwRmapDNasePenis.Foreskin.Fibroblast.Primary.Cells.SRX089279
chr1	66161	66162	M01504	-1.54318496067160	10.2892694944391	10.7073029344391	EpiUwRmapDNaseMobilized.CD8.Primary.Cells.SRX100956
chr1	66161	66162	M01532	1.62443619780242	8.09507476288816	8.83024972288815	EpiUwRmapDNaseMobilized.CD56.Primary.Cells.SRX040396
chr1	66161	66162	M01504	1.20496416091919	10.5917627150166	11.0097961550166	EpiUwRmapDNaseMobilized.CD56.Primary.Cells.SRX040396
chr1	66161	66162	M01532	0.271808028221130	10.1150148065332	10.8501897665332	EpiUwRmapDNaseMobilized.CD4.Primary.Cells.SRX100962
chr1	66161	66162	M01504	0.513121108524501	11.5066387967419	11.9331173567419	EpiUwRmapDNaseMobilized.CD4.Primary.Cells.SRX100962
chr1	66161	66162	M01532	0.49348079703077	8.71336195250282	9.44853691250281	EpiUwRmapDNaseMobilized.CD4.Primary.Cells.SRX055155
chr1	66161	66162	M01504	0.434093748219311	10.7255176694137	11.1436096500907	EpiUwRmapDNaseMobilized.CD4.Primary.Cells.SRX055155
chr1	66161	66162	M01504	0.578186750411987	10.0402511936950	10.4582846336950	EpiUwRmapDNaseMobilized.CD4.Primary.Cells.SRX055153
chr1	66161	66162	M01532	0.715472637861694	8.1880064404989	8.92318140049889	EpiUwRmapDNaseMobilized.CD3.Primary.Cells.SRX055152
chr1	66161	66162	M01504	0.521865230053663	10.6411017096918	11.0591351496918	EpiUwRmapDNaseMobilized.CD3.Primary.Cells.SRX055152
chr1	66161	66162	M01532	-0.78571064007399	6.46398141958551	7.1846302944636	EpiUwRmapDNaseMobilized.CD34.Primary.Cells.SRX040374
chr1	66161	66162	M01532	-0.107088414722807	7.70479574472155	8.43997070472155	EpiUwRmapDNaseMobilized.CD34.Primary.Cells.SRX026927
chr1	66161	66162	M01504	-0.158952120306706	10.2662853221255	10.6843187621255	EpiUwRmapDNaseMobilized.CD34.Primary.Cells.SRX026927
chr1	66161	66162	M01504	1.62428520433591	9.48819634926839	9.90622978926839	EpiUwRmapDNaseiPS.DF.197.Cell.Line.SRX040376
chr1	66161	66162	M01532	1.40912265375843	8.8966344366684	9.6318093966684	EpiUwRmapDNaseiPS.DF.1911.Cell.Line.SRX135563
chr1	66161	66162	M01504	1.67997562286868	11.3126634862755	11.7306969262755	EpiUwRmapDNaseiPS.DF.1911.Cell.Line.SRX135563
chr1	66161	66162	M01532	0.959167358080288	6.03838261642415	6.75899965642415	EpiUwRmapDNaseIMR90.Cell.Line.SRX062367
chr1	66161	66162	M01504	-0.623519881355454	9.45703084654486	9.87506428654486	EpiUwRmapDNaseIMR90.Cell.Line.SRX018823
chr1	66161	66162	M01532	0.316557093523443	6.77197207476305	7.49258911476305	EpiUwRmapDNaseIMR90.Cell.Line.SRX018822
chr1	66161	66162	M01504	0.302700076252222	9.07094602145741	9.48897946145741	EpiUwRmapDNaseIMR90.Cell.Line.SRX018822
chr1	66161	66162	M01532	-1.00389198127492	7.24760571523	7.98278067522999	EpiUwRmapDNaseIMR90.Cell.Line.SRX012426
chr1	66161	66162	M01504	-0.486025361623456	9.11318837471713	9.53122181471713	EpiUwRmapDNaseIMR90.Cell.Line.SRX012426
chr1	66161	66162	M01532	0.390814118087292	7.05061421582551	7.7857891758255	EpiUwRmapDNaseIMR90.Cell.Line.SRX012425
chr1	66161	66162	M01532	0.41153759176882	7.9313822260245	8.66655718602449	EpiUwRmapDNaseHeart.SRX201809
chr1	66161	66162	M01504	0.752587051876617	9.7760736080529	10.1941070480529	EpiUwRmapDNaseH1.Derived.Neuronal.Progenitor.Cultured.Cells.SRX134721
chr1	66161	66162	M01504	-0.123066366686969	7.71696934461747	8.13500278461747	EpiUwRmapDNaseH1.Derived.Mesenchymal.Stem.Cells.SRX134722
chr1	66161	66162	M01532	0.725861273540886	7.35419112948184	8.08936608948184	EpiUwRmapDNaseH1.Cell.Line.SRX121242
chr1	66161	66162	M01504	0.54559041982202	9.49235786051642	9.91039130051642	EpiUwRmapDNaseH1.Cell.Line.SRX121242
chr1	66161	66162	M01532	1.46454070103794	6.83692212283473	7.55753916283473	EpiUwRmapDNaseH1.BMP4.Derived.Trophoblast.Cultured.Cells.SRX134724
chr1	66161	66162	M01504	1.12249665465786	9.49962380242575	9.91765724242575	EpiUwRmapDNaseH1.BMP4.Derived.Trophoblast.Cultured.Cells.SRX134724
chr1	66161	66162	M01532	-0.90602919086814	5.84747028369688	6.56808732369688	EpiUwRmapDNaseH1.BMP4.Derived.Trophoblast.Cultured.Cells.SRX121240
chr1	66161	66162	M01504	-0.189714652541584	8.03868992183784	8.45672336183785	EpiUwRmapDNaseH1.BMP4.Derived.Trophoblast.Cultured.Cells.SRX121240
chr1	66161	66162	M01532	0.190127125941217	4.36942968829121	5.09004672829121	EpiUwRmapDNaseFibroblasts.Fetal.Skin.Biceps.Right.SRX121269
chr1	66161	66162	M01532	0.143148459028453	4.78698571050669	5.50760275050669	EpiUwRmapDNaseFibroblasts.Fetal.Skin.Biceps.Left.SRX121271
chr1	66161	66162	M01532	0.600878823479838	6.3162363029909	7.0368533429909	EpiUwRmapDNaseFetal.Thymus.SRX201838
chr1	66161	66162	M01504	1.15813392548797	9.88804121914563	10.3060746591456	EpiUwRmapDNaseFetal.Thymus.SRX201838
chr1	66161	66162	M01504	-0.759989303833362	9.87177006554621	10.2898035055462	EpiUwRmapDNaseFetal.Thymus.SRX201800
chr1	66161	66162	M01532	0.256299627013505	6.66422075377968	7.39939571377967	EpiUwRmapDNaseFetal.Thymus.SRX121253
chr1	66161	66162	M01532	0.0081175418861842	10.5772598612372	11.2982317367503	EpiUwRmapDNaseFetal.Thymus.SRX100968
chr1	66161	66162	M01504	1.54091209681287	11.1581989198760	11.5762323598760	EpiUwRmapDNaseFetal.Thymus.SRX100968
chr1	66161	66162	M01532	1.64162303573916	9.74475723168197	10.4653742716820	EpiUwRmapDNaseFetal.Thymus.SRX089269
chr1	66161	66162	M01504	1.19639490214936	11.9666894690327	12.3847229090327	EpiUwRmapDNaseFetal.Thymus.SRX089269
chr1	66161	66162	M01532	0.241709348745644	9.13785382056825	9.87302878056824	EpiUwRmapDNaseFetal.Thymus.SRX089243
chr1	66161	66162	M01504	0.307854492217302	10.7635283182578	11.1815617582578	EpiUwRmapDNaseFetal.Thymus.SRX089243
chr1	66161	66162	M01504	0.257836950942874	10.2519792196325	10.6700126596325	EpiUwRmapDNaseFetal.Thymus.SRX055201
chr1	66161	66162	M01532	3.02691931654406	5.60395028673262	6.32456732673262	EpiUwRmapDNaseFetal.Thymus.SRX055177
chr1	66161	66162	M01504	-0.0533031515656517	10.9655710855400	11.3836155924900	EpiUwRmapDNaseFetal.Thymus.SRX055177
chr1	66161	66162	M01532	0.663262940943241	8.30432680420629	9.03950176420629	EpiUwRmapDNaseFetal.Thymus.SRX055161
chr1	66161	66162	M01504	0.475282113999128	10.7663946822383	11.1844281222383	EpiUwRmapDNaseFetal.Thymus.SRX055161
chr1	66161	66162	M01532	0.137273806219159	8.19750571587716	8.93268067587715	EpiUwRmapDNaseFetal.Thymus.SRX040399
chr1	66161	66162	M01504	-0.00141308198913698	10.6308814293534	11.0489148693534	EpiUwRmapDNaseFetal.Thymus.SRX040399
chr1	66161	66162	M01532	0.630306376708631	7.61404135556985	8.34921631556985	EpiUwRmapDNaseFetal.Testes.SRX201806
chr1	66161	66162	M01504	0.508652067002458	9.46900264097599	9.88703608097599	EpiUwRmapDNaseFetal.Testes.SRX201806
chr1	66161	66162	M01532	0.385904426686466	6.97370821433514	7.70888317433513	EpiUwRmapDNaseFetal.Testes.SRX121243
chr1	66161	66162	M01504	0.306083239986592	9.74277425985995	10.1608076998599	EpiUwRmapDNaseFetal.Stomach.SRX214043
chr1	66161	66162	M01532	-0.178899182315655	7.36803908162961	8.1032140416296	EpiUwRmapDNaseFetal.Stomach.SRX201818
chr1	66161	66162	M01504	0.389324800589293	9.28512817103326	9.70316161103326	EpiUwRmapDNaseFetal.Stomach.SRX201818
chr1	66161	66162	M01504	1.29021669431313	9.57442423167917	9.99245767167918	EpiUwRmapDNaseFetal.Stomach.SRX201805
chr1	66161	66162	M01532	0.266473471717232	7.36646916998272	8.10164412998272	EpiUwRmapDNaseFetal.Stomach.SRX201194
chr1	66161	66162	M01504	0.214633851336696	9.87915982386355	10.2971932638636	EpiUwRmapDNaseFetal.Stomach.SRX201194
chr1	66161	66162	M01532	0.381029399111867	6.81787837004623	7.55305333004623	EpiUwRmapDNaseFetal.Stomach.SRX121291
chr1	66161	66162	M01532	0.500975551015874	8.36347999523804	9.09865495523803	EpiUwRmapDNaseFetal.Stomach.SRX100995
chr1	66161	66162	M01532	0.156127469471874	9.89714214269528	10.6177591826953	EpiUwRmapDNaseFetal.Stomach.SRX100969
chr1	66161	66162	M01532	0.107639654539526	11.3039118664992	12.0390868264992	EpiUwRmapDNaseFetal.Stomach.SRX089251
chr1	66161	66162	M01504	0.237729516346008	12.4146286078535	12.8411071678535	EpiUwRmapDNaseFetal.Stomach.SRX089251
chr1	66161	66162	M01532	0.0552057447731785	8.29818640568336	9.03336136568336	EpiUwRmapDNaseFetal.Stomach.SRX089241
chr1	66161	66162	M01532	0.456976540657962	7.55809188687268	8.29326684687267	EpiUwRmapDNaseFetal.Stomach.SRX055202
chr1	66161	66162	M01504	0.286061278851548	9.17382603113564	9.59185947113565	EpiUwRmapDNaseFetal.Stomach.SRX055202
chr1	66161	66162	M01532	0.918115298249276	6.04382516424681	6.76444220424681	EpiUwRmapDNaseFetal.Spinal.Cord.SRX214047
chr1	66161	66162	M01504	0.52504099122957	9.778756838279	10.1967902782790	EpiUwRmapDNaseFetal.Spinal.Cord.SRX214047
chr1	66161	66162	M01504	-0.520512521709748	9.15434569963988	9.57237913963988	EpiUwRmapDNaseFetal.Spinal.Cord.SRX201795
chr1	66161	66162	M01532	0.622120946863304	8.31499942118583	9.03561646118584	EpiUwRmapDNaseFetal.Spinal.Cord.SRX100985
chr1	66161	66162	M01504	0.716236197410012	10.9032299200014	11.3212633600014	EpiUwRmapDNaseFetal.Spinal.Cord.SRX100985
chr1	66161	66162	M01532	1.10272006534028	5.32296847231757	6.04358551231757	EpiUwRmapDNaseFetal.Skin.SRX100954
chr1	66161	66162	M01504	0.941962873409384	8.24881876244817	8.66685220244818	EpiUwRmapDNaseFetal.Skin.SRX100954
chr1	66161	66162	M01504	-0.0699723304465465	8.83966200305754	9.25769544305755	EpiUwRmapDNaseFetal.Renal.Pelvis.SRX101014
chr1	66161	66162	M01532	0.897903124801815	8.00771632431008	8.74289128431008	EpiUwRmapDNaseFetal.Renal.Pelvis.SRX100973
chr1	66161	66162	M01504	0.705839095637202	10.3595911094014	10.7776245494015	EpiUwRmapDNaseFetal.Renal.Pelvis.SRX100973
chr1	66161	66162	M01532	0.000227733164517074	13.6570969481862	14.3922719081862	EpiUwRmapDNaseFetal.Renal.Pelvis.SRX089261
chr1	66161	66162	M01504	0.202138709712925	12.4675690701596	12.8940476301596	EpiUwRmapDNaseFetal.Renal.Pelvis.SRX089261
chr1	66161	66162	M01532	0.321655370034962	9.350875715896	10.071492755896	EpiUwRmapDNaseFetal.Renal.Pelvis.SRX055174
chr1	66161	66162	M01504	0.339225262403488	12.6814064551236	13.1078850151236	EpiUwRmapDNaseFetal.Renal.Pelvis.SRX055174
chr1	66161	66162	M01532	0.391144458204508	6.8991865176576	7.6343614776576	EpiUwRmapDNaseFetal.Renal.Pelvis.Right.SRX101004
chr1	66161	66162	M01504	0.275625377893448	9.08158082936892	9.49961426936892	EpiUwRmapDNaseFetal.Renal.Pelvis.Right.SRX101004
chr1	66161	66162	M01532	0.312188887037337	6.57325395445068	7.30842891445067	EpiUwRmapDNaseFetal.Renal.Pelvis.Right.SRX100988
chr1	66161	66162	M01532	0.538303995504975	9.00143409388527	9.73660905388527	EpiUwRmapDNaseFetal.Renal.Pelvis.Right.SRX055182
chr1	66161	66162	M01504	0.516680169850588	11.1754779085036	11.6019564685036	EpiUwRmapDNaseFetal.Renal.Pelvis.Right.SRX055182
chr1	66161	66162	M01532	0.489585858769715	7.373915400236	8.109090360236	EpiUwRmapDNaseFetal.Renal.Pelvis.Left.SRX101001
chr1	66161	66162	M01504	0.303823621943593	9.25453616942112	9.67256960942112	EpiUwRmapDNaseFetal.Renal.Pelvis.Left.SRX101001
chr1	66161	66162	M01532	-0.591762932375092	7.35227971061077	8.08745467061077	EpiUwRmapDNaseFetal.Renal.Cortex.SRX201810
chr1	66161	66162	M01504	-0.81890941033958	9.51855225530953	9.93658569530954	EpiUwRmapDNaseFetal.Renal.Cortex.SRX201810
chr1	66161	66162	M01532	0.597454608004193	7.97517230471793	8.69578934471793	EpiUwRmapDNaseFetal.Renal.Cortex.SRX100972
chr1	66161	66162	M01504	0.135637334547937	8.71814657466252	9.13618001466252	EpiUwRmapDNaseFetal.Renal.Cortex.SRX055193
chr1	66161	66162	M01532	-0.611324874728108	7.2345520206096	7.96972698060959	EpiUwRmapDNaseFetal.Renal.Cortex.Right.SRX100998
chr1	66161	66162	M01532	1.60109343938529	8.63145041856302	9.36662537856301	EpiUwRmapDNaseFetal.Renal.Cortex.Right.SRX055181
chr1	66161	66162	M01504	1.28719929978251	11.2778069995036	11.6958404395036	EpiUwRmapDNaseFetal.Renal.Cortex.Right.SRX055181
chr1	66161	66162	M01532	1.86918382851178	6.42666372894574	7.14728076894574	EpiUwRmapDNaseFetal.Placenta.SRX214046
chr1	66161	66162	M01504	0.871819303452468	9.17088269119352	9.58891613119352	EpiUwRmapDNaseFetal.Placenta.SRX214046
chr1	66161	66162	M01504	0.508251391351223	9.29654996536341	9.71458340536341	EpiUwRmapDNaseFetal.Placenta.SRX201830
chr1	66161	66162	M01532	-0.515943696439197	8.11543542254682	8.85061038254682	EpiUwRmapDNaseFetal.Placenta.SRX089254
chr1	66161	66162	M01504	-0.416758073772046	10.4592192320143	10.8772526720143	EpiUwRmapDNaseFetal.Placenta.SRX089254
chr1	66161	66162	M01532	1.52258692306776	6.01086310036143	6.73148014036143	EpiUwRmapDNaseFetal.Ovary.SRX201793
chr1	66161	66162	M01504	-0.203336786094096	11.4930976758723	11.9195762358723	EpiUwRmapDNaseFetal.Ovary.SRX201793
chr1	66161	66162	M01532	0.167139954864979	6.46138427485172	7.18200131485172	EpiUwRmapDNaseFetal.Muscle.Upper.Limb.Skeletal.SRX055186
chr1	66161	66162	M01532	0.642059005906049	6.01351590381239	6.73413294381239	EpiUwRmapDNaseFetal.Muscle.Trunk.SRX214045
chr1	66161	66162	M01532	1.01046550921046	7.06083351229211	7.7960084722921	EpiUwRmapDNaseFetal.Muscle.Trunk.SRX121290
chr1	66161	66162	M01504	0.747294273027364	9.41021646417111	9.82824990417112	EpiUwRmapDNaseFetal.Muscle.Trunk.SRX121290
chr1	66161	66162	M01532	0.387688812303168	5.94046709226133	6.66108413226133	EpiUwRmapDNaseFetal.Muscle.Trunk.SRX121280
chr1	66161	66162	M01532	0.187628221698105	7.26850383308234	8.00367879308233	EpiUwRmapDNaseFetal.Muscle.Trunk.SRX055197
chr1	66161	66162	M01504	0.165337285492569	8.88335043052676	9.30138387052676	EpiUwRmapDNaseFetal.Muscle.Trunk.SRX055197
chr1	66161	66162	M01532	0.309072355683871	9.7350527483958	10.4556697883958	EpiUwRmapDNaseFetal.Muscle.Lower.Limb.Skeletal.SRX089277
chr1	66161	66162	M01504	0.396642343141139	12.8300095525905	13.2564881125905	EpiUwRmapDNaseFetal.Muscle.Lower.Limb.Skeletal.SRX089277
chr1	66161	66162	M01532	0.251454938203096	6.04673218325187	6.76734922325187	EpiUwRmapDNaseFetal.Muscle.Leg.SRX201820
chr1	66161	66162	M01504	-0.446994959573761	9.4801378634557	9.8981713034557	EpiUwRmapDNaseFetal.Muscle.Leg.SRX201796
chr1	66161	66162	M01532	0.194780184887350	5.64035094184535	6.36096798184535	EpiUwRmapDNaseFetal.Muscle.Leg.SRX121279
chr1	66161	66162	M01532	-0.150429659112614	7.53060415343	8.26577911343	EpiUwRmapDNaseFetal.Muscle.Leg.SRX121252
chr1	66161	66162	M01504	-0.317289098645191	9.40226099681717	9.82029443681717	EpiUwRmapDNaseFetal.Muscle.Leg.SRX121252
chr1	66161	66162	M01504	0.304075689055026	8.50443524430221	8.92246868430221	EpiUwRmapDNaseFetal.Muscle.Leg.SRX101002
chr1	66161	66162	M01504	0.413103514350951	9.65364324788546	10.0716766878855	EpiUwRmapDNaseFetal.Muscle.Leg.SRX100997
chr1	66161	66162	M01532	0.403471519986061	8.55957050478964	9.28018754478964	EpiUwRmapDNaseFetal.Muscle.Leg.SRX055169
chr1	66161	66162	M01504	0.374370107427239	10.5679501863059	10.9859836263059	EpiUwRmapDNaseFetal.Muscle.Leg.SRX055169
chr1	66161	66162	M01532	0.917702922796288	7.2438055130138	7.9644225530138	EpiUwRmapDNaseFetal.Muscle.Back.SRX214042
chr1	66161	66162	M01504	0.599512582407276	9.89189373824371	10.3099271782437	EpiUwRmapDNaseFetal.Muscle.Back.SRX214042
chr1	66161	66162	M01532	-0.506120417640028	6.5285938089323	7.25276153824802	EpiUwRmapDNaseFetal.Muscle.Back.SRX201817
chr1	66161	66162	M01504	-0.296709998080975	8.40478745976566	8.82282089976566	EpiUwRmapDNaseFetal.Muscle.Back.SRX201817
chr1	66161	66162	M01504	0.246059843339026	8.29553429618586	8.71356773618586	EpiUwRmapDNaseFetal.Muscle.Back.SRX121281
chr1	66161	66162	M01532	-0.0584530955235186	7.40339398719375	8.13856894719374	EpiUwRmapDNaseFetal.Muscle.Back.SRX121237
chr1	66161	66162	M01504	0.187627349980175	8.13935552085259	8.55738896085259	EpiUwRmapDNaseFetal.Muscle.Back.SRX101008
chr1	66161	66162	M01504	0.274133651517332	8.65770580207665	9.07573924207665	EpiUwRmapDNaseFetal.Muscle.Back.SRX101003
chr1	66161	66162	M01532	0.481998299248517	7.07601190614767	7.81118686614766	EpiUwRmapDNaseFetal.Muscle.Back.SRX100996
chr1	66161	66162	M01504	0.313706873916090	8.97571931390994	9.39375275390994	EpiUwRmapDNaseFetal.Muscle.Back.SRX100996
chr1	66161	66162	M01532	-0.0235144255653416	7.61741264640978	8.35258760640977	EpiUwRmapDNaseFetal.Muscle.Back.SRX100978
chr1	66161	66162	M01504	-0.28573651955214	9.33443137429991	9.75246481429991	EpiUwRmapDNaseFetal.Muscle.Back.SRX100978
chr1	66161	66162	M01532	0.620163467575139	7.7888416713353	8.5240166313353	EpiUwRmapDNaseFetal.Muscle.Back.SRX100967
chr1	66161	66162	M01532	1.03170215396764	9.05432380230505	9.77494084230505	EpiUwRmapDNaseFetal.Muscle.Back.SRX089274
chr1	66161	66162	M01504	-0.452087381457806	10.3193557764954	10.7373892164954	EpiUwRmapDNaseFetal.Muscle.Back.SRX089274
chr1	66161	66162	M01504	0.686539762059624	10.3874905485774	10.8055239885774	EpiUwRmapDNaseFetal.Muscle.Back.SRX089263
chr1	66161	66162	M01532	0.0927034939317666	9.74038846765135	10.4610115986148	EpiUwRmapDNaseFetal.Muscle.Arm.SRX201836
chr1	66161	66162	M01504	-0.0444879287327709	12.0801470073503	12.4981804473503	EpiUwRmapDNaseFetal.Muscle.Arm.SRX201836
chr1	66161	66162	M01504	0.248325993306935	8.37542781407827	8.79346125407827	EpiUwRmapDNaseFetal.Muscle.Arm.SRX121251
chr1	66161	66162	M01532	0.686967469751835	7.39706759184742	8.13224255184742	EpiUwRmapDNaseFetal.Muscle.Arm.SRX121245
chr1	66161	66162	M01504	0.597247203415463	9.61283447894408	10.0308679189441	EpiUwRmapDNaseFetal.Muscle.Arm.SRX100980
chr1	66161	66162	M01532	0.540500893257558	7.18459691119922	7.91977187119922	EpiUwRmapDNaseFetal.Muscle.Arm.SRX089278
chr1	66161	66162	M01504	0.00998297354245958	9.72638598571508	10.1444194257151	EpiUwRmapDNaseFetal.Muscle.Arm.SRX089273
chr1	66161	66162	M01504	0.240207121241838	12.6444341416608	13.0709127016608	EpiUwRmapDNaseFetal.Muscle.Arm.SRX089265
chr1	66161	66162	M01532	0.258899737496864	9.90869256650256	10.6293096065026	EpiUwRmapDNaseFetal.Muscle.Arm.SRX089262
chr1	66161	66162	M01504	0.317973800003529	13.7925717981426	14.2190503581426	EpiUwRmapDNaseFetal.Muscle.Arm.SRX089262
chr1	66161	66162	M01532	0.224522742087174	8.27577592239106	9.01095088239105	EpiUwRmapDNaseFetal.Muscle.Arm.SRX055199
chr1	66161	66162	M01532	0.487592688761652	8.21754327909102	8.95271823909101	EpiUwRmapDNaseFetal.Muscle.Arm.SRX055170
chr1	66161	66162	M01504	0.391743920743465	9.94349291009918	10.3615263500992	EpiUwRmapDNaseFetal.Muscle.Arm.SRX055170
chr1	66161	66162	M01504	0.449600929394364	9.90829643216718	10.3263298721672	EpiUwRmapDNaseFetal.Lung.SRX040382
chr1	66161	66162	M01532	0.217772560194135	7.40844123282076	8.14361619282076	EpiUwRmapDNaseFetal.Lung.SRX027093
chr1	66161	66162	M01504	0.211565585806966	9.10988367099007	9.52791711099007	EpiUwRmapDNaseFetal.Lung.SRX027093
chr1	66161	66162	M01532	0.294539242982864	6.34525620043932	7.06587324043932	EpiUwRmapDNaseFetal.Lung.SRX027078
chr1	66161	66162	M01532	0.214359808713198	6.67667464117532	7.39729168117533	EpiUwRmapDNaseFetal.Lung.SRX026919
chr1	66161	66162	M01532	0.409524647565815	9.09961453254434	9.82023157254434	EpiUwRmapDNaseFetal.Lung.Right.SRX089266
chr1	66161	66162	M01504	0.693942204620612	10.5402169686619	10.9582504086619	EpiUwRmapDNaseFetal.Lung.Right.SRX089266
chr1	66161	66162	M01532	1.18724632254773	8.96599522237742	9.68661226237742	EpiUwRmapDNaseFetal.Lung.Left.SRX100971
chr1	66161	66162	M01504	-0.288418020740716	10.4176830909972	10.8357165309972	EpiUwRmapDNaseFetal.Lung.Left.SRX100971
chr1	66161	66162	M01532	0.333835516056482	9.42197005799125	10.1425870979912	EpiUwRmapDNaseFetal.Lung.Left.SRX089250
chr1	66161	66162	M01504	0.424428592436016	11.0224201437631	11.4404535837631	EpiUwRmapDNaseFetal.Lung.Left.SRX089250
chr1	66161	66162	M01532	0.346309432065338	9.2933149784143	10.0139320184143	EpiUwRmapDNaseFetal.Lung.Left.SRX055176
chr1	66161	66162	M01504	0.355720695049513	11.1116632861437	11.5381418461437	EpiUwRmapDNaseFetal.Lung.Left.SRX055176
chr1	66161	66162	M01504	0.310081789270043	9.5830784855205	10.0011119255205	EpiUwRmapDNaseFetal.Lung.Left.SRX040384
chr1	66161	66162	M01532	-0.100597294242728	6.48090207759263	7.21607703759263	EpiUwRmapDNaseFetal.Kidney.SRX201196
chr1	66161	66162	M01504	-0.440780206259089	10.8268352191659	11.2533137791659	EpiUwRmapDNaseFetal.Kidney.SRX089260
chr1	66161	66162	M01532	0.231697695685428	8.18739170323467	8.92256666323467	EpiUwRmapDNaseFetal.Kidney.SRX055179
chr1	66161	66162	M01504	0.1472008517012	9.32637513058097	9.74440857058097	EpiUwRmapDNaseFetal.Kidney.SRX026918
chr1	66161	66162	M01532	-1.00103658565497	6.8315328132578	7.5667077732578	EpiUwRmapDNaseFetal.Kidney.Right.SRX201195
chr1	66161	66162	M01504	0.597890430718191	11.0780706606093	11.4961041006093	EpiUwRmapDNaseFetal.Kidney.Right.SRX100976
chr1	66161	66162	M01532	0.385734248906374	8.16095973140306	8.89613469140306	EpiUwRmapDNaseFetal.Kidney.Right.SRX040409
chr1	66161	66162	M01532	0.294681496146815	9.07850839974675	9.81368335974674	EpiUwRmapDNaseFetal.Kidney.Right.SRX040386
chr1	66161	66162	M01504	0.0664749690824722	11.5497640211548	11.9762425811548	EpiUwRmapDNaseFetal.Kidney.Right.SRX040386
chr1	66161	66162	M01504	-0.0337951530552311	10.6116046391064	11.0296380791064	EpiUwRmapDNaseFetal.Kidney.Left.SRX100977
chr1	66161	66162	M01532	1.37171207622328	7.27933479723949	8.01450975723948	EpiUwRmapDNaseFetal.Intestine.Small.SRX100983
chr1	66161	66162	M01504	0.559548753510465	11.1784456627069	11.5964791027069	EpiUwRmapDNaseFetal.Intestine.Small.SRX100983
chr1	66161	66162	M01532	0.00401985453989051	11.8856575732557	12.6208325332557	EpiUwRmapDNaseFetal.Intestine.Small.SRX089268
chr1	66161	66162	M01504	0.308910046672963	11.8031544275470	12.2296329875470	EpiUwRmapDNaseFetal.Intestine.Small.SRX089268
chr1	66161	66162	M01532	1.18153491111661	8.17394011898204	8.90911507898203	EpiUwRmapDNaseFetal.Intestine.Small.SRX089264
chr1	66161	66162	M01504	1.21089206397437	10.4177292586323	10.8357626986323	EpiUwRmapDNaseFetal.Intestine.Small.SRX089264
chr1	66161	66162	M01532	0.380210785837356	8.48923574653681	9.2244107065368	EpiUwRmapDNaseFetal.Intestine.Small.SRX089255
chr1	66161	66162	M01504	0.107020904110588	10.8703072859355	11.2883407259355	EpiUwRmapDNaseFetal.Intestine.Small.SRX089255
chr1	66161	66162	M01532	0.654453936964273	7.8006341910378	8.5358091510378	EpiUwRmapDNaseFetal.Intestine.S
