# Supplementary material for: Which Genetics Variants in DNase-Seq Footprints Are More Likely to Alter Binding?
Source: PLoS Genet. 2016 Feb 22;12(2):e1005875. doi: 10.1371/journal.pgen.1005875 (PMC4764260; doi:10.1371/journal.pgen.1005875)
Supplement: S1 Table — Listed for each sample is the source, the sample, and the number of reads. (XLSX) [file pgen.1005875.s006.xlsx]

## Sheet: Sheet1
Data Cohort	Sample	Number of Reads
Roadmap Epigenomics Project	Breast.vHMEC.SRX081373	31353867
Roadmap Epigenomics Project	Breast.vHMEC.SRX081374	32554290
Roadmap Epigenomics Project	Breast.vHMEC.SRX201197	340130293
Roadmap Epigenomics Project	CD14.Primary.Cells.SRX040416	29229857
Roadmap Epigenomics Project	CD14.Primary.Cells.SRX055167	21328681
Roadmap Epigenomics Project	CD14.Primary.Cells.SRX055205	22986142
Roadmap Epigenomics Project	CD19.Primary.Cells.SRX055156	25757399
Roadmap Epigenomics Project	CD19.Primary.Cells.SRX055157	24159792
Roadmap Epigenomics Project	CD19.Primary.Cells.SRX055171	26107288
Roadmap Epigenomics Project	CD20.Primary.Cells.SRX055164	29914956
Roadmap Epigenomics Project	CD34.Primary.Cells.SRX015226	32750562
Roadmap Epigenomics Project	CD34.Primary.Cells.SRX015227	35550464
Roadmap Epigenomics Project	CD34.Primary.Cells.SRX015228	33051870
Roadmap Epigenomics Project	CD34.Primary.Cells.SRX026915	26058561
Roadmap Epigenomics Project	CD34.Primary.Cells.SRX026920	44715964
Roadmap Epigenomics Project	CD34.Primary.Cells.SRX026921	35035060
Roadmap Epigenomics Project	CD34.Primary.Cells.SRX026922	33697328
Roadmap Epigenomics Project	CD34.Primary.Cells.SRX026923	37114712
Roadmap Epigenomics Project	CD34.Primary.Cells.SRX026926	39364100
Roadmap Epigenomics Project	CD34.Primary.Cells.SRX027077	31340761
Roadmap Epigenomics Project	CD34.Primary.Cells.SRX027080	24969889
Roadmap Epigenomics Project	CD34.Primary.Cells.SRX027081	24801999
Roadmap Epigenomics Project	CD34.Primary.Cells.SRX027082	19964472
Roadmap Epigenomics Project	CD34.Primary.Cells.SRX062365	216999018
Roadmap Epigenomics Project	CD34.Primary.Cells.SRX214040	389596176
Roadmap Epigenomics Project	CD3.Cord.Blood.Primary.Cells.SRX055189	20434449
Roadmap Epigenomics Project	CD3.Cord.Blood.Primary.Cells.SRX055190	20997174
Roadmap Epigenomics Project	CD3.Primary.Cells.SRX040413	20676057
Roadmap Epigenomics Project	CD3.Primary.Cells.SRX055180	35406634
Roadmap Epigenomics Project	CD3.Primary.Cells.SRX204362	342031016
Roadmap Epigenomics Project	CD4.Primary.Cells.SRX040388	32236305
Roadmap Epigenomics Project	CD4.Primary.Cells.SRX040415	24341556
Roadmap Epigenomics Project	CD4.Primary.Cells.SRX055203	27618250
Roadmap Epigenomics Project	CD4.Primary.Cells.SRX204404	92914936
Roadmap Epigenomics Project	CD4.Primary.Cells.SRX214041	437318174
Roadmap Epigenomics Project	CD56.Primary.Cells.SRX040412	19945881
Roadmap Epigenomics Project	CD56.Primary.Cells.SRX055172	28596692
Roadmap Epigenomics Project	CD56.Primary.Cells.SRX204402	77293514
Roadmap Epigenomics Project	CD8.Primary.Cells.SRX040389	36506910
Roadmap Epigenomics Project	CD8.Primary.Cells.SRX040414	27929286
Roadmap Epigenomics Project	CD8.Primary.Cells.SRX055163	24097572
Roadmap Epigenomics Project	CD8.Primary.Cells.SRX055204	27656287
Roadmap Epigenomics Project	CD8.Primary.Cells.SRX204403	82256094
Roadmap Epigenomics Project	CD8.Primary.Cells.SRX213515	533994940
Roadmap Epigenomics Project	Fetal.Adrenal.Gland.SRX026916	38488843
Roadmap Epigenomics Project	Fetal.Adrenal.Gland.SRX040375	32991877
Roadmap Epigenomics Project	Fetal.Adrenal.Gland.SRX100961	28935577
Roadmap Epigenomics Project	Fetal.Adrenal.Gland.SRX100963	27742411
Roadmap Epigenomics Project	Fetal.Adrenal.Gland.SRX121284	39305832
Roadmap Epigenomics Project	Fetal.Adrenal.Gland.SRX201797	27362885
Roadmap Epigenomics Project	Fetal.Adrenal.Gland.SRX201798	48000244
Roadmap Epigenomics Project	Fetal.Brain.SRX026914	27469337
Roadmap Epigenomics Project	Fetal.Brain.SRX027076	30889973
Roadmap Epigenomics Project	Fetal.Brain.SRX027083	24871047
Roadmap Epigenomics Project	Fetal.Brain.SRX027085	26237495
Roadmap Epigenomics Project	Fetal.Brain.SRX027086	23455624
Roadmap Epigenomics Project	Fetal.Brain.SRX027089	24245496
Roadmap Epigenomics Project	Fetal.Brain.SRX027091	20821918
Roadmap Epigenomics Project	Fetal.Brain.SRX040380	34447481
Roadmap Epigenomics Project	Fetal.Brain.SRX040395	34631466
Roadmap Epigenomics Project	Fetal.Brain.SRX062364	199232821
Roadmap Epigenomics Project	Fetal.Brain.SRX121276	34337779
Roadmap Epigenomics Project	Fetal.Brain.SRX121277	39313638
Roadmap Epigenomics Project	Fetal.Brain.SRX121278	27988101
Roadmap Epigenomics Project	Fetal.Brain.SRX201815	39730812
Roadmap Epigenomics Project	Fetal.Heart.SRX026917	26540547
Roadmap Epigenomics Project	Fetal.Heart.SRX026924	36122328
Roadmap Epigenomics Project	Fetal.Heart.SRX040385	20334728
Roadmap Epigenomics Project	Fetal.Heart.SRX040387	25086662
Roadmap Epigenomics Project	Fetal.Heart.SRX040390	24101368
Roadmap Epigenomics Project	Fetal.Heart.SRX040393	32529704
Roadmap Epigenomics Project	Fetal.Heart.SRX040400	34013722
Roadmap Epigenomics Project	Fetal.Heart.SRX040406	36592234
Roadmap Epigenomics Project	Fetal.Heart.SRX040407	37090671
Roadmap Epigenomics Project	Fetal.Heart.SRX062366	260931446
Roadmap Epigenomics Project	Fetal.Heart.SRX089242	56705502
Roadmap Epigenomics Project	Fetal.Heart.SRX101016	37263258
Roadmap Epigenomics Project	Fetal.Heart.SRX121256	42149114
Roadmap Epigenomics Project	Fetal.Intestine.Large.SRX040391	25621346
Roadmap Epigenomics Project	Fetal.Intestine.Large.SRX040394	26223498
Roadmap Epigenomics Project	Fetal.Intestine.Large.SRX040402	36529487
Roadmap Epigenomics Project	Fetal.Intestine.Large.SRX055154	21237236
Roadmap Epigenomics Project	Fetal.Intestine.Large.SRX055159	27654107
Roadmap Epigenomics Project	Fetal.Intestine.Large.SRX055178	29105590
Roadmap Epigenomics Project	Fetal.Intestine.Large.SRX055195	29464178
Roadmap Epigenomics Project	Fetal.Intestine.Large.SRX089252	22151629
Roadmap Epigenomics Project	Fetal.Intestine.Large.SRX089253	53269939
Roadmap Epigenomics Project	Fetal.Intestine.Large.SRX089256	67539456
Roadmap Epigenomics Project	Fetal.Intestine.Large.SRX089259	20953346
Roadmap Epigenomics Project	Fetal.Intestine.Large.SRX089267	80515377
Roadmap Epigenomics Project	Fetal.Intestine.Large.SRX089272	26667408
Roadmap Epigenomics Project	Fetal.Intestine.Large.SRX100958	34741278
Roadmap Epigenomics Project	Fetal.Intestine.Large.SRX100984	35251080
Roadmap Epigenomics Project	Fetal.Intestine.Large.SRX204363	427446309
Roadmap Epigenomics Project	Fetal.Intestine.Small.SRX040401	36226808
Roadmap Epigenomics Project	Fetal.Intestine.Small.SRX040411	40377983
Roadmap Epigenomics Project	Fetal.Intestine.Small.SRX055151	19736823
Roadmap Epigenomics Project	Fetal.Intestine.Small.SRX055160	23880158
Roadmap Epigenomics Project	Fetal.Intestine.Small.SRX055168	28315233
Roadmap Epigenomics Project	Fetal.Intestine.Small.SRX055194	22176549
Roadmap Epigenomics Project	Fetal.Intestine.Small.SRX089244	22237488
Roadmap Epigenomics Project	Fetal.Intestine.Small.SRX089249	23235343
Roadmap Epigenomics Project	Fetal.Intestine.Small.SRX089255	45275080
Roadmap Epigenomics Project	Fetal.Intestine.Small.SRX089264	62631557
Roadmap Epigenomics Project	Fetal.Intestine.Small.SRX089268	34650690
Roadmap Epigenomics Project	Fetal.Intestine.Small.SRX100957	28847489
Roadmap Epigenomics Project	Fetal.Intestine.Small.SRX100983	40510070
Roadmap Epigenomics Project	Fetal.Intestine.Small.SRX201835	381131510
Roadmap Epigenomics Project	Fetal.Kidney.Left.SRX040398	29520319
Roadmap Epigenomics Project	Fetal.Kidney.Left.SRX040405	34818900
Roadmap Epigenomics Project	Fetal.Kidney.Left.SRX040410	26299785
Roadmap Epigenomics Project	Fetal.Kidney.Left.SRX089248	24304964
Roadmap Epigenomics Project	Fetal.Kidney.Left.SRX100977	34997330
Roadmap Epigenomics Project	Fetal.Kidney.Left.SRX201823	55331761
Roadmap Epigenomics Project	Fetal.Kidney.Left.SRX201825	46570011
Roadmap Epigenomics Project	Fetal.Kidney.Left.SRX201834	45128104
Roadmap Epigenomics Project	Fetal.Kidney.Right.SRX040386	34905022
Roadmap Epigenomics Project	Fetal.Kidney.Right.SRX040409	38006294
Roadmap Epigenomics Project	Fetal.Kidney.Right.SRX100959	24502420
Roadmap Epigenomics Project	Fetal.Kidney.Right.SRX100976	37622600
Roadmap Epigenomics Project	Fetal.Kidney.Right.SRX201195	42071986
Roadmap Epigenomics Project	Fetal.Kidney.Right.SRX201824	27875139
Roadmap Epigenomics Project	Fetal.Kidney.Right.SRX201827	25361587
Roadmap Epigenomics Project	Fetal.Kidney.Right.SRX201833	33950953
Roadmap Epigenomics Project	Fetal.Kidney.SRX015225	37739966
Roadmap Epigenomics Project	Fetal.Kidney.SRX026918	27654474
Roadmap Epigenomics Project	Fetal.Kidney.SRX040392	28175283
Roadmap Epigenomics Project	Fetal.Kidney.SRX055179	36182283
Roadmap Epigenomics Project	Fetal.Kidney.SRX089260	29800593
Roadmap Epigenomics Project	Fetal.Kidney.SRX100955	30284476
Roadmap Epigenomics Project	Fetal.Kidney.SRX121292	26230129
Roadmap Epigenomics Project	Fetal.Kidney.SRX201196	21408996
Roadmap Epigenomics Project	Fetal.Kidney.SRX201816	28092541
Roadmap Epigenomics Project	Fetal.Kidney.SRX201829	43151226
Roadmap Epigenomics Project	Fetal.Lung.Left.SRX040384	35479346
Roadmap Epigenomics Project	Fetal.Lung.Left.SRX040404	38005821
Roadmap Epigenomics Project	Fetal.Lung.Left.SRX055176	38653438
Roadmap Epigenomics Project	Fetal.Lung.Left.SRX055188	21328210
Roadmap Epigenomics Project	Fetal.Lung.Left.SRX055191	19839047
Roadmap Epigenomics Project	Fetal.Lung.Left.SRX055198	11683460
Roadmap Epigenomics Project	Fetal.Lung.Left.SRX089246	33290494
Roadmap Epigenomics Project	Fetal.Lung.Left.SRX089250	52031811
Roadmap Epigenomics Project	Fetal.Lung.Left.SRX089276	88525626
Roadmap Epigenomics Project	Fetal.Lung.Left.SRX100964	34235618
Roadmap Epigenomics Project	Fetal.Lung.Left.SRX100971	38910266
Roadmap Epigenomics Project	Fetal.Lung.Left.SRX100981	46771892
Roadmap Epigenomics Project	Fetal.Lung.Left.SRX201832	49815232
Roadmap Epigenomics Project	Fetal.Lung.Right.SRX040383	27946792
Roadmap Epigenomics Project	Fetal.Lung.Right.SRX040403	30383605
Roadmap Epigenomics Project	Fetal.Lung.Right.SRX040408	38238274
Roadmap Epigenomics Project	Fetal.Lung.Right.SRX055187	40523132
Roadmap Epigenomics Project	Fetal.Lung.Right.SRX089245	37830084
Roadmap Epigenomics Project	Fetal.Lung.Right.SRX089266	70708905
Roadmap Epigenomics Project	Fetal.Lung.Right.SRX089270	52923299
Roadmap Epigenomics Project	Fetal.Lung.Right.SRX100960	31068720
Roadmap Epigenomics Project	Fetal.Lung.Right.SRX100970	42102692
Roadmap Epigenomics Project	Fetal.Lung.Right.SRX100982	38947323
Roadmap Epigenomics Project	Fetal.Lung.Right.SRX201831	46057425
Roadmap Epigenomics Project	Fetal.Lung.SRX026919	27871853
Roadmap Epigenomics Project	Fetal.Lung.SRX026925	29451620
Roadmap Epigenomics Project	Fetal.Lung.SRX027078	43438722
Roadmap Epigenomics Project	Fetal.Lung.SRX027079	41457173
Roadmap Epigenomics Project	Fetal.Lung.SRX027084	20530443
Roadmap Epigenomics Project	Fetal.Lung.SRX027087	24327073
Roadmap Epigenomics Project	Fetal.Lung.SRX027088	22140270
Roadmap Epigenomics Project	Fetal.Lung.SRX027090	17719939
Roadmap Epigenomics Project	Fetal.Lung.SRX027092	19521133
Roadmap Epigenomics Project	Fetal.Lung.SRX027093	21685112
Roadmap Epigenomics Project	Fetal.Lung.SRX040381	35690676
Roadmap Epigenomics Project	Fetal.Lung.SRX040382	37277280
Roadmap Epigenomics Project	Fetal.Lung.SRX062368	266582966
Roadmap Epigenomics Project	Fetal.Muscle.Arm.SRX055170	29238810
Roadmap Epigenomics Project	Fetal.Muscle.Arm.SRX055199	29889318
Roadmap Epigenomics Project	Fetal.Muscle.Arm.SRX089262	89873640
Roadmap Epigenomics Project	Fetal.Muscle.Arm.SRX089265	38836763
Roadmap Epigenomics Project	Fetal.Muscle.Arm.SRX089273	82836931
Roadmap Epigenomics Project	Fetal.Muscle.Arm.SRX089278	41475726
Roadmap Epigenomics Project	Fetal.Muscle.Arm.SRX100974	38264980
Roadmap Epigenomics Project	Fetal.Muscle.Arm.SRX100980	35402299
Roadmap Epigenomics Project	Fetal.Muscle.Arm.SRX100987	25019262
Roadmap Epigenomics Project	Fetal.Muscle.Arm.SRX101010	27520908
Roadmap Epigenomics Project	Fetal.Muscle.Arm.SRX101012	35138668
Roadmap Epigenomics Project	Fetal.Muscle.Arm.SRX121236	19287658
Roadmap Epigenomics Project	Fetal.Muscle.Arm.SRX121244	23149982
Roadmap Epigenomics Project	Fetal.Muscle.Arm.SRX121245	25868413
Roadmap Epigenomics Project	Fetal.Muscle.Arm.SRX121246	33323015
Roadmap Epigenomics Project	Fetal.Muscle.Arm.SRX121251	33231143
Roadmap Epigenomics Project	Fetal.Muscle.Arm.SRX121264	29074395
Roadmap Epigenomics Project	Fetal.Muscle.Arm.SRX201193	20398879
Roadmap Epigenomics Project	Fetal.Muscle.Arm.SRX201836	203156597
Roadmap Epigenomics Project	Fetal.Muscle.Back.SRX055200	28738670
Roadmap Epigenomics Project	Fetal.Muscle.Back.SRX089263	73578650
Roadmap Epigenomics Project	Fetal.Muscle.Back.SRX089274	88535634
Roadmap Epigenomics Project	Fetal.Muscle.Back.SRX100967	29240050
Roadmap Epigenomics Project	Fetal.Muscle.Back.SRX100978	32003564
Roadmap Epigenomics Project	Fetal.Muscle.Back.SRX100996	28822843
Roadmap Epigenomics Project	Fetal.Muscle.Back.SRX101003	27419846
Roadmap Epigenomics Project	Fetal.Muscle.Back.SRX101008	25732608
Roadmap Epigenomics Project	Fetal.Muscle.Back.SRX101013	35252470
Roadmap Epigenomics Project	Fetal.Muscle.Back.SRX121237	31436657
Roadmap Epigenomics Project	Fetal.Muscle.Back.SRX121258	28242872
Roadmap Epigenomics Project	Fetal.Muscle.Back.SRX121265	77927512
Roadmap Epigenomics Project	Fetal.Muscle.Back.SRX121281	34943987
Roadmap Epigenomics Project	Fetal.Muscle.Back.SRX201817	33335324
Roadmap Epigenomics Project	Fetal.Muscle.Back.SRX201828	30916342
Roadmap Epigenomics Project	Fetal.Muscle.Back.SRX214042	383629385
Roadmap Epigenomics Project	Fetal.Muscle.Leg.SRX055169	26721305
Roadmap Epigenomics Project	Fetal.Muscle.Leg.SRX089281	25851310
Roadmap Epigenomics Project	Fetal.Muscle.Leg.SRX100975	37302412
Roadmap Epigenomics Project	Fetal.Muscle.Leg.SRX100979	33911161
Roadmap Epigenomics Project	Fetal.Muscle.Leg.SRX100997	20885148
Roadmap Epigenomics Project	Fetal.Muscle.Leg.SRX101002	31220637
Roadmap Epigenomics Project	Fetal.Muscle.Leg.SRX101009	28668070
Roadmap Epigenomics Project	Fetal.Muscle.Leg.SRX121248	46833724
Roadmap Epigenomics Project	Fetal.Muscle.Leg.SRX121252	45491859
Roadmap Epigenomics Project	Fetal.Muscle.Leg.SRX121257	37399904
Roadmap Epigenomics Project	Fetal.Muscle.Leg.SRX121263	31171210
Roadmap Epigenomics Project	Fetal.Muscle.Leg.SRX121279	41958967
Roadmap Epigenomics Project	Fetal.Muscle.Leg.SRX201796	33818972
Roadmap Epigenomics Project	Fetal.Muscle.Leg.SRX201820	34257076
Roadmap Epigenomics Project	Fetal.Muscle.Leg.SRX214044	60687404
Roadmap Epigenomics Project	Fetal.Muscle.Lower.Limb.Skeletal.SRX089277	77982784
Roadmap Epigenomics Project	Fetal.Muscle.Trunk.SRX055197	30301350
Roadmap Epigenomics Project	Fetal.Muscle.Trunk.SRX121280	45717565
Roadmap Epigenomics Project	Fetal.Muscle.Trunk.SRX121290	43664735
Roadmap Epigenomics Project	Fetal.Muscle.Trunk.SRX214045	63895914
Roadmap Epigenomics Project	Fetal.Muscle.Upper.Limb.Skeletal.SRX055186	20858977
Roadmap Epigenomics Project	Fetal.Muscle.Upper.Trunk.SRX089257	43886974
Roadmap Epigenomics Project	Fetal.Ovary.SRX201793	30629879
Roadmap Epigenomics Project	Fetal.Placenta.SRX089254	73126484
Roadmap Epigenomics Project	Fetal.Placenta.SRX089258	28061145
Roadmap Epigenomics Project	Fetal.Placenta.SRX101015	33403634
Roadmap Epigenomics Project	Fetal.Placenta.SRX121285	30832983
Roadmap Epigenomics Project	Fetal.Placenta.SRX201819	44860335
Roadmap Epigenomics Project	Fetal.Placenta.SRX201830	38563918
Roadmap Epigenomics Project	Fetal.Placenta.SRX214046	329739792
Roadmap Epigenomics Project	Fetal.Renal.Cortex.Left.SRX055183	31917400
Roadmap Epigenomics Project	Fetal.Renal.Cortex.Left.SRX100986	38113497
Roadmap Epigenomics Project	Fetal.Renal.Cortex.Left.SRX100999	22704781
Roadmap Epigenomics Project	Fetal.Renal.Cortex.Left.SRX101007	33388447
Roadmap Epigenomics Project	Fetal.Renal.Cortex.Right.SRX055181	37347291
Roadmap Epigenomics Project	Fetal.Renal.Cortex.Right.SRX100998	27879289
Roadmap Epigenomics Project	Fetal.Renal.Cortex.Right.SRX101006	28252503
Roadmap Epigenomics Project	Fetal.Renal.Cortex.SRX055158	31296149
Roadmap Epigenomics Project	Fetal.Renal.Cortex.SRX055166	24874356
Roadmap Epigenomics Project	Fetal.Renal.Cortex.SRX055175	29299431
Roadmap Epigenomics Project	Fetal.Renal.Cortex.SRX055193	20092187
Roadmap Epigenomics Project	Fetal.Renal.Cortex.SRX055196	29602844
Roadmap Epigenomics Project	Fetal.Renal.Cortex.SRX100972	38791227
Roadmap Epigenomics Project	Fetal.Renal.Cortex.SRX121255	21256186
Roadmap Epigenomics Project	Fetal.Renal.Cortex.SRX121293	36334073
Roadmap Epigenomics Project	Fetal.Renal.Cortex.SRX201801	32880935
Roadmap Epigenomics Project	Fetal.Renal.Cortex.SRX201803	30336143
Roadmap Epigenomics Project	Fetal.Renal.Cortex.SRX201810	55284484
Roadmap Epigenomics Project	Fetal.Renal.Pelvis.Left.SRX055184	27685249
Roadmap Epigenomics Project	Fetal.Renal.Pelvis.Left.SRX100989	24131696
Roadmap Epigenomics Project	Fetal.Renal.Pelvis.Left.SRX101001	30585627
Roadmap Epigenomics Project	Fetal.Renal.Pelvis.Left.SRX101005	29839748
Roadmap Epigenomics Project	Fetal.Renal.Pelvis.Right.SRX055182	34268953
Roadmap Epigenomics Project	Fetal.Renal.Pelvis.Right.SRX100988	31848471
Roadmap Epigenomics Project	Fetal.Renal.Pelvis.Right.SRX101000	26315065
Roadmap Epigenomics Project	Fetal.Renal.Pelvis.Right.SRX101004	30572557
Roadmap Epigenomics Project	Fetal.Renal.Pelvis.SRX055165	29419521
Roadmap Epigenomics Project	Fetal.Renal.Pelvis.SRX055174	34898695
Roadmap Epigenomics Project	Fetal.Renal.Pelvis.SRX089261	37956058
Roadmap Epigenomics Project	Fetal.Renal.Pelvis.SRX089275	21554915
Roadmap Epigenomics Project	Fetal.Renal.Pelvis.SRX100973	30751073
Roadmap Epigenomics Project	Fetal.Renal.Pelvis.SRX101014	28095335
Roadmap Epigenomics Project	Fetal.Renal.Pelvis.SRX121288	56168276
Roadmap Epigenomics Project	Fetal.Renal.Pelvis.SRX201802	38985183
Roadmap Epigenomics Project	Fetal.Renal.Pelvis.SRX201804	22993239
Roadmap Epigenomics Project	Fetal.Renal.Pelvis.SRX201811	43005166
Roadmap Epigenomics Project	Fetal.Skin.SRX100954	33598375
Roadmap Epigenomics Project	Fetal.Spinal.Cord.SRX100985	40871581
Roadmap Epigenomics Project	Fetal.Spinal.Cord.SRX121287	43561243
Roadmap Epigenomics Project	Fetal.Spinal.Cord.SRX121289	38809113
Roadmap Epigenomics Project	Fetal.Spinal.Cord.SRX201795	34981337
Roadmap Epigenomics Project	Fetal.Spinal.Cord.SRX201826	24938166
Roadmap Epigenomics Project	Fetal.Spinal.Cord.SRX214047	380915801
Roadmap Epigenomics Project	Fetal.Spleen.SRX055173	28244817
Roadmap Epigenomics Project	Fetal.Stomach.SRX055162	20593312
Roadmap Epigenomics Project	Fetal.Stomach.SRX055185	20207779
Roadmap Epigenomics Project	Fetal.Stomach.SRX055192	21200352
Roadmap Epigenomics Project	Fetal.Stomach.SRX055202	30326436
Roadmap Epigenomics Project	Fetal.Stomach.SRX089241	29367032
Roadmap Epigenomics Project	Fetal.Stomach.SRX089251	25263080
Roadmap Epigenomics Project	Fetal.Stomach.SRX089271	28149465
Roadmap Epigenomics Project	Fetal.Stomach.SRX100969	30774708
Roadmap Epigenomics Project	Fetal.Stomach.SRX100995	34894722
Roadmap Epigenomics Project	Fetal.Stomach.SRX121286	33357305
Roadmap Epigenomics Project	Fetal.Stomach.SRX121291	32169068
Roadmap Epigenomics Project	Fetal.Stomach.SRX201194	61899560
Roadmap Epigenomics Project	Fetal.Stomach.SRX201805	63357546
Roadmap Epigenomics Project	Fetal.Stomach.SRX201818	35058762
Roadmap Epigenomics Project	Fetal.Stomach.SRX214043	282458140
Roadmap Epigenomics Project	Fetal.Testes.SRX121243	26220741
Roadmap Epigenomics Project	Fetal.Testes.SRX201806	43008876
Roadmap Epigenomics Project	Fetal.Thymus.SRX040399	34422496
Roadmap Epigenomics Project	Fetal.Thymus.SRX055161	27464511
Roadmap Epigenomics Project	Fetal.Thymus.SRX055177	38535539
Roadmap Epigenomics Project	Fetal.Thymus.SRX055201	28704398
Roadmap Epigenomics Project	Fetal.Thymus.SRX089243	28511305
Roadmap Epigenomics Project	Fetal.Thymus.SRX089269	76318988
Roadmap Epigenomics Project	Fetal.Thymus.SRX100968	83086558
Roadmap Epigenomics Project	Fetal.Thymus.SRX121253	22408504
Roadmap Epigenomics Project	Fetal.Thymus.SRX121282	32472853
Roadmap Epigenomics Project	Fetal.Thymus.SRX121283	31171735
Roadmap Epigenomics Project	Fetal.Thymus.SRX201800	46310080
Roadmap Epigenomics Project	Fetal.Thymus.SRX201838	317785227
Roadmap Epigenomics Project	Fibroblasts.Fetal.Skin.Abdomen.SRX121261	40001369
Roadmap Epigenomics Project	Fibroblasts.Fetal.Skin.Abdomen.SRX121262	44586665
Roadmap Epigenomics Project	Fibroblasts.Fetal.Skin.Back.SRX121249	33975064
Roadmap Epigenomics Project	Fibroblasts.Fetal.Skin.Back.SRX121250	36509029
Roadmap Epigenomics Project	Fibroblasts.Fetal.Skin.Biceps.Left.SRX121270	38797241
Roadmap Epigenomics Project	Fibroblasts.Fetal.Skin.Biceps.Left.SRX121271	34307396
Roadmap Epigenomics Project	Fibroblasts.Fetal.Skin.Biceps.Right.SRX121268	26467407
Roadmap Epigenomics Project	Fibroblasts.Fetal.Skin.Biceps.Right.SRX121269	41529243
Roadmap Epigenomics Project	Fibroblasts.Fetal.Skin.Quadriceps.Left.SRX121274	47778351
Roadmap Epigenomics Project	Fibroblasts.Fetal.Skin.Quadriceps.Left.SRX121275	49880422
Roadmap Epigenomics Project	Fibroblasts.Fetal.Skin.Quadriceps.Right.SRX121272	34722166
Roadmap Epigenomics Project	Fibroblasts.Fetal.Skin.Quadriceps.Right.SRX121273	53230227
Roadmap Epigenomics Project	Fibroblasts.Fetal.Skin.Scalp.SRX121259	30157114
Roadmap Epigenomics Project	Fibroblasts.Fetal.Skin.Scalp.SRX121260	31784518
Roadmap Epigenomics Project	Fibroblasts.Fetal.Skin.Upper.Back.SRX121266	31686890
Roadmap Epigenomics Project	Fibroblasts.Fetal.Skin.Upper.Back.SRX121267	44226866
Roadmap Epigenomics Project	H1.BMP4.Derived.Mesendoderm.Cultured.Cells.SRX100994	24729695
Roadmap Epigenomics Project	H1.BMP4.Derived.Mesendoderm.Cultured.Cells.SRX101011	30107611
Roadmap Epigenomics Project	H1.BMP4.Derived.Mesendoderm.Cultured.Cells.SRX135565	315515585
Roadmap Epigenomics Project	H1.BMP4.Derived.Trophoblast.Cultured.Cells.SRX121240	40101055
Roadmap Epigenomics Project	H1.BMP4.Derived.Trophoblast.Cultured.Cells.SRX121254	32870092
Roadmap Epigenomics Project	H1.BMP4.Derived.Trophoblast.Cultured.Cells.SRX134724	178000451
Roadmap Epigenomics Project	H1.Cell.Line.SRX121242	44819999
Roadmap Epigenomics Project	H1.Cell.Line.SRX121247	26724311
Roadmap Epigenomics Project	H1.Derived.Mesenchymal.Stem.Cells.SRX134722	37117953
Roadmap Epigenomics Project	H1.Derived.Mesenchymal.Stem.Cells.SRX134723	53479651
Roadmap Epigenomics Project	H1.Derived.Mesenchymal.Stem.Cells.SRX135566	239552216
Roadmap Epigenomics Project	H1.Derived.Neuronal.Progenitor.Cultured.Cells.SRX121241	34633830
Roadmap Epigenomics Project	H1.Derived.Neuronal.Progenitor.Cultured.Cells.SRX134721	43670945
Roadmap Epigenomics Project	H9.Cell.Line.SRX121238	41259595
Roadmap Epigenomics Project	H9.Cell.Line.SRX121239	29490712
Roadmap Epigenomics Project	Heart.SRX201809	38143952
Roadmap Epigenomics Project	IMR90.Cell.Line.SRX012425	30255730
Roadmap Epigenomics Project	IMR90.Cell.Line.SRX012426	27017443
Roadmap Epigenomics Project	IMR90.Cell.Line.SRX018822	61307803
Roadmap Epigenomics Project	IMR90.Cell.Line.SRX018823	46275042
Roadmap Epigenomics Project	IMR90.Cell.Line.SRX062367	240457662
Roadmap Epigenomics Project	iPS.DF.1911.Cell.Line.SRX040377	24748831
Roadmap Epigenomics Project	iPS.DF.1911.Cell.Line.SRX135563	216078774
Roadmap Epigenomics Project	iPS.DF.197.Cell.Line.SRX040376	22986387
Roadmap Epigenomics Project	iPS.DF.47.Cell.Line.SRX040379	23033267
Roadmap Epigenomics Project	iPS.DF.69.Cell.Line.SRX040378	24969102
Roadmap Epigenomics Project	Mobilized.CD34.Primary.Cells.SRX026927	35013744
Roadmap Epigenomics Project	Mobilized.CD34.Primary.Cells.SRX040374	25340441
Roadmap Epigenomics Project	Mobilized.CD34.Primary.Cells.SRX089247	19454158
Roadmap Epigenomics Project	Mobilized.CD3.Primary.Cells.SRX055152	47732720
Roadmap Epigenomics Project	Mobilized.CD3.Primary.Cells.SRX089240	33533717
Roadmap Epigenomics Project	Mobilized.CD4.Primary.Cells.SRX055153	37197862
Roadmap Epigenomics Project	Mobilized.CD4.Primary.Cells.SRX055155	25356644
Roadmap Epigenomics Project	Mobilized.CD4.Primary.Cells.SRX100962	30553993
Roadmap Epigenomics Project	Mobilized.CD56.Primary.Cells.SRX040396	34681923
Roadmap Epigenomics Project	Mobilized.CD8.Primary.Cells.SRX100956	24023014
Roadmap Epigenomics Project	Penis.Foreskin.Fibroblast.Primary.Cells.SRX089279	90259092
Roadmap Epigenomics Project	Penis.Foreskin.Fibroblast.Primary.Cells.SRX089280	53205499
Roadmap Epigenomics Project	Penis.Foreskin.Fibroblast.Primary.Cells.SRX100965	31831203
Roadmap Epigenomics Project	Penis.Foreskin.Fibroblast.Primary.Cells.SRX100966	39138511
Roadmap Epigenomics Project	Penis.Foreskin.Fibroblast.Primary.Cells.SRX135564	423213045
Roadmap Epigenomics Project	Penis.Foreskin.Keratinocyte.Primary.Cells.SRX100990	31481202
Roadmap Epigenomics Project	Penis.Foreskin.Keratinocyte.Primary.Cells.SRX100991	34014116
Roadmap Epigenomics Project	Penis.Foreskin.Keratinocyte.Primary.Cells.SRX100992	29162959
Roadmap Epigenomics Project	Penis.Foreskin.Keratinocyte.Primary.Cells.SRX100993	38004547
Roadmap Epigenomics Project	Penis.Foreskin.Keratinocyte.Primary.Cells.SRX201837	278896847
Roadmap Epigenomics Project	Penis.Foreskin.Melanocyte.Primary.Cells.SRX089282	43696408
Roadmap Epigenomics Project	Penis.Foreskin.Melanocyte.Primary.Cells.SRX089283	44473538
Roadmap Epigenomics Project	Penis.Foreskin.Melanocyte.Primary.Cells.SRX201198	226381749
Roadmap Epigenomics Project	Penis.Foreskin.Melanocyte.Primary.Cells.SRX201794	39385141
Roadmap Epigenomics Project	Penis.Foreskin.Melanocyte.Primary.Cells.SRX201799	42359450
ENCODE Project	OpenChromDnase8988t	88219509
ENCODE Project	OpenChromDnaseA549	120749371
ENCODE Project	OpenChromDnaseAdultcd4th0	110972430
ENCODE Project	OpenChromDnaseAdultcd4th1	108988147
ENCODE Project	OpenChromDnaseAosmcSerumfree	69724882
ENCODE Project	OpenChromDnaseCd20ro01794	236543972
ENCODE Project	OpenChromDnaseCerebellumoc	292417086
ENCODE Project	OpenChromDnaseCerebrumfrontaloc	284072053
ENCODE Project	OpenChromDnaseChorion	98690904
ENCODE Project	OpenChromDnaseCll	154557728
ENCODE Project	OpenChromDnaseColo829	119016103
ENCODE Project	OpenChromDnaseEcc1Dm002p1h	202676231
ENCODE Project	OpenChromDnaseEcc1Est10nm30m	232471112
ENCODE Project	OpenChromDnaseFibroblgm03348Lenticon	286988226
ENCODE Project	OpenChromDnaseFibroblgm03348Lentimyod	304961015
ENCODE Project	OpenChromDnaseFibroblgm03348	283323150
ENCODE Project	OpenChromDnaseFibrobl	56219278
ENCODE Project	OpenChromDnaseFibropag08395	262834804
ENCODE Project	OpenChromDnaseFibropag08396	211857127
ENCODE Project	OpenChromDnaseFibropag20443	320180401
ENCODE Project	OpenChromDnaseFibrop	103536047
ENCODE Project	OpenChromDnaseFrontalcortexoc	254977290
ENCODE Project	OpenChromDnaseGcbcell	190357971
ENCODE Project	OpenChromDnaseGliobla	89270333
ENCODE Project	OpenChromDnaseGm10248	294466703
ENCODE Project	OpenChromDnaseGm10266	289738660
ENCODE Project	OpenChromDnaseGm12878	220005763
ENCODE Project	OpenChromDnaseGm12891	59789625
ENCODE Project	OpenChromDnaseGm12892	62205503
ENCODE Project	OpenChromDnaseGm13976	290653411
ENCODE Project	OpenChromDnaseGm13977	305857088
ENCODE Project	OpenChromDnaseGm18507	39998287
ENCODE Project	OpenChromDnaseGm19238	62355272
ENCODE Project	OpenChromDnaseGm19239	60205455
ENCODE Project	OpenChromDnaseGm19240	59653115
ENCODE Project	OpenChromDnaseGm20000	285669429
ENCODE Project	OpenChromDnaseH1hesc	100315231
ENCODE Project	OpenChromDnaseH7es	393894584
ENCODE Project	OpenChromDnaseH9es	58662510
ENCODE Project	OpenChromDnaseHeartoc	282295549
ENCODE Project	OpenChromDnaseHek293t	205112316
ENCODE Project	OpenChromDnaseHelas3Ifna4h	98639395
ENCODE Project	OpenChromDnaseHelas3	48860797
ENCODE Project	OpenChromDnaseHepatocytes	107282883
ENCODE Project	OpenChromDnaseHepg2	45717077
ENCODE Project	OpenChromDnaseHmec	93428219
ENCODE Project	OpenChromDnaseHpde6e6e7	100831641
ENCODE Project	OpenChromDnaseHsmmemb	94867848
ENCODE Project	OpenChromDnaseHsmmfshd	131614616
ENCODE Project	OpenChromDnaseHsmmt	110270261
ENCODE Project	OpenChromDnaseHsmm	84037480
ENCODE Project	OpenChromDnaseHtr8	92427971
ENCODE Project	OpenChromDnaseHuh75	99968995
ENCODE Project	OpenChromDnaseHuh7	96508177
ENCODE Project	OpenChromDnaseHuvec	28603101
ENCODE Project	OpenChromDnaseImr90	264425610
ENCODE Project	OpenChromDnaseIpscwru1	158726876
ENCODE Project	OpenChromDnaseIpsnihi11	278607348
ENCODE Project	OpenChromDnaseIpsnihi7	302579413
ENCODE Project	OpenChromDnaseIps	140546510
ENCODE Project	OpenChromDnaseIshikawaEst10nm30m	127718065
ENCODE Project	OpenChromDnaseIshikawaTam10030	122729040
ENCODE Project	OpenChromDnaseK562G1phase	383792656
ENCODE Project	OpenChromDnaseK562G2mphase	388337643
ENCODE Project	OpenChromDnaseK562Nabut	242144466
ENCODE Project	OpenChromDnaseK562Saha1u72hr	434763409
ENCODE Project	OpenChromDnaseK562Sahactrl	436523704
ENCODE Project	OpenChromDnaseK562	366515682
ENCODE Project	OpenChromDnaseLncapAndro	133001303
ENCODE Project	OpenChromDnaseLncap	148487850
ENCODE Project	OpenChromDnaseMcf7Ctcfshrna	266836948
ENCODE Project	OpenChromDnaseMcf7Hypoxlaccon	106967960
ENCODE Project	OpenChromDnaseMcf7Hypoxlac	116462926
ENCODE Project	OpenChromDnaseMcf7Randshrna	262091795
ENCODE Project	OpenChromDnaseMcf7	80028115
ENCODE Project	OpenChromDnaseMedullod341	272368402
ENCODE Project	OpenChromDnaseMedullo	78204923
ENCODE Project	OpenChromDnaseMel2183	112772533
ENCODE Project	OpenChromDnaseMelano	134847614
ENCODE Project	OpenChromDnaseMonocd14	249406798
ENCODE Project	OpenChromDnaseMyometr	79957721
ENCODE Project	OpenChromDnaseNaivebcell	273958442
ENCODE Project	OpenChromDnaseNhek	36154103
ENCODE Project	OpenChromDnaseOlfneurosphere	331453808
ENCODE Project	OpenChromDnaseOsteobl	189033993
ENCODE Project	OpenChromDnasePanisd	111418054
ENCODE Project	OpenChromDnasePanislets	71500979
ENCODE Project	OpenChromDnasePhte	87049195
ENCODE Project	OpenChromDnaseProgfib	72189882
ENCODE Project	OpenChromDnasePsoasmuscleoc	297783294
ENCODE Project	OpenChromDnaseRwpe1	116764820
ENCODE Project	OpenChromDnaseSknsh	254910855
ENCODE Project	OpenChromDnaseStellate	124532719
ENCODE Project	OpenChromDnaseT47dEst10nm30m	253399870
ENCODE Project	OpenChromDnaseT47d	114173571
ENCODE Project	OpenChromDnaseUrothelUt189	193807071
ENCODE Project	OpenChromDnaseUrothel	189040148
ENCODE Project	OpenChromDnaseUrotsaUt189	110821043
ENCODE Project	OpenChromDnaseUrotsa	104767196
ENCODE Project	UwDgfA549	350629025
ENCODE Project	UwDgfAg10803	284236134
ENCODE Project	UwDgfAoaf	331043126
ENCODE Project	UwDgfCd20ro01778	240594381
ENCODE Project	UwDgfCd4naivewb11970640	308906598
ENCODE Project	UwDgfGm06990	137532516
ENCODE Project	UwDgfGm12865	263505500
ENCODE Project	UwDgfH7es	302050613
ENCODE Project	UwDgfHae	281238024
ENCODE Project	UwDgfHah	367030501
ENCODE Project	UwDgfHasp	292748281
ENCODE Project	UwDgfHcfaa	365088727
ENCODE Project	UwDgfHcf	289961231
ENCODE Project	UwDgfHcm	274790098
ENCODE Project	UwDgfHcpe	253925468
ENCODE Project	UwDgfHee	342975632
ENCODE Project	UwDgfHepg2	168883340
ENCODE Project	UwDgfHff	262521639
ENCODE Project	UwDgfHgf	336716968
ENCODE Project	UwDgfHipe	254744855
ENCODE Project	UwDgfHmf	311000423
ENCODE Project	UwDgfHmvecb	313021938
ENCODE Project	UwDgfHmvecdblad	239063241
ENCODE Project	UwDgfHmvecd	293473616
ENCODE Project	UwDgfHmvecf	270345129
ENCODE Project	UwDgfHmvech	359408163
ENCODE Project	UwDgfHpaf	255470476
ENCODE Project	UwDgfHpdlf	304268867
ENCODE Project	UwDgfHpf	296713695
ENCODE Project	UwDgfHrce	236736386
ENCODE Project	UwDgfHsmm	367269084
ENCODE Project	UwDgfHuvec	429088264
ENCODE Project	UwDgfHvmf	279802853
ENCODE Project	UwDgfK562	179970573
ENCODE Project	UwDgfK562Znfa41c6	372806322
ENCODE Project	UwDgfK562Znfp5	346226669
ENCODE Project	UwDgfLhcnm2Diff4d	357827348
ENCODE Project	UwDgfLhcnm2	255134448
ENCODE Project	UwDgfM059j	386886262
ENCODE Project	UwDgfMonocd14ro1746	270931334
ENCODE Project	UwDgfNb4	323812085
ENCODE Project	UwDgfNha	231589041
ENCODE Project	UwDgfNhdfad	235650094
ENCODE Project	UwDgfNhdfneo	373361748
ENCODE Project	UwDgfNhlf	357163539
ENCODE Project	UwDgfRpmi7951	350890987
ENCODE Project	UwDgfSaec	243838474
ENCODE Project	UwDgfSkmc	543886927
ENCODE Project	UwDgfSknshra	164615400
ENCODE Project	UwDgfT47d	350931994
ENCODE Project	UwDgfTh17	207056773
ENCODE Project	UwDgfTh1wb33676984	265412002
ENCODE Project	UwDgfTh1	527280750
ENCODE Project	UwDgfTh2wb54553204	408764584
ENCODE Project	UwDgfTh2	383640798
ENCODE Project	UwDgfTregwb78495824	241377514
ENCODE Project	UwDnaseA549	75764708
ENCODE Project	UwDnaseAg04449	60809745
ENCODE Project	UwDnaseAg04450	63502026
ENCODE Project	UwDnaseAg09309	76414573
ENCODE Project	UwDnaseAg09319	57484750
ENCODE Project	UwDnaseAg10803	70872278
ENCODE Project	UwDnaseAoaf	60316294
ENCODE Project	UwDnaseBe2c	97523614
ENCODE Project	UwDnaseBj	75813994
ENCODE Project	UwDnaseCaco2	49887409
ENCODE Project	UwDnaseCd20ro01778	71398618
ENCODE Project	UwDnaseCd34mobilized	49756219
ENCODE Project	UwDnaseCd4naivewb11970640	24083134
ENCODE Project	UwDnaseCd4naivewb78495824	20093285
ENCODE Project	UwDnaseCmk	31319073
ENCODE Project	UwDnaseGm04504	73631666
ENCODE Project	UwDnaseGm06990	43653254
ENCODE Project	UwDnaseGm12864	29163777
ENCODE Project	UwDnaseGm12865	71492360
ENCODE Project	UwDnaseGm12878	47899405
ENCODE Project	UwDnaseH1hesc	24431579
ENCODE Project	UwDnaseH7esDiffa14d	69936517
ENCODE Project	UwDnaseH7esDiffa2d	24392212
ENCODE Project	UwDnaseH7esDiffa5d	77019050
ENCODE Project	UwDnaseH7esDiffa9d	75675507
ENCODE Project	UwDnaseH7es	58523902
ENCODE Project	UwDnaseHac	79330129
ENCODE Project	UwDnaseHae	64665192
ENCODE Project	UwDnaseHah	63777322
ENCODE Project	UwDnaseHasp	77264609
ENCODE Project	UwDnaseHbmec	80539938
ENCODE Project	UwDnaseHbvp	47747677
ENCODE Project	UwDnaseHbvsmc	53356948
ENCODE Project	UwDnaseHcfaa	66181779
ENCODE Project	UwDnaseHcf	71200859
ENCODE Project	UwDnaseHcm	70188549
ENCODE Project	UwDnaseHconf	80958802
ENCODE Project	UwDnaseHcpe	61405498
ENCODE Project	UwDnaseHct116	80919596
ENCODE Project	UwDnaseHee	72883797
ENCODE Project	UwDnaseHelas3	70669966
ENCODE Project	UwDnaseHepg2	44677417
ENCODE Project	UwDnaseHffmyc	65065693
ENCODE Project	UwDnaseHff	72217528
ENCODE Project	UwDnaseHgf	55400288
ENCODE Project	UwDnaseHipe	68340522
ENCODE Project	UwDnaseHl60	65213936
ENCODE Project	UwDnaseHmec	85932359
ENCODE Project	UwDnaseHmf	67990977
ENCODE Project	UwDnaseHmvecdad	65756685
ENCODE Project	UwDnaseHmvecdblad	91947829
ENCODE Project	UwDnaseHmvecdblneo	119411424
ENCODE Project	UwDnaseHmvecdlyad	94201468
ENCODE Project	UwDnaseHmvecdlyneo	94770814
ENCODE Project	UwDnaseHmvecdneo	81535679
ENCODE Project	UwDnaseHmveclbl	94206726
ENCODE Project	UwDnaseHmveclly	91805274
ENCODE Project	UwDnaseHnpce	60581307
ENCODE Project	UwDnaseHpaec	33475650
ENCODE Project	UwDnaseHpaf	86004931
ENCODE Project	UwDnaseHpdlf	49774741
ENCODE Project	UwDnaseHpf	72435601
ENCODE Project	UwDnaseHrce	50524078
ENCODE Project	UwDnaseHre	52599905
ENCODE Project	UwDnaseHrgec	45374246
ENCODE Project	UwDnaseHrpe	70816228
ENCODE Project	UwDnaseHs27a	36180301
ENCODE Project	UwDnaseHs5	43084782
ENCODE Project	UwDnaseHsmmt	66298549
ENCODE Project	UwDnaseHsmm	89898508
ENCODE Project	UwDnaseHuvec	57854986
ENCODE Project	UwDnaseHvmf	46495930
ENCODE Project	UwDnaseJurkat	100058230
ENCODE Project	UwDnaseK562	66663833
ENCODE Project	UwDnaseK562Znf2c10c5	173334710
ENCODE Project	UwDnaseK562Znf4c50c4	82579248
ENCODE Project	UwDnaseK562Znf4g7d3	83034666
ENCODE Project	UwDnaseK562Znfa41c6	99106982
ENCODE Project	UwDnaseK562Znfb34a8	95113477
ENCODE Project	UwDnaseK562Znfe103c6	78100059
ENCODE Project	UwDnaseK562Znff41b2	109124530
ENCODE Project	UwDnaseK562Znfg54a11	76873233
ENCODE Project	UwDnaseK562Znfp5	70400753
ENCODE Project	UwDnaseLhcnm2Diff4d	120358716
ENCODE Project	UwDnaseLhcnm2	89558023
ENCODE Project	UwDnaseLncap	99877311
ENCODE Project	UwDnaseM059j	114440538
ENCODE Project	UwDnaseMcf7Est100nm1h	164440979
ENCODE Project	UwDnaseMcf7Estctrl0h	151170758
ENCODE Project	UwDnaseMcf7	89482120
ENCODE Project	UwDnaseMonocd14ro1746	178966599
ENCODE Project	UwDnaseMonocd14	33322702
ENCODE Project	UwDnaseMsc	67489377
ENCODE Project	UwDnaseNb4	69651206
ENCODE Project	UwDnaseNha	66930317
ENCODE Project	UwDnaseNhbera	84332771
ENCODE Project	UwDnaseNhdfad	87096679
ENCODE Project	UwDnaseNhdfneo	78227429
ENCODE Project	UwDnaseNhek	66233877
ENCODE Project	UwDnaseNhlf	73119806
ENCODE Project	UwDnaseNt2d1	61069632
ENCODE Project	UwDnasePanc1	53281670
ENCODE Project	UwDnasePrec	71149233
ENCODE Project	UwDnaseRpmi7951	83219182
ENCODE Project	UwDnaseRptec	72052679
ENCODE Project	UwDnaseSaec	48006997
ENCODE Project	UwDnaseSkmc	61493574
ENCODE Project	UwDnaseSknmc	55954708
ENCODE Project	UwDnaseSknshra	50093554
ENCODE Project	UwDnaseT47d	111013251
ENCODE Project	UwDnaseTh17	18274006
ENCODE Project	UwDnaseTh1wb33676984	42020019
ENCODE Project	UwDnaseTh1wb54553204	75915478
ENCODE Project	UwDnaseTh1	112059812
ENCODE Project	UwDnaseTh2wb33676984	28912841
ENCODE Project	UwDnaseTh2wb54553204	43122485
ENCODE Project	UwDnaseTh2	93680573
ENCODE Project	UwDnaseTregwb78495824	40015882
ENCODE Project	UwDnaseTregwb83319432	85202714
ENCODE Project	UwDnaseWerirb1	85948633
ENCODE Project	UwDnaseWi38Ohtam	56063766
ENCODE Project	UwDnaseWi38	54361834
