# Supplementary material for: Which Genetics Variants in DNase-Seq Footprints Are More Likely to Alter Binding?
Source: PLoS Genet. 2016 Feb 22;12(2):e1005875. doi: 10.1371/journal.pgen.1005875 (PMC4764260; doi:10.1371/journal.pgen.1005875)
Supplement: S2 Table — Download dates and, where applicable, specific cell-types/tissues are also listed. (XLSX) [file pgen.1005875.s007.xlsx]

## Sheet: Sheet1
Type	Data Source	Cell-type/Tissue	Date Downloaded
PWM matrices	TRANSFAC	–	2011-11-01
PWM matrices	JASPAR	–	2011-09-23
GWAS Catalot	NIH	–	2013-07-16
LD data	1KG	–	2012-03-29
Gene annotations	Ensembl	–	2012-10-21
ChIP-seq	ENCODE	GM12878	2013-10-28
Genotypes	1KG	GM12878	2013-10-30
SNP annotations	https://github.com/joepickrell/1000-genomes	–	03/2014
