# Supplementary material for: Which Genetics Variants in DNase-Seq Footprints Are More Likely to Alter Binding?
Source: PLoS Genet. 2016 Feb 22;12(2):e1005875. doi: 10.1371/journal.pgen.1005875 (PMC4764260; doi:10.1371/journal.pgen.1005875)
Supplement: S3 Table — For each sample, motifs were determined active if the Z-score, obtained from Equation 2 in S1 Text, was > 5, and if the motif instances showed correlation with DHS peaks (Section 3.2 in S1 Text). (XLSX) [file pgen.1005875.s008.xlsx]

## Sheet: Sheet1
Sample	Motif
EpiUwRmapDNaseBreast.vHMEC.SRX081373	M00005
EpiUwRmapDNaseBreast.vHMEC.SRX081373	M00007
EpiUwRmapDNaseBreast.vHMEC.SRX081373	M00008
EpiUwRmapDNaseBreast.vHMEC.SRX081373	M00011
EpiUwRmapDNaseBreast.vHMEC.SRX081373	M00014
EpiUwRmapDNaseBreast.vHMEC.SRX081373	M00016
EpiUwRmapDNaseBreast.vHMEC.SRX081373	M00017
EpiUwRmapDNaseBreast.vHMEC.SRX081373	M00025
EpiUwRmapDNaseBreast.vHMEC.SRX081373	M00026
EpiUwRmapDNaseBreast.vHMEC.SRX081373	M00032
EpiUwRmapDNaseBreast.vHMEC.SRX081373	M00034
EpiUwRmapDNaseBreast.vHMEC.SRX081373	M00035
EpiUwRmapDNaseBreast.vHMEC.SRX081373	M00036
EpiUwRmapDNaseBreast.vHMEC.SRX081373	M00037
EpiUwRmapDNaseBreast.vHMEC.SRX081373	M00038
EpiUwRmapDNaseBreast.vHMEC.SRX081373	M00039
EpiUwRmapDNaseBreast.vHMEC.SRX081373	M00040
EpiUwRmapDNaseBreast.vHMEC.SRX081373	M00041
EpiUwRmapDNaseBreast.vHMEC.SRX081373	M00043
EpiUwRmapDNaseBreast.vHMEC.SRX081373	M00045
EpiUwRmapDNaseBreast.vHMEC.SRX081373	M00049
EpiUwRmapDNaseBreast.vHMEC.SRX081373	M00050
EpiUwRmapDNaseBreast.vHMEC.SRX081373	M00051
EpiUwRmapDNaseBreast.vHMEC.SRX081373	M00052
EpiUwRmapDNaseBreast.vHMEC.SRX081373	M00053
EpiUwRmapDNaseBreast.vHMEC.SRX081373	M00054
EpiUwRmapDNaseBreast.vHMEC.SRX081373	M00055
EpiUwRmapDNaseBreast.vHMEC.SRX081373	M00056
EpiUwRmapDNaseBreast.vHMEC.SRX081373	M00062
EpiUwRmapDNaseBreast.vHMEC.SRX081373	M00063
EpiUwRmapDNaseBreast.vHMEC.SRX081373	M00064
EpiUwRmapDNaseBreast.vHMEC.SRX081373	M00067
EpiUwRmapDNaseBreast.vHMEC.SRX081373	M00069
EpiUwRmapDNaseBreast.vHMEC.SRX081373	M00074
EpiUwRmapDNaseBreast.vHMEC.SRX081373	M00108
EpiUwRmapDNaseBreast.vHMEC.SRX081373	M00109
EpiUwRmapDNaseBreast.vHMEC.SRX081373	M00113
EpiUwRmapDNaseBreast.vHMEC.SRX081373	M00114
EpiUwRmapDNaseBreast.vHMEC.SRX081373	M00115
EpiUwRmapDNaseBreast.vHMEC.SRX081373	M00116
EpiUwRmapDNaseBreast.vHMEC.SRX081373	M00117
EpiUwRmapDNaseBreast.vHMEC.SRX081373	M00118
EpiUwRmapDNaseBreast.vHMEC.SRX081373	M00119
EpiUwRmapDNaseBreast.vHMEC.SRX081373	M00121
EpiUwRmapDNaseBreast.vHMEC.SRX081373	M00123
EpiUwRmapDNaseBreast.vHMEC.SRX081373	M00131
EpiUwRmapDNaseBreast.vHMEC.SRX081373	M00139
EpiUwRmapDNaseBreast.vHMEC.SRX081373	M00151
EpiUwRmapDNaseBreast.vHMEC.SRX081373	M00152
EpiUwRmapDNaseBreast.vHMEC.SRX081373	M00171
EpiUwRmapDNaseBreast.vHMEC.SRX081373	M00172
EpiUwRmapDNaseBreast.vHMEC.SRX081373	M00173
EpiUwRmapDNaseBreast.vHMEC.SRX081373	M00174
EpiUwRmapDNaseBreast.vHMEC.SRX081373	M00177
EpiUwRmapDNaseBreast.vHMEC.SRX081373	M00178
EpiUwRmapDNaseBreast.vHMEC.SRX081373	M00179
EpiUwRmapDNaseBreast.vHMEC.SRX081373	M00182
EpiUwRmapDNaseBreast.vHMEC.SRX081373	M00186
EpiUwRmapDNaseBreast.vHMEC.SRX081373	M00187
EpiUwRmapDNaseBreast.vHMEC.SRX081373	M00188
EpiUwRmapDNaseBreast.vHMEC.SRX081373	M00193
EpiUwRmapDNaseBreast.vHMEC.SRX081373	M00194
EpiUwRmapDNaseBreast.vHMEC.SRX081373	M00198
EpiUwRmapDNaseBreast.vHMEC.SRX081373	M00199
EpiUwRmapDNaseBreast.vHMEC.SRX081373	M00204
EpiUwRmapDNaseBreast.vHMEC.SRX081373	M00208
EpiUwRmapDNaseBreast.vHMEC.SRX081373	M00215
EpiUwRmapDNaseBreast.vHMEC.SRX081373	M00217
EpiUwRmapDNaseBreast.vHMEC.SRX081373	M00220
EpiUwRmapDNaseBreast.vHMEC.SRX081373	M00224
EpiUwRmapDNaseBreast.vHMEC.SRX081373	M00227
EpiUwRmapDNaseBreast.vHMEC.SRX081373	M00228
EpiUwRmapDNaseBreast.vHMEC.SRX081373	M00231
EpiUwRmapDNaseBreast.vHMEC.SRX081373	M00235
EpiUwRmapDNaseBreast.vHMEC.SRX081373	M00236
EpiUwRmapDNaseBreast.vHMEC.SRX081373	M00237
EpiUwRmapDNaseBreast.vHMEC.SRX081373	M00243
EpiUwRmapDNaseBreast.vHMEC.SRX081373	M00244
EpiUwRmapDNaseBreast.vHMEC.SRX081373	M00245
EpiUwRmapDNaseBreast.vHMEC.SRX081373	M00246
EpiUwRmapDNaseBreast.vHMEC.SRX081373	M00251
EpiUwRmapDNaseBreast.vHMEC.SRX081373	M00254
EpiUwRmapDNaseBreast.vHMEC.SRX081373	M00255
EpiUwRmapDNaseBreast.vHMEC.SRX081373	M00256
EpiUwRmapDNaseBreast.vHMEC.SRX081373	M00258
EpiUwRmapDNaseBreast.vHMEC.SRX081373	M00260
EpiUwRmapDNaseBreast.vHMEC.SRX081373	M00262
EpiUwRmapDNaseBreast.vHMEC.SRX081373	M00263
EpiUwRmapDNaseBreast.vHMEC.SRX081373	M00264
EpiUwRmapDNaseBreast.vHMEC.SRX081373	M00266
EpiUwRmapDNaseBreast.vHMEC.SRX081373	M00271
EpiUwRmapDNaseBreast.vHMEC.SRX081373	M00272
EpiUwRmapDNaseBreast.vHMEC.SRX081373	M00279
EpiUwRmapDNaseBreast.vHMEC.SRX081373	M00280
EpiUwRmapDNaseBreast.vHMEC.SRX081373	M00281
EpiUwRmapDNaseBreast.vHMEC.SRX081373	M00284
EpiUwRmapDNaseBreast.vHMEC.SRX081373	M00287
EpiUwRmapDNaseBreast.vHMEC.SRX081373	M00288
EpiUwRmapDNaseBreast.vHMEC.SRX081373	M00292
EpiUwRmapDNaseBreast.vHMEC.SRX081373	M00303
EpiUwRmapDNaseBreast.vHMEC.SRX081373	M00307
EpiUwRmapDNaseBreast.vHMEC.SRX081373	M00311
EpiUwRmapDNaseBreast.vHMEC.SRX081373	M00312
EpiUwRmapDNaseBreast.vHMEC.SRX081373	M00319
EpiUwRmapDNaseBreast.vHMEC.SRX081373	M00321
EpiUwRmapDNaseBreast.vHMEC.SRX081373	M00322
EpiUwRmapDNaseBreast.vHMEC.SRX081373	M00325
EpiUwRmapDNaseBreast.vHMEC.SRX081373	M00327
EpiUwRmapDNaseBreast.vHMEC.SRX081373	M00332
EpiUwRmapDNaseBreast.vHMEC.SRX081373	M00333
EpiUwRmapDNaseBreast.vHMEC.SRX081373	M00338
EpiUwRmapDNaseBreast.vHMEC.SRX081373	M00339
EpiUwRmapDNaseBreast.vHMEC.SRX081373	M00340
EpiUwRmapDNaseBreast.vHMEC.SRX081373	M00341
EpiUwRmapDNaseBreast.vHMEC.SRX081373	M00342
EpiUwRmapDNaseBreast.vHMEC.SRX081373	M00345
EpiUwRmapDNaseBreast.vHMEC.SRX081373	M00356
EpiUwRmapDNaseBreast.vHMEC.SRX081373	M00357
EpiUwRmapDNaseBreast.vHMEC.SRX081373	M00358
EpiUwRmapDNaseBreast.vHMEC.SRX081373	M00361
EpiUwRmapDNaseBreast.vHMEC.SRX081373	M00366
EpiUwRmapDNaseBreast.vHMEC.SRX081373	M00367
EpiUwRmapDNaseBreast.vHMEC.SRX081373	M00369
EpiUwRmapDNaseBreast.vHMEC.SRX081373	M00370
EpiUwRmapDNaseBreast.vHMEC.SRX081373	M00371
EpiUwRmapDNaseBreast.vHMEC.SRX081373	M00375
EpiUwRmapDNaseBreast.vHMEC.SRX081373	M00376
EpiUwRmapDNaseBreast.vHMEC.SRX081373	M00391
EpiUwRmapDNaseBreast.vHMEC.SRX081373	M00392
EpiUwRmapDNaseBreast.vHMEC.SRX081373	M00393
EpiUwRmapDNaseBreast.vHMEC.SRX081373	M00398
EpiUwRmapDNaseBreast.vHMEC.SRX081373	M00399
EpiUwRmapDNaseBreast.vHMEC.SRX081373	M00400
EpiUwRmapDNaseBreast.vHMEC.SRX081373	M00401
EpiUwRmapDNaseBreast.vHMEC.SRX081373	M00425
EpiUwRmapDNaseBreast.vHMEC.SRX081373	M00426
EpiUwRmapDNaseBreast.vHMEC.SRX081373	M00427
EpiUwRmapDNaseBreast.vHMEC.SRX081373	M00428
EpiUwRmapDNaseBreast.vHMEC.SRX081373	M00430
EpiUwRmapDNaseBreast.vHMEC.SRX081373	M00431
EpiUwRmapDNaseBreast.vHMEC.SRX081373	M00434
EpiUwRmapDNaseBreast.vHMEC.SRX081373	M00435
EpiUwRmapDNaseBreast.vHMEC.SRX081373	M00440
EpiUwRmapDNaseBreast.vHMEC.SRX081373	M00442
EpiUwRmapDNaseBreast.vHMEC.SRX081373	M00466
EpiUwRmapDNaseBreast.vHMEC.SRX081373	M00469
EpiUwRmapDNaseBreast.vHMEC.SRX081373	M00470
EpiUwRmapDNaseBreast.vHMEC.SRX081373	M00481
EpiUwRmapDNaseBreast.vHMEC.SRX081373	M00482
EpiUwRmapDNaseBreast.vHMEC.SRX081373	M00483
EpiUwRmapDNaseBreast.vHMEC.SRX081373	M00490
EpiUwRmapDNaseBreast.vHMEC.SRX081373	M00491
EpiUwRmapDNaseBreast.vHMEC.SRX081373	M00495
EpiUwRmapDNaseBreast.vHMEC.SRX081373	M00507
EpiUwRmapDNaseBreast.vHMEC.SRX081373	M00513
EpiUwRmapDNaseBreast.vHMEC.SRX081373	M00514
EpiUwRmapDNaseBreast.vHMEC.SRX081373	M00516
EpiUwRmapDNaseBreast.vHMEC.SRX081373	M00517
EpiUwRmapDNaseBreast.vHMEC.SRX081373	M00531
EpiUwRmapDNaseBreast.vHMEC.SRX081373	M00538
EpiUwRmapDNaseBreast.vHMEC.SRX081373	M00539
EpiUwRmapDNaseBreast.vHMEC.SRX081373	M00615
EpiUwRmapDNaseBreast.vHMEC.SRX081373	M00621
EpiUwRmapDNaseBreast.vHMEC.SRX081373	M00626
EpiUwRmapDNaseBreast.vHMEC.SRX081373	M00651
EpiUwRmapDNaseBreast.vHMEC.SRX081373	M00652
EpiUwRmapDNaseBreast.vHMEC.SRX081373	M00653
EpiUwRmapDNaseBreast.vHMEC.SRX081373	M00654
EpiUwRmapDNaseBreast.vHMEC.SRX081373	M00655
EpiUwRmapDNaseBreast.vHMEC.SRX081373	M00660
EpiUwRmapDNaseBreast.vHMEC.SRX081373	M00678
EpiUwRmapDNaseBreast.vHMEC.SRX081373	M00683
EpiUwRmapDNaseBreast.vHMEC.SRX081373	M00687
EpiUwRmapDNaseBreast.vHMEC.SRX081373	M00691
EpiUwRmapDNaseBreast.vHMEC.SRX081373	M00694
EpiUwRmapDNaseBreast.vHMEC.SRX081373	M00695
EpiUwRmapDNaseBreast.vHMEC.SRX081373	M00697
EpiUwRmapDNaseBreast.vHMEC.SRX081373	M00699
EpiUwRmapDNaseBreast.vHMEC.SRX081373	M00704
EpiUwRmapDNaseBreast.vHMEC.SRX081373	M00711
EpiUwRmapDNaseBreast.vHMEC.SRX081373	M00716
EpiUwRmapDNaseBreast.vHMEC.SRX081373	M00722
EpiUwRmapDNaseBreast.vHMEC.SRX081373	M00726
EpiUwRmapDNaseBreast.vHMEC.SRX081373	M00730
EpiUwRmapDNaseBreast.vHMEC.SRX081373	M00731
EpiUwRmapDNaseBreast.vHMEC.SRX081373	M00736
EpiUwRmapDNaseBreast.vHMEC.SRX081373	M00737
EpiUwRmapDNaseBreast.vHMEC.SRX081373	M00738
EpiUwRmapDNaseBreast.vHMEC.SRX081373	M00739
EpiUwRmapDNaseBreast.vHMEC.SRX081373	M00740
EpiUwRmapDNaseBreast.vHMEC.SRX081373	M00746
EpiUwRmapDNaseBreast.vHMEC.SRX081373	M00751
EpiUwRmapDNaseBreast.vHMEC.SRX081373	M00752
EpiUwRmapDNaseBreast.vHMEC.SRX081373	M00769
EpiUwRmapDNaseBreast.vHMEC.SRX081373	M00771
EpiUwRmapDNaseBreast.vHMEC.SRX081373	M00772
EpiUwRmapDNaseBreast.vHMEC.SRX081373	M00774
EpiUwRmapDNaseBreast.vHMEC.SRX081373	M00775
EpiUwRmapDNaseBreast.vHMEC.SRX081373	M00778
EpiUwRmapDNaseBreast.vHMEC.SRX081373	M00788
EpiUwRmapDNaseBreast.vHMEC.SRX081373	M00790
EpiUwRmapDNaseBreast.vHMEC.SRX081373	M00793
EpiUwRmapDNaseBreast.vHMEC.SRX081373	M00796
EpiUwRmapDNaseBreast.vHMEC.SRX081373	M00797
EpiUwRmapDNaseBreast.vHMEC.SRX081373	M00799
EpiUwRmapDNaseBreast.vHMEC.SRX081373	M00800
EpiUwRmapDNaseBreast.vHMEC.SRX081373	M00801
EpiUwRmapDNaseBreast.vHMEC.SRX081373	M00803
EpiUwRmapDNaseBreast.vHMEC.SRX081373	M00806
EpiUwRmapDNaseBreast.vHMEC.SRX081373	M00807
EpiUwRmapDNaseBreast.vHMEC.SRX081373	M00809
EpiUwRmapDNaseBreast.vHMEC.SRX081373	M00810
EpiUwRmapDNaseBreast.vHMEC.SRX081373	M00821
EpiUwRmapDNaseBreast.vHMEC.SRX081373	M00912
EpiUwRmapDNaseBreast.vHMEC.SRX081373	M00915
EpiUwRmapDNaseBreast.vHMEC.SRX081373	M00916
EpiUwRmapDNaseBreast.vHMEC.SRX081373	M00917
EpiUwRmapDNaseBreast.vHMEC.SRX081373	M00918
EpiUwRmapDNaseBreast.vHMEC.SRX081373	M00919
EpiUwRmapDNaseBreast.vHMEC.SRX081373	M00920
EpiUwRmapDNaseBreast.vHMEC.SRX081373	M00922
EpiUwRmapDNaseBreast.vHMEC.SRX081373	M00924
EpiUwRmapDNaseBreast.vHMEC.SRX081373	M00925
EpiUwRmapDNaseBreast.vHMEC.SRX081373	M00926
EpiUwRmapDNaseBreast.vHMEC.SRX081373	M00932
EpiUwRmapDNaseBreast.vHMEC.SRX081373	M00933
EpiUwRmapDNaseBreast.vHMEC.SRX081373	M00936
EpiUwRmapDNaseBreast.vHMEC.SRX081373	M00938
EpiUwRmapDNaseBreast.vHMEC.SRX081373	M00939
EpiUwRmapDNaseBreast.vHMEC.SRX081373	M00940
EpiUwRmapDNaseBreast.vHMEC.SRX081373	M00941
EpiUwRmapDNaseBreast.vHMEC.SRX081373	M00942
EpiUwRmapDNaseBreast.vHMEC.SRX081373	M00943
EpiUwRmapDNaseBreast.vHMEC.SRX081373	M00944
EpiUwRmapDNaseBreast.vHMEC.SRX081373	M00945
EpiUwRmapDNaseBreast.vHMEC.SRX081373	M00946
EpiUwRmapDNaseBreast.vHMEC.SRX081373	M00953
EpiUwRmapDNaseBreast.vHMEC.SRX081373	M00954
EpiUwRmapDNaseBreast.vHMEC.SRX081373	M00958
EpiUwRmapDNaseBreast.vHMEC.SRX081373	M00971
EpiUwRmapDNaseBreast.vHMEC.SRX081373	M00972
EpiUwRmapDNaseBreast.vHMEC.SRX081373	M00976
EpiUwRmapDNaseBreast.vHMEC.SRX081373	M00981
EpiUwRmapDNaseBreast.vHMEC.SRX081373	M00982
EpiUwRmapDNaseBreast.vHMEC.SRX081373	M00983
EpiUwRmapDNaseBreast.vHMEC.SRX081373	M00984
EpiUwRmapDNaseBreast.vHMEC.SRX081373	M00985
EpiUwRmapDNaseBreast.vHMEC.SRX081373	M00986
EpiUwRmapDNaseBreast.vHMEC.SRX081373	M01001
EpiUwRmapDNaseBreast.vHMEC.SRX081373	M01002
EpiUwRmapDNaseBreast.vHMEC.SRX081373	M01007
EpiUwRmapDNaseBreast.vHMEC.SRX081373	M01009
EpiUwRmapDNaseBreast.vHMEC.SRX081373	M01011
EpiUwRmapDNaseBreast.vHMEC.SRX081373	M01028
EpiUwRmapDNaseBreast.vHMEC.SRX081373	M01034
EpiUwRmapDNaseBreast.vHMEC.SRX081373	M01035
EpiUwRmapDNaseBreast.vHMEC.SRX081373	M01045
EpiUwRmapDNaseBreast.vHMEC.SRX081373	M01047
EpiUwRmapDNaseBreast.vHMEC.SRX081373	M01054
EpiUwRmapDNaseBreast.vHMEC.SRX081373	M01057
EpiUwRmapDNaseBreast.vHMEC.SRX081373	M01060
EpiUwRmapDNaseBreast.vHMEC.SRX081373	M01061
EpiUwRmapDNaseBreast.vHMEC.SRX081373	M01063
EpiUwRmapDNaseBreast.vHMEC.SRX081373	M01064
EpiUwRmapDNaseBreast.vHMEC.SRX081373	M01065
EpiUwRmapDNaseBreast.vHMEC.SRX081373	M01066
EpiUwRmapDNaseBreast.vHMEC.SRX081373	M01068
EpiUwRmapDNaseBreast.vHMEC.SRX081373	M01070
EpiUwRmapDNaseBreast.vHMEC.SRX081373	M01072
EpiUwRmapDNaseBreast.vHMEC.SRX081373	M01073
EpiUwRmapDNaseBreast.vHMEC.SRX081373	M01078
EpiUwRmapDNaseBreast.vHMEC.SRX081373	M01080
EpiUwRmapDNaseBreast.vHMEC.SRX081373	M01088
EpiUwRmapDNaseBreast.vHMEC.SRX081373	M01090
EpiUwRmapDNaseBreast.vHMEC.SRX081373	M01096
EpiUwRmapDNaseBreast.vHMEC.SRX081373	M01104
EpiUwRmapDNaseBreast.vHMEC.SRX081373	M01111
EpiUwRmapDNaseBreast.vHMEC.SRX081373	M01112
EpiUwRmapDNaseBreast.vHMEC.SRX081373	M01113
EpiUwRmapDNaseBreast.vHMEC.SRX081373	M01114
EpiUwRmapDNaseBreast.vHMEC.SRX081373	M01116
EpiUwRmapDNaseBreast.vHMEC.SRX081373	M01118
EpiUwRmapDNaseBreast.vHMEC.SRX081373	M01122
EpiUwRmapDNaseBreast.vHMEC.SRX081373	M01145
EpiUwRmapDNaseBreast.vHMEC.SRX081373	M01154
EpiUwRmapDNaseBreast.vHMEC.SRX081373	M01156
EpiUwRmapDNaseBreast.vHMEC.SRX081373	M01163
EpiUwRmapDNaseBreast.vHMEC.SRX081373	M01165
EpiUwRmapDNaseBreast.vHMEC.SRX081373	M01167
EpiUwRmapDNaseBreast.vHMEC.SRX081373	M01175
EpiUwRmapDNaseBreast.vHMEC.SRX081373	M01179
EpiUwRmapDNaseBreast.vHMEC.SRX081373	M01180
EpiUwRmapDNaseBreast.vHMEC.SRX081373	M01182
EpiUwRmapDNaseBreast.vHMEC.SRX081373	M01186
EpiUwRmapDNaseBreast.vHMEC.SRX081373	M01187
EpiUwRmapDNaseBreast.vHMEC.SRX081373	M01196
EpiUwRmapDNaseBreast.vHMEC.SRX081373	M01200
EpiUwRmapDNaseBreast.vHMEC.SRX081373	M01201
EpiUwRmapDNaseBreast.vHMEC.SRX081373	M01203
EpiUwRmapDNaseBreast.vHMEC.SRX081373	M01204
EpiUwRmapDNaseBreast.vHMEC.SRX081373	M01208
EpiUwRmapDNaseBreast.vHMEC.SRX081373	M01214
EpiUwRmapDNaseBreast.vHMEC.SRX081373	M01219
EpiUwRmapDNaseBreast.vHMEC.SRX081373	M01223
EpiUwRmapDNaseBreast.vHMEC.SRX081373	M01224
EpiUwRmapDNaseBreast.vHMEC.SRX081373	M01238
EpiUwRmapDNaseBreast.vHMEC.SRX081373	M01239
EpiUwRmapDNaseBreast.vHMEC.SRX081373	M01240
EpiUwRmapDNaseBreast.vHMEC.SRX081373	M01241
EpiUwRmapDNaseBreast.vHMEC.SRX081373	M01243
EpiUwRmapDNaseBreast.vHMEC.SRX081373	M01249
EpiUwRmapDNaseBreast.vHMEC.SRX081373	M01251
EpiUwRmapDNaseBreast.vHMEC.SRX081373	M01256
EpiUwRmapDNaseBreast.vHMEC.SRX081373	M01257
EpiUwRmapDNaseBreast.vHMEC.SRX081373	M01258
EpiUwRmapDNaseBreast.vHMEC.SRX081373	M01259
EpiUwRmapDNaseBreast.vHMEC.SRX081373	M01267
EpiUwRmapDNaseBreast.vHMEC.SRX081373	M01273
EpiUwRmapDNaseBreast.vHMEC.SRX081373	M01298
EpiUwRmapDNaseBreast.vHMEC.SRX081373	M01299
EpiUwRmapDNaseBreast.vHMEC.SRX081373	M01304
EpiUwRmapDNaseBreast.vHMEC.SRX081373	M01305
EpiUwRmapDNaseBreast.vHMEC.SRX081373	M01308
EpiUwRmapDNaseBreast.vHMEC.SRX081373	M01464
EpiUwRmapDNaseBreast.vHMEC.SRX081373	M01492
EpiUwRmapDNaseBreast.vHMEC.SRX081373	M01495
EpiUwRmapDNaseBreast.vHMEC.SRX081373	M01496
EpiUwRmapDNaseBreast.vHMEC.SRX081373	M01499
EpiUwRmapDNaseBreast.vHMEC.SRX081373	M01500
EpiUwRmapDNaseBreast.vHMEC.SRX081373	M01503
EpiUwRmapDNaseBreast.vHMEC.SRX081373	M01509
EpiUwRmapDNaseBreast.vHMEC.SRX081373	M01511
EpiUwRmapDNaseBreast.vHMEC.SRX081373	M01512
EpiUwRmapDNaseBreast.vHMEC.SRX081373	M01513
EpiUwRmapDNaseBreast.vHMEC.SRX081373	M01516
EpiUwRmapDNaseBreast.vHMEC.SRX081373	M01517
EpiUwRmapDNaseBreast.vHMEC.SRX081373	M01518
EpiUwRmapDNaseBreast.vHMEC.SRX081373	M01519
EpiUwRmapDNaseBreast.vHMEC.SRX081373	M01520
EpiUwRmapDNaseBreast.vHMEC.SRX081373	M01521
EpiUwRmapDNaseBreast.vHMEC.SRX081373	M01525
EpiUwRmapDNaseBreast.vHMEC.SRX081373	M01529
EpiUwRmapDNaseBreast.vHMEC.SRX081373	M01530
EpiUwRmapDNaseBreast.vHMEC.SRX081373	M01532
EpiUwRmapDNaseBreast.vHMEC.SRX081373	M01537
EpiUwRmapDNaseBreast.vHMEC.SRX081373	M01538
EpiUwRmapDNaseBreast.vHMEC.SRX081373	M01541
EpiUwRmapDNaseBreast.vHMEC.SRX081373	M01542
EpiUwRmapDNaseBreast.vHMEC.SRX081373	M01544
EpiUwRmapDNaseBreast.vHMEC.SRX081373	M01546
EpiUwRmapDNaseBreast.vHMEC.SRX081373	M01550
EpiUwRmapDNaseBreast.vHMEC.SRX081373	M01551
EpiUwRmapDNaseBreast.vHMEC.SRX081373	M01555
EpiUwRmapDNaseBreast.vHMEC.SRX081373	M01558
EpiUwRmapDNaseBreast.vHMEC.SRX081373	M01559
EpiUwRmapDNaseBreast.vHMEC.SRX081373	M01560
EpiUwRmapDNaseBreast.vHMEC.SRX081373	M01563
EpiUwRmapDNaseBreast.vHMEC.SRX081373	M01564
EpiUwRmapDNaseBreast.vHMEC.SRX081373	M01571
EpiUwRmapDNaseBreast.vHMEC.SRX081373	M01576
EpiUwRmapDNaseBreast.vHMEC.SRX081373	M01577
EpiUwRmapDNaseBreast.vHMEC.SRX081373	M01579
EpiUwRmapDNaseBreast.vHMEC.SRX081373	M01584
EpiUwRmapDNaseBreast.vHMEC.SRX081373	M01585
EpiUwRmapDNaseBreast.vHMEC.SRX081373	M01586
EpiUwRmapDNaseBreast.vHMEC.SRX081373	M01587
EpiUwRmapDNaseBreast.vHMEC.SRX081373	M01588
EpiUwRmapDNaseBreast.vHMEC.SRX081373	M01590
EpiUwRmapDNaseBreast.vHMEC.SRX081373	M01592
EpiUwRmapDNaseBreast.vHMEC.SRX081373	M01593
EpiUwRmapDNaseBreast.vHMEC.SRX081373	M01597
EpiUwRmapDNaseBreast.vHMEC.SRX081373	M01598
EpiUwRmapDNaseBreast.vHMEC.SRX081373	M01600
EpiUwRmapDNaseBreast.vHMEC.SRX081373	M01608
EpiUwRmapDNaseBreast.vHMEC.SRX081373	M01609
EpiUwRmapDNaseBreast.vHMEC.SRX081373	M01610
EpiUwRmapDNaseBreast.vHMEC.SRX081373	M01611
EpiUwRmapDNaseBreast.vHMEC.SRX081373	M01612
EpiUwRmapDNaseBreast.vHMEC.SRX081373	M01613
EpiUwRmapDNaseBreast.vHMEC.SRX081373	M01615
EpiUwRmapDNaseBreast.vHMEC.SRX081373	M01617
EpiUwRmapDNaseBreast.vHMEC.SRX081373	M01620
EpiUwRmapDNaseBreast.vHMEC.SRX081373	M01622
EpiUwRmapDNaseBreast.vHMEC.SRX081373	M01628
EpiUwRmapDNaseBreast.vHMEC.SRX081373	M01629
EpiUwRmapDNaseBreast.vHMEC.SRX081373	M01632
EpiUwRmapDNaseBreast.vHMEC.SRX081373	M01633
EpiUwRmapDNaseBreast.vHMEC.SRX081373	M01634
EpiUwRmapDNaseBreast.vHMEC.SRX081373	M01635
EpiUwRmapDNaseBreast.vHMEC.SRX081373	M01636
EpiUwRmapDNaseBreast.vHMEC.SRX081373	M01639
EpiUwRmapDNaseBreast.vHMEC.SRX081373	M01640
EpiUwRmapDNaseBreast.vHMEC.SRX081373	M01642
EpiUwRmapDNaseBreast.vHMEC.SRX081373	M01643
EpiUwRmapDNaseBreast.vHMEC.SRX081373	M01644
EpiUwRmapDNaseBreast.vHMEC.SRX081373	M01648
EpiUwRmapDNaseBreast.vHMEC.SRX081373	M01649
EpiUwRmapDNaseBreast.vHMEC.SRX081373	M01651
EpiUwRmapDNaseBreast.vHMEC.SRX081373	M01652
EpiUwRmapDNaseBreast.vHMEC.SRX081373	M01655
EpiUwRmapDNaseBreast.vHMEC.SRX081373	M01656
EpiUwRmapDNaseBreast.vHMEC.SRX081373	M01658
EpiUwRmapDNaseBreast.vHMEC.SRX081373	M01660
EpiUwRmapDNaseBreast.vHMEC.SRX081373	M01663
EpiUwRmapDNaseBreast.vHMEC.SRX081373	M01665
EpiUwRmapDNaseBreast.vHMEC.SRX081373	M01673
EpiUwRmapDNaseBreast.vHMEC.SRX081373	M01677
EpiUwRmapDNaseBreast.vHMEC.SRX081373	M01681
EpiUwRmapDNaseBreast.vHMEC.SRX081373	M01683
EpiUwRmapDNaseBreast.vHMEC.SRX081373	M01684
EpiUwRmapDNaseBreast.vHMEC.SRX081373	M01685
EpiUwRmapDNaseBreast.vHMEC.SRX081373	M01688
EpiUwRmapDNaseBreast.vHMEC.SRX081373	M01690
EpiUwRmapDNaseBreast.vHMEC.SRX081373	M01699
EpiUwRmapDNaseBreast.vHMEC.SRX081373	M01700
EpiUwRmapDNaseBreast.vHMEC.SRX081373	M01701
EpiUwRmapDNaseBreast.vHMEC.SRX081373	M01713
EpiUwRmapDNaseBreast.vHMEC.SRX081373	M01715
EpiUwRmapDNaseBreast.vHMEC.SRX081373	M01719
EpiUwRmapDNaseBreast.vHMEC.SRX081373	M01736
EpiUwRmapDNaseBreast.vHMEC.SRX081373	M01742
EpiUwRmapDNaseBreast.vHMEC.SRX081373	M01744
EpiUwRmapDNaseBreast.vHMEC.SRX081373	M01752
EpiUwRmapDNaseBreast.vHMEC.SRX081373	M01759
EpiUwRmapDNaseBreast.vHMEC.SRX081373	M01768
EpiUwRmapDNaseBreast.vHMEC.SRX081373	M01770
EpiUwRmapDNaseBreast.vHMEC.SRX081373	M01772
EpiUwRmapDNaseBreast.vHMEC.SRX081373	M01779
EpiUwRmapDNaseBreast.vHMEC.SRX081373	M01783
EpiUwRmapDNaseBreast.vHMEC.SRX081373	M01793
EpiUwRmapDNaseBreast.vHMEC.SRX081373	M01794
EpiUwRmapDNaseBreast.vHMEC.SRX081373	M01795
EpiUwRmapDNaseBreast.vHMEC.SRX081373	M01806
EpiUwRmapDNaseBreast.vHMEC.SRX081373	M01812
EpiUwRmapDNaseBreast.vHMEC.SRX081373	M01815
EpiUwRmapDNaseBreast.vHMEC.SRX081373	M01816
EpiUwRmapDNaseBreast.vHMEC.SRX081373	M01817
EpiUwRmapDNaseBreast.vHMEC.SRX081373	M01818
EpiUwRmapDNaseBreast.vHMEC.SRX081373	M01820
EpiUwRmapDNaseBreast.vHMEC.SRX081373	M01830
EpiUwRmapDNaseBreast.vHMEC.SRX081373	M01833
EpiUwRmapDNaseBreast.vHMEC.SRX081373	M01837
EpiUwRmapDNaseBreast.vHMEC.SRX081373	M01838
EpiUwRmapDNaseBreast.vHMEC.SRX081373	M01839
EpiUwRmapDNaseBreast.vHMEC.SRX081373	M01840
EpiUwRmapDNaseBreast.vHMEC.SRX081373	M01843
EpiUwRmapDNaseBreast.vHMEC.SRX081373	M01849
EpiUwRmapDNaseBreast.vHMEC.SRX081373	M01852
EpiUwRmapDNaseBreast.vHMEC.SRX081373	M01857
EpiUwRmapDNaseBreast.vHMEC.SRX081373	M01858
EpiUwRmapDNaseBreast.vHMEC.SRX081373	M01861
EpiUwRmapDNaseBreast.vHMEC.SRX081373	M01862
EpiUwRmapDNaseBreast.vHMEC.SRX081373	M01863
EpiUwRmapDNaseBreast.vHMEC.SRX081373	M01864
EpiUwRmapDNaseBreast.vHMEC.SRX081373	M01866
EpiUwRmapDNaseBreast.vHMEC.SRX081373	M01868
EpiUwRmapDNaseBreast.vHMEC.SRX081373	M01869
EpiUwRmapDNaseBreast.vHMEC.SRX081373	M01874
EpiUwRmapDNaseBreast.vHMEC.SRX081373	M01876
EpiUwRmapDNaseBreast.vHMEC.SRX081373	M01881
EpiUwRmapDNaseBreast.vHMEC.SRX081373	M01896
EpiUwRmapDNaseBreast.vHMEC.SRX081373	M01898
EpiUwRmapDNaseBreast.vHMEC.SRX081373	M01899
EpiUwRmapDNaseBreast.vHMEC.SRX081373	M01903
EpiUwRmapDNaseBreast.vHMEC.SRX081373	M01908
EpiUwRmapDNaseBreast.vHMEC.SRX081373	M01909
EpiUwRmapDNaseBreast.vHMEC.SRX081373	M01911
EpiUwRmapDNaseBreast.vHMEC.SRX081373	M01914
EpiUwRmapDNaseBreast.vHMEC.SRX081373	M01916
EpiUwRmapDNaseBreast.vHMEC.SRX081373	M01917
EpiUwRmapDNaseBreast.vHMEC.SRX081373	M01920
EpiUwRmapDNaseBreast.vHMEC.SRX081373	M01924
EpiUwRmapDNaseBreast.vHMEC.SRX081373	M01925
EpiUwRmapDNaseBreast.vHMEC.SRX081373	M01927
EpiUwRmapDNaseBreast.vHMEC.SRX081373	M01928
EpiUwRmapDNaseBreast.vHMEC.SRX081373	M01932
EpiUwRmapDNaseBreast.vHMEC.SRX081373	M01933
EpiUwRmapDNaseBreast.vHMEC.SRX081373	M01934
EpiUwRmapDNaseBreast.vHMEC.SRX081373	M01935
EpiUwRmapDNaseBreast.vHMEC.SRX081373	M01936
EpiUwRmapDNaseBreast.vHMEC.SRX081373	M01938
EpiUwRmapDNaseBreast.vHMEC.SRX081373	M01940
EpiUwRmapDNaseBreast.vHMEC.SRX081373	M01942
EpiUwRmapDNaseBreast.vHMEC.SRX081373	M01944
EpiUwRmapDNaseBreast.vHMEC.SRX081373	M01946
EpiUwRmapDNaseBreast.vHMEC.SRX081373	M01947
EpiUwRmapDNaseBreast.vHMEC.SRX081373	M01948
EpiUwRmapDNaseBreast.vHMEC.SRX081373	M01949
EpiUwRmapDNaseBreast.vHMEC.SRX081373	M01950
EpiUwRmapDNaseBreast.vHMEC.SRX081373	M01951
EpiUwRmapDNaseBreast.vHMEC.SRX081373	M01953
EpiUwRmapDNaseBreast.vHMEC.SRX081373	M01954
EpiUwRmapDNaseBreast.vHMEC.SRX081373	M01957
EpiUwRmapDNaseBreast.vHMEC.SRX081373	M01958
EpiUwRmapDNaseBreast.vHMEC.SRX081373	M01959
EpiUwRmapDNaseBreast.vHMEC.SRX081373	M01960
EpiUwRmapDNaseBreast.vHMEC.SRX081373	M01961
EpiUwRmapDNaseBreast.vHMEC.SRX081373	M01962
EpiUwRmapDNaseBreast.vHMEC.SRX081373	M01963
EpiUwRmapDNaseBreast.vHMEC.SRX081373	M01966
EpiUwRmapDNaseBreast.vHMEC.SRX081373	M01970
EpiUwRmapDNaseBreast.vHMEC.SRX081373	M01972
EpiUwRmapDNaseBreast.vHMEC.SRX081373	M01974
EpiUwRmapDNaseBreast.vHMEC.SRX081373	M01975
EpiUwRmapDNaseBreast.vHMEC.SRX081373	M01976
EpiUwRmapDNaseBreast.vHMEC.SRX081373	M01977
EpiUwRmapDNaseBreast.vHMEC.SRX081373	M01979
EpiUwRmapDNaseBreast.vHMEC.SRX081373	M01980
EpiUwRmapDNaseBreast.vHMEC.SRX081373	M01981
EpiUwRmapDNaseBreast.vHMEC.SRX081373	M01982
EpiUwRmapDNaseBreast.vHMEC.SRX081373	M01983
EpiUwRmapDNaseBreast.vHMEC.SRX081373	M01984
EpiUwRmapDNaseBreast.vHMEC.SRX081373	M01985
EpiUwRmapDNaseBreast.vHMEC.SRX081373	M01986
EpiUwRmapDNaseBreast.vHMEC.SRX081373	M01987
EpiUwRmapDNaseBreast.vHMEC.SRX081373	M01988
EpiUwRmapDNaseBreast.vHMEC.SRX081373	M01989
EpiUwRmapDNaseBreast.vHMEC.SRX081373	M01990
EpiUwRmapDNaseBreast.vHMEC.SRX081373	M01991
EpiUwRmapDNaseBreast.vHMEC.SRX081373	M01992
EpiUwRmapDNaseBreast.vHMEC.SRX081373	M02011
EpiUwRmapDNaseBreast.vHMEC.SRX081373	M02012
EpiUwRmapDNaseBreast.vHMEC.SRX081373	M02032
EpiUwRmapDNaseBreast.vHMEC.SRX081373	M02036
EpiUwRmapDNaseBreast.vHMEC.SRX081373	M02037
EpiUwRmapDNaseBreast.vHMEC.SRX081373	M02038
EpiUwRmapDNaseBreast.vHMEC.SRX081373	M02039
EpiUwRmapDNaseBreast.vHMEC.SRX081373	M02040
EpiUwRmapDNaseBreast.vHMEC.SRX081373	M02041
EpiUwRmapDNaseBreast.vHMEC.SRX081373	M02042
EpiUwRmapDNaseBreast.vHMEC.SRX081373	M02043
EpiUwRmapDNaseBreast.vHMEC.SRX081373	MA0002.2
EpiUwRmapDNaseBreast.vHMEC.SRX081373	MA0003.1
EpiUwRmapDNaseBreast.vHMEC.SRX081373	MA0004.1
EpiUwRmapDNaseBreast.vHMEC.SRX081373	MA0006.1
EpiUwRmapDNaseBreast.vHMEC.SRX081373	MA0007.1
EpiUwRmapDNaseBreast.vHMEC.SRX081373	MA0018.2
EpiUwRmapDNaseBreast.vHMEC.SRX081373	MA0024.1
EpiUwRmapDNaseBreast.vHMEC.SRX081373	MA0028.1
EpiUwRmapDNaseBreast.vHMEC.SRX081373	MA0039.2
EpiUwRmapDNaseBreast.vHMEC.SRX081373	MA0043.1
EpiUwRmapDNaseBreast.vHMEC.SRX081373	MA0047.2
EpiUwRmapDNaseBreast.vHMEC.SRX081373	MA0050.1
EpiUwRmapDNaseBreast.vHMEC.SRX081373	MA0051.1
EpiUwRmapDNaseBreast.vHMEC.SRX081373	MA0052.1
EpiUwRmapDNaseBreast.vHMEC.SRX081373	MA0058.1
EpiUwRmapDNaseBreast.vHMEC.SRX081373	MA0059.1
EpiUwRmapDNaseBreast.vHMEC.SRX081373	MA0060.1
EpiUwRmapDNaseBreast.vHMEC.SRX081373	MA0061.1
EpiUwRmapDNaseBreast.vHMEC.SRX081373	MA0062.2
EpiUwRmapDNaseBreast.vHMEC.SRX081373	MA0067.1
EpiUwRmapDNaseBreast.vHMEC.SRX081373	MA0076.1
EpiUwRmapDNaseBreast.vHMEC.SRX081373	MA0077.1
EpiUwRmapDNaseBreast.vHMEC.SRX081373	MA0079.2
EpiUwRmapDNaseBreast.vHMEC.SRX081373	MA0080.2
EpiUwRmapDNaseBreast.vHMEC.SRX081373	MA0088.1
EpiUwRmapDNaseBreast.vHMEC.SRX081373	MA0090.1
EpiUwRmapDNaseBreast.vHMEC.SRX081373	MA0093.1
EpiUwRmapDNaseBreast.vHMEC.SRX081373	MA0098.1
EpiUwRmapDNaseBreast.vHMEC.SRX081373	MA0099.2
EpiUwRmapDNaseBreast.vHMEC.SRX081373	MA0100.1
EpiUwRmapDNaseBreast.vHMEC.SRX081373	MA0101.1
EpiUwRmapDNaseBreast.vHMEC.SRX081373	MA0102.2
EpiUwRmapDNaseBreast.vHMEC.SRX081373	MA0103.1
EpiUwRmapDNaseBreast.vHMEC.SRX081373	MA0104.2
EpiUwRmapDNaseBreast.vHMEC.SRX081373	MA0105.1
EpiUwRmapDNaseBreast.vHMEC.SRX081373	MA0106.1
EpiUwRmapDNaseBreast.vHMEC.SRX081373	MA0107.1
EpiUwRmapDNaseBreast.vHMEC.SRX081373	MA0117.1
EpiUwRmapDNaseBreast.vHMEC.SRX081373	MA0119.1
EpiUwRmapDNaseBreast.vHMEC.SRX081373	MA0131.1
EpiUwRmapDNaseBreast.vHMEC.SRX081373	MA0138.2
EpiUwRmapDNaseBreast.vHMEC.SRX081373	MA0139.1
EpiUwRmapDNaseBreast.vHMEC.SRX081373	MA0146.1
EpiUwRmapDNaseBreast.vHMEC.SRX081373	MA0147.1
EpiUwRmapDNaseBreast.vHMEC.SRX081373	MA0148.1
EpiUwRmapDNaseBreast.vHMEC.SRX081373	MA0150.1
EpiUwRmapDNaseBreast.vHMEC.SRX081373	MA0156.1
EpiUwRmapDNaseBreast.vHMEC.SRX081373	MA0162.1
EpiUwRmapDNaseBreast.vHMEC.SRX081373	MA0259.1
EpiUwRmapDNaseBreast.vHMEC.SRX081373	PBM0007
EpiUwRmapDNaseBreast.vHMEC.SRX081373	PBM0009
EpiUwRmapDNaseBreast.vHMEC.SRX081373	PBM0010
EpiUwRmapDNaseBreast.vHMEC.SRX081373	PBM0013
EpiUwRmapDNaseBreast.vHMEC.SRX081373	PBM0017
EpiUwRmapDNaseBreast.vHMEC.SRX081373	PBM0018
EpiUwRmapDNaseBreast.vHMEC.SRX081373	PBM0020
EpiUwRmapDNaseBreast.vHMEC.SRX081373	PBM0022
EpiUwRmapDNaseBreast.vHMEC.SRX081373	PBM0023
EpiUwRmapDNaseBreast.vHMEC.SRX081373	PBM0027
EpiUwRmapDNaseBreast.vHMEC.SRX081373	PBM0029
EpiUwRmapDNaseBreast.vHMEC.SRX081373	PBM0034
EpiUwRmapDNaseBreast.vHMEC.SRX081373	PBM0035
EpiUwRmapDNaseBreast.vHMEC.SRX081373	PBM0041
EpiUwRmapDNaseBreast.vHMEC.SRX081373	PBM0043
EpiUwRmapDNaseBreast.vHMEC.SRX081373	PBM0049
EpiUwRmapDNaseBreast.vHMEC.SRX081373	PBM0050
EpiUwRmapDNaseBreast.vHMEC.SRX081373	PBM0052
EpiUwRmapDNaseBreast.vHMEC.SRX081373	PBM0053
EpiUwRmapDNaseBreast.vHMEC.SRX081373	PBM0054
EpiUwRmapDNaseBreast.vHMEC.SRX081373	PBM0057
EpiUwRmapDNaseBreast.vHMEC.SRX081373	PBM0060
EpiUwRmapDNaseBreast.vHMEC.SRX081373	PBM0063
EpiUwRmapDNaseBreast.vHMEC.SRX081373	PBM0065
EpiUwRmapDNaseBreast.vHMEC.SRX081373	PBM0068
EpiUwRmapDNaseBreast.vHMEC.SRX081373	PBM0072
EpiUwRmapDNaseBreast.vHMEC.SRX081373	PBM0074
EpiUwRmapDNaseBreast.vHMEC.SRX081373	PBM0079
EpiUwRmapDNaseBreast.vHMEC.SRX081373	PBM0082
EpiUwRmapDNaseBreast.vHMEC.SRX081373	PBM0083
EpiUwRmapDNaseBreast.vHMEC.SRX081373	PBM0084
EpiUwRmapDNaseBreast.vHMEC.SRX081373	PBM0085
EpiUwRmapDNaseBreast.vHMEC.SRX081373	PBM0086
EpiUwRmapDNaseBreast.vHMEC.SRX081373	PBM0087
EpiUwRmapDNaseBreast.vHMEC.SRX081373	PBM0089
EpiUwRmapDNaseBreast.vHMEC.SRX081373	PBM0090
EpiUwRmapDNaseBreast.vHMEC.SRX081373	PBM0091
EpiUwRmapDNaseBreast.vHMEC.SRX081373	PBM0093
EpiUwRmapDNaseBreast.vHMEC.SRX081373	PBM0094
EpiUwRmapDNaseBreast.vHMEC.SRX081373	PBM0095
EpiUwRmapDNaseBreast.vHMEC.SRX081373	PBM0096
EpiUwRmapDNaseBreast.vHMEC.SRX081373	PBM0097
EpiUwRmapDNaseBreast.vHMEC.SRX081373	PBM0098
EpiUwRmapDNaseBreast.vHMEC.SRX081373	PBM0100
EpiUwRmapDNaseBreast.vHMEC.SRX081373	PBM0101
EpiUwRmapDNaseBreast.vHMEC.SRX081373	PBM0102
EpiUwRmapDNaseBreast.vHMEC.SRX081373	PBM0103
EpiUwRmapDNaseBreast.vHMEC.SRX081373	PBM0104
EpiUwRmapDNaseBreast.vHMEC.SRX081373	PBM0105
EpiUwRmapDNaseBreast.vHMEC.SRX081373	PBM0106
EpiUwRmapDNaseBreast.vHMEC.SRX081373	PBM0107
EpiUwRmapDNaseBreast.vHMEC.SRX081373	PBM0108
EpiUwRmapDNaseBreast.vHMEC.SRX081373	PBM0109
EpiUwRmapDNaseBreast.vHMEC.SRX081373	PBM0110
EpiUwRmapDNaseBreast.vHMEC.SRX081373	PBM0112
EpiUwRmapDNaseBreast.vHMEC.SRX081373	PBM0113
EpiUwRmapDNaseBreast.vHMEC.SRX081373	PBM0114
EpiUwRmapDNaseBreast.vHMEC.SRX081373	PBM0115
EpiUwRmapDNaseBreast.vHMEC.SRX081373	PBM0116
EpiUwRmapDNaseBreast.vHMEC.SRX081373	PBM0117
EpiUwRmapDNaseBreast.vHMEC.SRX081373	PBM0118
EpiUwRmapDNaseBreast.vHMEC.SRX081373	PBM0119
EpiUwRmapDNaseBreast.vHMEC.SRX081373	PBM0120
EpiUwRmapDNaseBreast.vHMEC.SRX081373	PBM0121
EpiUwRmapDNaseBreast.vHMEC.SRX081373	PBM0122
EpiUwRmapDNaseBreast.vHMEC.SRX081373	PBM0123
EpiUwRmapDNaseBreast.vHMEC.SRX081373	PBM0124
EpiUwRmapDNaseBreast.vHMEC.SRX081373	PBM0125
EpiUwRmapDNaseBreast.vHMEC.SRX081373	PBM0126
EpiUwRmapDNaseBreast.vHMEC.SRX081373	PBM0127
EpiUwRmapDNaseBreast.vHMEC.SRX081373	PBM0128
EpiUwRmapDNaseBreast.vHMEC.SRX081373	PBM0129
EpiUwRmapDNaseBreast.vHMEC.SRX081373	PBM0130
EpiUwRmapDNaseBreast.vHMEC.SRX081373	PBM0131
EpiUwRmapDNaseBreast.vHMEC.SRX081373	PBM0132
EpiUwRmapDNaseBreast.vHMEC.SRX081373	PBM0133
EpiUwRmapDNaseBreast.vHMEC.SRX081373	PBM0134
EpiUwRmapDNaseBreast.vHMEC.SRX081373	PBM0135
EpiUwRmapDNaseBreast.vHMEC.SRX081373	PBM0137
EpiUwRmapDNaseBreast.vHMEC.SRX081373	PBM0151
EpiUwRmapDNaseBreast.vHMEC.SRX081373	PBM0171
EpiUwRmapDNaseBreast.vHMEC.SRX081373	PBM0172
EpiUwRmapDNaseBreast.vHMEC.SRX081373	PBM0175
EpiUwRmapDNaseBreast.vHMEC.SRX081373	PBM0188
EpiUwRmapDNaseBreast.vHMEC.SRX081373	PBM0190
EpiUwRmapDNaseBreast.vHMEC.SRX081373	PBM0195
EpiUwRmapDNaseBreast.vHMEC.SRX081373	PBM0200
EpiUwRmapDNaseBreast.vHMEC.SRX081373	PBM0203
EpiUwRmapDNaseBreast.vHMEC.SRX081374	M00005
EpiUwRmapDNaseBreast.vHMEC.SRX081374	M00007
EpiUwRmapDNaseBreast.vHMEC.SRX081374	M00008
EpiUwRmapDNaseBreast.vHMEC.SRX081374	M00013
EpiUwRmapDNaseBreast.vHMEC.SRX081374	M00014
EpiUwRmapDNaseBreast.vHMEC.SRX081374	M00016
EpiUwRmapDNaseBreast.vHMEC.SRX081374	M00017
EpiUwRmapDNaseBreast.vHMEC.SRX081374	M00025
EpiUwRmapDNaseBreast.vHMEC.SRX081374	M00026
EpiUwRmapDNaseBreast.vHMEC.SRX081374	M00032
EpiUwRmapDNaseBreast.vHMEC.SRX081374	M00034
EpiUwRmapDNaseBreast.vHMEC.SRX081374	M00035
EpiUwRmapDNaseBreast.vHMEC.SRX081374	M00036
EpiUwRmapDNaseBreast.vHMEC.SRX081374	M00037
EpiUwRmapDNaseBreast.vHMEC.SRX081374	M00038
EpiUwRmapDNaseBreast.vHMEC.SRX081374	M00039
EpiUwRmapDNaseBreast.vHMEC.SRX081374	M00040
EpiUwRmapDNaseBreast.vHMEC.SRX081374	M00041
EpiUwRmapDNaseBreast.vHMEC.SRX081374	M00043
EpiUwRmapDNaseBreast.vHMEC.SRX081374	M00045
EpiUwRmapDNaseBreast.vHMEC.SRX081374	M00049
EpiUwRmapDNaseBreast.vHMEC.SRX081374	M00050
EpiUwRmapDNaseBreast.vHMEC.SRX081374	M00051
EpiUwRmapDNaseBreast.vHMEC.SRX081374	M00052
EpiUwRmapDNaseBreast.vHMEC.SRX081374	M00053
EpiUwRmapDNaseBreast.vHMEC.SRX081374	M00054
EpiUwRmapDNaseBreast.vHMEC.SRX081374	M00055
EpiUwRmapDNaseBreast.vHMEC.SRX081374	M00056
EpiUwRmapDNaseBreast.vHMEC.SRX081374	M00062
EpiUwRmapDNaseBreast.vHMEC.SRX081374	M00063
EpiUwRmapDNaseBreast.vHMEC.SRX081374	M00064
EpiUwRmapDNaseBreast.vHMEC.SRX081374	M00067
EpiUwRmapDNaseBreast.vHMEC.SRX081374	M00069
EpiUwRmapDNaseBreast.vHMEC.SRX081374	M00074
EpiUwRmapDNaseBreast.vHMEC.SRX081374	M00104
EpiUwRmapDNaseBreast.vHMEC.SRX081374	M00108
EpiUwRmapDNaseBreast.vHMEC.SRX081374	M00109
EpiUwRmapDNaseBreast.vHMEC.SRX081374	M00113
EpiUwRmapDNaseBreast.vHMEC.SRX081374	M00114
EpiUwRmapDNaseBreast.vHMEC.SRX081374	M00115
EpiUwRmapDNaseBreast.vHMEC.SRX081374	M00116
EpiUwRmapDNaseBreast.vHMEC.SRX081374	M00117
EpiUwRmapDNaseBreast.vHMEC.SRX081374	M00118
EpiUwRmapDNaseBreast.vHMEC.SRX081374	M00119
EpiUwRmapDNaseBreast.vHMEC.SRX081374	M00121
EpiUwRmapDNaseBreast.vHMEC.SRX081374	M00123
EpiUwRmapDNaseBreast.vHMEC.SRX081374	M00139
EpiUwRmapDNaseBreast.vHMEC.SRX081374	M00140
EpiUwRmapDNaseBreast.vHMEC.SRX081374	M00151
EpiUwRmapDNaseBreast.vHMEC.SRX081374	M00152
EpiUwRmapDNaseBreast.vHMEC.SRX081374	M00171
EpiUwRmapDNaseBreast.vHMEC.SRX081374	M00172
EpiUwRmapDNaseBreast.vHMEC.SRX081374	M00173
EpiUwRmapDNaseBreast.vHMEC.SRX081374	M00174
EpiUwRmapDNaseBreast.vHMEC.SRX081374	M00177
EpiUwRmapDNaseBreast.vHMEC.SRX081374	M00178
EpiUwRmapDNaseBreast.vHMEC.SRX081374	M00179
EpiUwRmapDNaseBreast.vHMEC.SRX081374	M00182
EpiUwRmapDNaseBreast.vHMEC.SRX081374	M00186
EpiUwRmapDNaseBreast.vHMEC.SRX081374	M00187
EpiUwRmapDNaseBreast.vHMEC.SRX081374	M00188
EpiUwRmapDNaseBreast.vHMEC.SRX081374	M00190
EpiUwRmapDNaseBreast.vHMEC.SRX081374	M00193
EpiUwRmapDNaseBreast.vHMEC.SRX081374	M00194
EpiUwRmapDNaseBreast.vHMEC.SRX081374	M00198
EpiUwRmapDNaseBreast.vHMEC.SRX081374	M00199
EpiUwRmapDNaseBreast.vHMEC.SRX081374	M00201
EpiUwRmapDNaseBreast.vHMEC.SRX081374	M00204
EpiUwRmapDNaseBreast.vHMEC.SRX081374	M00208
EpiUwRmapDNaseBreast.vHMEC.SRX081374	M00215
EpiUwRmapDNaseBreast.vHMEC.SRX081374	M00217
EpiUwRmapDNaseBreast.vHMEC.SRX081374	M00220
EpiUwRmapDNaseBreast.vHMEC.SRX081374	M00224
EpiUwRmapDNaseBreast.vHMEC.SRX081374	M00227
EpiUwRmapDNaseBreast.vHMEC.SRX081374	M00228
EpiUwRmapDNaseBreast.vHMEC.SRX081374	M00231
EpiUwRmapDNaseBreast.vHMEC.SRX081374	M00236
EpiUwRmapDNaseBreast.vHMEC.SRX081374	M00237
EpiUwRmapDNaseBreast.vHMEC.SRX081374	M00243
EpiUwRmapDNaseBreast.vHMEC.SRX081374	M00244
EpiUwRmapDNaseBreast.vHMEC.SRX081374	M00245
EpiUwRmapDNaseBreast.vHMEC.SRX081374	M00246
EpiUwRmapDNaseBreast.vHMEC.SRX081374	M00251
EpiUwRmapDNaseBreast.vHMEC.SRX081374	M00254
EpiUwRmapDNaseBreast.vHMEC.SRX081374	M00255
EpiUwRmapDNaseBreast.vHMEC.SRX081374	M00256
EpiUwRmapDNaseBreast.vHMEC.SRX081374	M00258
EpiUwRmapDNaseBreast.vHMEC.SRX081374	M00260
EpiUwRmapDNaseBreast.vHMEC.SRX081374	M00262
EpiUwRmapDNaseBreast.vHMEC.SRX081374	M00263
EpiUwRmapDNaseBreast.vHMEC.SRX081374	M00264
EpiUwRmapDNaseBreast.vHMEC.SRX081374	M00271
EpiUwRmapDNaseBreast.vHMEC.SRX081374	M00272
EpiUwRmapDNaseBreast.vHMEC.SRX081374	M00279
EpiUwRmapDNaseBreast.vHMEC.SRX081374	M00280
EpiUwRmapDNaseBreast.vHMEC.SRX081374	M00281
EpiUwRmapDNaseBreast.vHMEC.SRX081374	M00284
EpiUwRmapDNaseBreast.vHMEC.SRX081374	M00285
EpiUwRmapDNaseBreast.vHMEC.SRX081374	M00287
EpiUwRmapDNaseBreast.vHMEC.SRX081374	M00292
EpiUwRmapDNaseBreast.vHMEC.SRX081374	M00303
EpiUwRmapDNaseBreast.vHMEC.SRX081374	M00305
EpiUwRmapDNaseBreast.vHMEC.SRX081374	M00307
EpiUwRmapDNaseBreast.vHMEC.SRX081374	M00321
EpiUwRmapDNaseBreast.vHMEC.SRX081374	M00322
EpiUwRmapDNaseBreast.vHMEC.SRX081374	M00325
EpiUwRmapDNaseBreast.vHMEC.SRX081374	M00327
EpiUwRmapDNaseBreast.vHMEC.SRX081374	M00331
EpiUwRmapDNaseBreast.vHMEC.SRX081374	M00332
EpiUwRmapDNaseBreast.vHMEC.SRX081374	M00333
EpiUwRmapDNaseBreast.vHMEC.SRX081374	M00338
EpiUwRmapDNaseBreast.vHMEC.SRX081374	M00339
EpiUwRmapDNaseBreast.vHMEC.SRX081374	M00340
EpiUwRmapDNaseBreast.vHMEC.SRX081374	M00341
EpiUwRmapDNaseBreast.vHMEC.SRX081374	M00345
EpiUwRmapDNaseBreast.vHMEC.SRX081374	M00356
EpiUwRmapDNaseBreast.vHMEC.SRX081374	M00357
EpiUwRmapDNaseBreast.vHMEC.SRX081374	M00358
EpiUwRmapDNaseBreast.vHMEC.SRX081374	M00361
EpiUwRmapDNaseBreast.vHMEC.SRX081374	M00366
EpiUwRmapDNaseBreast.vHMEC.SRX081374	M00367
EpiUwRmapDNaseBreast.vHMEC.SRX081374	M00369
EpiUwRmapDNaseBreast.vHMEC.SRX081374	M00370
EpiUwRmapDNaseBreast.vHMEC.SRX081374	M00371
EpiUwRmapDNaseBreast.vHMEC.SRX081374	M00372
EpiUwRmapDNaseBreast.vHMEC.SRX081374	M00375
EpiUwRmapDNaseBreast.vHMEC.SRX081374	M00376
EpiUwRmapDNaseBreast.vHMEC.SRX081374	M00391
EpiUwRmapDNaseBreast.vHMEC.SRX081374	M00393
EpiUwRmapDNaseBreast.vHMEC.SRX081374	M00398
EpiUwRmapDNaseBreast.vHMEC.SRX081374	M00399
EpiUwRmapDNaseBreast.vHMEC.SRX081374	M00400
EpiUwRmapDNaseBreast.vHMEC.SRX081374	M00401
EpiUwRmapDNaseBreast.vHMEC.SRX081374	M00425
EpiUwRmapDNaseBreast.vHMEC.SRX081374	M00426
EpiUwRmapDNaseBreast.vHMEC.SRX081374	M00427
EpiUwRmapDNaseBreast.vHMEC.SRX081374	M00428
EpiUwRmapDNaseBreast.vHMEC.SRX081374	M00430
EpiUwRmapDNaseBreast.vHMEC.SRX081374	M00431
EpiUwRmapDNaseBreast.vHMEC.SRX081374	M00434
EpiUwRmapDNaseBreast.vHMEC.SRX081374	M00435
EpiUwRmapDNaseBreast.vHMEC.SRX081374	M00442
EpiUwRmapDNaseBreast.vHMEC.SRX081374	M00465
EpiUwRmapDNaseBreast.vHMEC.SRX081374	M00466
EpiUwRmapDNaseBreast.vHMEC.SRX081374	M00469
EpiUwRmapDNaseBreast.vHMEC.SRX081374	M00470
EpiUwRmapDNaseBreast.vHMEC.SRX081374	M00483
EpiUwRmapDNaseBreast.vHMEC.SRX081374	M00490
EpiUwRmapDNaseBreast.vHMEC.SRX081374	M00491
EpiUwRmapDNaseBreast.vHMEC.SRX081374	M00495
EpiUwRmapDNaseBreast.vHMEC.SRX081374	M00497
EpiUwRmapDNaseBreast.vHMEC.SRX081374	M00507
EpiUwRmapDNaseBreast.vHMEC.SRX081374	M00513
EpiUwRmapDNaseBreast.vHMEC.SRX081374	M00514
EpiUwRmapDNaseBreast.vHMEC.SRX081374	M00516
EpiUwRmapDNaseBreast.vHMEC.SRX081374	M00517
EpiUwRmapDNaseBreast.vHMEC.SRX081374	M00531
EpiUwRmapDNaseBreast.vHMEC.SRX081374	M00538
EpiUwRmapDNaseBreast.vHMEC.SRX081374	M00539
EpiUwRmapDNaseBreast.vHMEC.SRX081374	M00615
EpiUwRmapDNaseBreast.vHMEC.SRX081374	M00621
EpiUwRmapDNaseBreast.vHMEC.SRX081374	M00626
EpiUwRmapDNaseBreast.vHMEC.SRX081374	M00651
EpiUwRmapDNaseBreast.vHMEC.SRX081374	M00652
EpiUwRmapDNaseBreast.vHMEC.SRX081374	M00653
EpiUwRmapDNaseBreast.vHMEC.SRX081374	M00654
EpiUwRmapDNaseBreast.vHMEC.SRX081374	M00655
EpiUwRmapDNaseBreast.vHMEC.SRX081374	M00660
EpiUwRmapDNaseBreast.vHMEC.SRX081374	M00678
EpiUwRmapDNaseBreast.vHMEC.SRX081374	M00683
EpiUwRmapDNaseBreast.vHMEC.SRX081374	M00687
EpiUwRmapDNaseBreast.vHMEC.SRX081374	M00691
EpiUwRmapDNaseBreast.vHMEC.SRX081374	M00694
EpiUwRmapDNaseBreast.vHMEC.SRX081374	M00695
EpiUwRmapDNaseBreast.vHMEC.SRX081374	M00697
EpiUwRmapDNaseBreast.vHMEC.SRX081374	M00699
EpiUwRmapDNaseBreast.vHMEC.SRX081374	M00711
EpiUwRmapDNaseBreast.vHMEC.SRX081374	M00722
EpiUwRmapDNaseBreast.vHMEC.SRX081374	M00726
EpiUwRmapDNaseBreast.vHMEC.SRX081374	M00730
EpiUwRmapDNaseBreast.vHMEC.SRX081374	M00731
EpiUwRmapDNaseBreast.vHMEC.SRX081374	M00733
EpiUwRmapDNaseBreast.vHMEC.SRX081374	M00736
EpiUwRmapDNaseBreast.vHMEC.SRX081374	M00737
EpiUwRmapDNaseBreast.vHMEC.SRX081374	M00738
EpiUwRmapDNaseBreast.vHMEC.SRX081374	M00739
EpiUwRmapDNaseBreast.vHMEC.SRX081374	M00740
EpiUwRmapDNaseBreast.vHMEC.SRX081374	M00747
EpiUwRmapDNaseBreast.vHMEC.SRX081374	M00751
EpiUwRmapDNaseBreast.vHMEC.SRX081374	M00752
EpiUwRmapDNaseBreast.vHMEC.SRX081374	M00769
EpiUwRmapDNaseBreast.vHMEC.SRX081374	M00771
EpiUwRmapDNaseBreast.vHMEC.SRX081374	M00772
EpiUwRmapDNaseBreast.vHMEC.SRX081374	M00774
EpiUwRmapDNaseBreast.vHMEC.SRX081374	M00775
EpiUwRmapDNaseBreast.vHMEC.SRX081374	M00778
EpiUwRmapDNaseBreast.vHMEC.SRX081374	M00788
EpiUwRmapDNaseBreast.vHMEC.SRX081374	M00793
EpiUwRmapDNaseBreast.vHMEC.SRX081374	M00796
EpiUwRmapDNaseBreast.vHMEC.SRX081374	M00797
EpiUwRmapDNaseBreast.vHMEC.SRX081374	M00799
EpiUwRmapDNaseBreast.vHMEC.SRX081374	M00800
EpiUwRmapDNaseBreast.vHMEC.SRX081374	M00801
EpiUwRmapDNaseBreast.vHMEC.SRX081374	M00803
EpiUwRmapDNaseBreast.vHMEC.SRX081374	M00806
EpiUwRmapDNaseBreast.vHMEC.SRX081374	M00807
EpiUwRmapDNaseBreast.vHMEC.SRX081374	M00810
EpiUwRmapDNaseBreast.vHMEC.SRX081374	M00821
EpiUwRmapDNaseBreast.vHMEC.SRX081374	M00912
EpiUwRmapDNaseBreast.vHMEC.SRX081374	M00916
EpiUwRmapDNaseBreast.vHMEC.SRX081374	M00917
EpiUwRmapDNaseBreast.vHMEC.SRX081374	M00918
EpiUwRmapDNaseBreast.vHMEC.SRX081374	M00919
EpiUwRmapDNaseBreast.vHMEC.SRX081374	M00920
EpiUwRmapDNaseBreast.vHMEC.SRX081374	M00922
EpiUwRmapDNaseBreast.vHMEC.SRX081374	M00924
EpiUwRmapDNaseBreast.vHMEC.SRX081374	M00925
EpiUwRmapDNaseBreast.vHMEC.SRX081374	M00926
EpiUwRmapDNaseBreast.vHMEC.SRX081374	M00932
EpiUwRmapDNaseBreast.vHMEC.SRX081374	M00933
EpiUwRmapDNaseBreast.vHMEC.SRX081374	M00936
EpiUwRmapDNaseBreast.vHMEC.SRX081374	M00938
EpiUwRmapDNaseBreast.vHMEC.SRX081374	M00939
EpiUwRmapDNaseBreast.vHMEC.SRX081374	M00940
EpiUwRmapDNaseBreast.vHMEC.SRX081374	M00941
EpiUwRmapDNaseBreast.vHMEC.SRX081374	M00942
EpiUwRmapDNaseBreast.vHMEC.SRX081374	M00943
EpiUwRmapDNaseBreast.vHMEC.SRX081374	M00944
EpiUwRmapDNaseBreast.vHMEC.SRX081374	M00945
EpiUwRmapDNaseBreast.vHMEC.SRX081374	M00946
EpiUwRmapDNaseBreast.vHMEC.SRX081374	M00953
EpiUwRmapDNaseBreast.vHMEC.SRX081374	M00954
EpiUwRmapDNaseBreast.vHMEC.SRX081374	M00958
EpiUwRmapDNaseBreast.vHMEC.SRX081374	M00971
EpiUwRmapDNaseBreast.vHMEC.SRX081374	M00972
EpiUwRmapDNaseBreast.vHMEC.SRX081374	M00976
EpiUwRmapDNaseBreast.vHMEC.SRX081374	M00981
EpiUwRmapDNaseBreast.vHMEC.SRX081374	M00982
EpiUwRmapDNaseBreast.vHMEC.SRX081374	M00983
EpiUwRmapDNaseBreast.vHMEC.SRX081374	M00984
EpiUwRmapDNaseBreast.vHMEC.SRX081374	M00985
EpiUwRmapDNaseBreast.vHMEC.SRX081374	M00986
EpiUwRmapDNaseBreast.vHMEC.SRX081374	M01001
EpiUwRmapDNaseBreast.vHMEC.SRX081374	M01002
EpiUwRmapDNaseBreast.vHMEC.SRX081374	M01007
EpiUwRmapDNaseBreast.vHMEC.SRX081374	M01009
EpiUwRmapDNaseBreast.vHMEC.SRX081374	M01028
EpiUwRmapDNaseBreast.vHMEC.SRX081374	M01034
EpiUwRmapDNaseBreast.vHMEC.SRX081374	M01035
EpiUwRmapDNaseBreast.vHMEC.SRX081374	M01045
EpiUwRmapDNaseBreast.vHMEC.SRX081374	M01047
EpiUwRmapDNaseBreast.vHMEC.SRX081374	M01054
EpiUwRmapDNaseBreast.vHMEC.SRX081374	M01057
EpiUwRmapDNaseBreast.vHMEC.SRX081374	M01063
EpiUwRmapDNaseBreast.vHMEC.SRX081374	M01064
EpiUwRmapDNaseBreast.vHMEC.SRX081374	M01065
EpiUwRmapDNaseBreast.vHMEC.SRX081374	M01066
EpiUwRmapDNaseBreast.vHMEC.SRX081374	M01068
EpiUwRmapDNaseBreast.vHMEC.SRX081374	M01070
EpiUwRmapDNaseBreast.vHMEC.SRX081374	M01072
EpiUwRmapDNaseBreast.vHMEC.SRX081374	M01073
EpiUwRmapDNaseBreast.vHMEC.SRX081374	M01078
EpiUwRmapDNaseBreast.vHMEC.SRX081374	M01080
EpiUwRmapDNaseBreast.vHMEC.SRX081374	M01088
EpiUwRmapDNaseBreast.vHMEC.SRX081374	M01090
EpiUwRmapDNaseBreast.vHMEC.SRX081374	M01092
EpiUwRmapDNaseBreast.vHMEC.SRX081374	M01096
EpiUwRmapDNaseBreast.vHMEC.SRX081374	M01101
EpiUwRmapDNaseBreast.vHMEC.SRX081374	M01104
EpiUwRmapDNaseBreast.vHMEC.SRX081374	M01111
EpiUwRmapDNaseBreast.vHMEC.SRX081374	M01112
EpiUwRmapDNaseBreast.vHMEC.SRX081374	M01113
EpiUwRmapDNaseBreast.vHMEC.SRX081374	M01114
EpiUwRmapDNaseBreast.vHMEC.SRX081374	M01116
EpiUwRmapDNaseBreast.vHMEC.SRX081374	M01118
EpiUwRmapDNaseBreast.vHMEC.SRX081374	M01122
EpiUwRmapDNaseBreast.vHMEC.SRX081374	M01124
EpiUwRmapDNaseBreast.vHMEC.SRX081374	M01125
EpiUwRmapDNaseBreast.vHMEC.SRX081374	M01145
EpiUwRmapDNaseBreast.vHMEC.SRX081374	M01154
EpiUwRmapDNaseBreast.vHMEC.SRX081374	M01156
EpiUwRmapDNaseBreast.vHMEC.SRX081374	M01163
EpiUwRmapDNaseBreast.vHMEC.SRX081374	M01165
EpiUwRmapDNaseBreast.vHMEC.SRX081374	M01167
EpiUwRmapDNaseBreast.vHMEC.SRX081374	M01175
EpiUwRmapDNaseBreast.vHMEC.SRX081374	M01179
EpiUwRmapDNaseBreast.vHMEC.SRX081374	M01180
EpiUwRmapDNaseBreast.vHMEC.SRX081374	M01182
EpiUwRmapDNaseBreast.vHMEC.SRX081374	M01186
EpiUwRmapDNaseBreast.vHMEC.SRX081374	M01187
EpiUwRmapDNaseBreast.vHMEC.SRX081374	M01196
EpiUwRmapDNaseBreast.vHMEC.SRX081374	M01200
EpiUwRmapDNaseBreast.vHMEC.SRX081374	M01201
EpiUwRmapDNaseBreast.vHMEC.SRX081374	M01203
EpiUwRmapDNaseBreast.vHMEC.SRX081374	M01204
EpiUwRmapDNaseBreast.vHMEC.SRX081374	M01208
EpiUwRmapDNaseBreast.vHMEC.SRX081374	M01214
EpiUwRmapDNaseBreast.vHMEC.SRX081374	M01219
EpiUwRmapDNaseBreast.vHMEC.SRX081374	M01223
EpiUwRmapDNaseBreast.vHMEC.SRX081374	M01224
EpiUwRmapDNaseBreast.vHMEC.SRX081374	M01228
EpiUwRmapDNaseBreast.vHMEC.SRX081374	M01238
EpiUwRmapDNaseBreast.vHMEC.SRX081374	M01239
EpiUwRmapDNaseBreast.vHMEC.SRX081374	M01240
EpiUwRmapDNaseBreast.vHMEC.SRX081374	M01241
EpiUwRmapDNaseBreast.vHMEC.SRX081374	M01243
EpiUwRmapDNaseBreast.vHMEC.SRX081374	M01249
EpiUwRmapDNaseBreast.vHMEC.SRX081374	M01251
EpiUwRmapDNaseBreast.vHMEC.SRX081374	M01252
EpiUwRmapDNaseBreast.vHMEC.SRX081374	M01256
EpiUwRmapDNaseBreast.vHMEC.SRX081374	M01257
EpiUwRmapDNaseBreast.vHMEC.SRX081374	M01258
EpiUwRmapDNaseBreast.vHMEC.SRX081374	M01259
EpiUwRmapDNaseBreast.vHMEC.SRX081374	M01267
EpiUwRmapDNaseBreast.vHMEC.SRX081374	M01273
EpiUwRmapDNaseBreast.vHMEC.SRX081374	M01298
EpiUwRmapDNaseBreast.vHMEC.SRX081374	M01299
EpiUwRmapDNaseBreast.vHMEC.SRX081374	M01301
EpiUwRmapDNaseBreast.vHMEC.SRX081374	M01304
EpiUwRmapDNaseBreast.vHMEC.SRX081374	M01305
EpiUwRmapDNaseBreast.vHMEC.SRX081374	M01308
EpiUwRmapDNaseBreast.vHMEC.SRX081374	M01375
EpiUwRmapDNaseBreast.vHMEC.SRX081374	M01403
EpiUwRmapDNaseBreast.vHMEC.SRX081374	M01462
EpiUwRmapDNaseBreast.vHMEC.SRX081374	M01492
EpiUwRmapDNaseBreast.vHMEC.SRX081374	M01495
EpiUwRmapDNaseBreast.vHMEC.SRX081374	M01496
EpiUwRmapDNaseBreast.vHMEC.SRX081374	M01499
EpiUwRmapDNaseBreast.vHMEC.SRX081374	M01500
EpiUwRmapDNaseBreast.vHMEC.SRX081374	M01503
EpiUwRmapDNaseBreast.vHMEC.SRX081374	M01505
EpiUwRmapDNaseBreast.vHMEC.SRX081374	M01509
EpiUwRmapDNaseBreast.vHMEC.SRX081374	M01511
EpiUwRmapDNaseBreast.vHMEC.SRX081374	M01512
EpiUwRmapDNaseBreast.vHMEC.SRX081374	M01513
EpiUwRmapDNaseBreast.vHMEC.SRX081374	M01516
EpiUwRmapDNaseBreast.vHMEC.SRX081374	M01517
EpiUwRmapDNaseBreast.vHMEC.SRX081374	M01518
EpiUwRmapDNaseBreast.vHMEC.SRX081374	M01519
EpiUwRmapDNaseBreast.vHMEC.SRX081374	M01520
EpiUwRmapDNaseBreast.vHMEC.SRX081374	M01521
EpiUwRmapDNaseBreast.vHMEC.SRX081374	M01525
EpiUwRmapDNaseBreast.vHMEC.SRX081374	M01527
EpiUwRmapDNaseBreast.vHMEC.SRX081374	M01529
EpiUwRmapDNaseBreast.vHMEC.SRX081374	M01530
EpiUwRmapDNaseBreast.vHMEC.SRX081374	M01532
EpiUwRmapDNaseBreast.vHMEC.SRX081374	M01538
EpiUwRmapDNaseBreast.vHMEC.SRX081374	M01541
EpiUwRmapDNaseBreast.vHMEC.SRX081374	M01542
EpiUwRmapDNaseBreast.vHMEC.SRX081374	M01544
EpiUwRmapDNaseBreast.vHMEC.SRX081374	M01546
EpiUwRmapDNaseBreast.vHMEC.SRX081374	M01550
EpiUwRmapDNaseBreast.vHMEC.SRX081374	M01551
EpiUwRmapDNaseBreast.vHMEC.SRX081374	M01555
EpiUwRmapDNaseBreast.vHMEC.SRX081374	M01557
EpiUwRmapDNaseBreast.vHMEC.SRX081374	M01558
EpiUwRmapDNaseBreast.vHMEC.SRX081374	M01559
EpiUwRmapDNaseBreast.vHMEC.SRX081374	M01560
EpiUwRmapDNaseBreast.vHMEC.SRX081374	M01563
EpiUwRmapDNaseBreast.vHMEC.SRX081374	M01564
EpiUwRmapDNaseBreast.vHMEC.SRX081374	M01571
EpiUwRmapDNaseBreast.vHMEC.SRX081374	M01576
EpiUwRmapDNaseBreast.vHMEC.SRX081374	M01577
EpiUwRmapDNaseBreast.vHMEC.SRX081374	M01584
EpiUwRmapDNaseBreast.vHMEC.SRX081374	M01585
EpiUwRmapDNaseBreast.vHMEC.SRX081374	M01586
EpiUwRmapDNaseBreast.vHMEC.SRX081374	M01587
EpiUwRmapDNaseBreast.vHMEC.SRX081374	M01588
EpiUwRmapDNaseBreast.vHMEC.SRX081374	M01592
EpiUwRmapDNaseBreast.vHMEC.SRX081374	M01593
EpiUwRmapDNaseBreast.vHMEC.SRX081374	M01597
EpiUwRmapDNaseBreast.vHMEC.SRX081374	M01598
EpiUwRmapDNaseBreast.vHMEC.SRX081374	M01600
EpiUwRmapDNaseBreast.vHMEC.SRX081374	M01608
EpiUwRmapDNaseBreast.vHMEC.SRX081374	M01609
EpiUwRmapDNaseBreast.vHMEC.SRX081374	M01610
EpiUwRmapDNaseBreast.vHMEC.SRX081374	M01613
EpiUwRmapDNaseBreast.vHMEC.SRX081374	M01615
EpiUwRmapDNaseBreast.vHMEC.SRX081374	M01617
EpiUwRmapDNaseBreast.vHMEC.SRX081374	M01620
EpiUwRmapDNaseBreast.vHMEC.SRX081374	M01622
EpiUwRmapDNaseBreast.vHMEC.SRX081374	M01628
EpiUwRmapDNaseBreast.vHMEC.SRX081374	M01629
EpiUwRmapDNaseBreast.vHMEC.SRX081374	M01632
EpiUwRmapDNaseBreast.vHMEC.SRX081374	M01633
EpiUwRmapDNaseBreast.vHMEC.SRX081374	M01634
EpiUwRmapDNaseBreast.vHMEC.SRX081374	M01635
EpiUwRmapDNaseBreast.vHMEC.SRX081374	M01636
EpiUwRmapDNaseBreast.vHMEC.SRX081374	M01639
EpiUwRmapDNaseBreast.vHMEC.SRX081374	M01640
EpiUwRmapDNaseBreast.vHMEC.SRX081374	M01642
EpiUwRmapDNaseBreast.vHMEC.SRX081374	M01643
EpiUwRmapDNaseBreast.vHMEC.SRX081374	M01644
EpiUwRmapDNaseBreast.vHMEC.SRX081374	M01648
EpiUwRmapDNaseBreast.vHMEC.SRX081374	M01649
EpiUwRmapDNaseBreast.vHMEC.SRX081374	M01651
EpiUwRmapDNaseBreast.vHMEC.SRX081374	M01652
EpiUwRmapDNaseBreast.vHMEC.SRX081374	M01655
EpiUwRmapDNaseBreast.vHMEC.SRX081374	M01656
EpiUwRmapDNaseBreast.vHMEC.SRX081374	M01658
EpiUwRmapDNaseBreast.vHMEC.SRX081374	M01660
EpiUwRmapDNaseBreast.vHMEC.SRX081374	M01663
EpiUwRmapDNaseBreast.vHMEC.SRX081374	M01673
EpiUwRmapDNaseBreast.vHMEC.SRX081374	M01677
EpiUwRmapDNaseBreast.vHMEC.SRX081374	M01681
EpiUwRmapDNaseBreast.vHMEC.SRX081374	M01683
EpiUwRmapDNaseBreast.vHMEC.SRX081374	M01684
EpiUwRmapDNaseBreast.vHMEC.SRX081374	M01685
EpiUwRmapDNaseBreast.vHMEC.SRX081374	M01688
EpiUwRmapDNaseBreast.vHMEC.SRX081374	M01690
EpiUwRmapDNaseBreast.vHMEC.SRX081374	M01699
EpiUwRmapDNaseBreast.vHMEC.SRX081374	M01700
EpiUwRmapDNaseBreast.vHMEC.SRX081374	M01701
EpiUwRmapDNaseBreast.vHMEC.SRX081374	M01713
EpiUwRmapDNaseBreast.vHMEC.SRX081374	M01736
EpiUwRmapDNaseBreast.vHMEC.SRX081374	M01742
EpiUwRmapDNaseBreast.vHMEC.SRX081374	M01744
EpiUwRmapDNaseBreast.vHMEC.SRX081374	M01748
EpiUwRmapDNaseBreast.vHMEC.SRX081374	M01752
EpiUwRmapDNaseBreast.vHMEC.SRX081374	M01759
EpiUwRmapDNaseBreast.vHMEC.SRX081374	M01768
EpiUwRmapDNaseBreast.vHMEC.SRX081374	M01770
EpiUwRmapDNaseBreast.vHMEC.SRX081374	M01772
EpiUwRmapDNaseBreast.vHMEC.SRX081374	M01779
EpiUwRmapDNaseBreast.vHMEC.SRX081374	M01783
EpiUwRmapDNaseBreast.vHMEC.SRX081374	M01793
EpiUwRmapDNaseBreast.vHMEC.SRX081374	M01794
EpiUwRmapDNaseBreast.vHMEC.SRX081374	M01795
EpiUwRmapDNaseBreast.vHMEC.SRX081374	M01806
EpiUwRmapDNaseBreast.vHMEC.SRX081374	M01809
EpiUwRmapDNaseBreast.vHMEC.SRX081374	M01812
EpiUwRmapDNaseBreast.vHMEC.SRX081374	M01815
EpiUwRmapDNaseBreast.vHMEC.SRX081374	M01816
EpiUwRmapDNaseBreast.vHMEC.SRX081374	M01817
EpiUwRmapDNaseBreast.vHMEC.SRX081374	M01818
EpiUwRmapDNaseBreast.vHMEC.SRX081374	M01820
EpiUwRmapDNaseBreast.vHMEC.SRX081374	M01830
EpiUwRmapDNaseBreast.vHMEC.SRX081374	M01833
EpiUwRmapDNaseBreast.vHMEC.SRX081374	M01837
EpiUwRmapDNaseBreast.vHMEC.SRX081374	M01838
EpiUwRmapDNaseBreast.vHMEC.SRX081374	M01839
EpiUwRmapDNaseBreast.vHMEC.SRX081374	M01840
EpiUwRmapDNaseBreast.vHMEC.SRX081374	M01843
EpiUwRmapDNaseBreast.vHMEC.SRX081374	M01849
EpiUwRmapDNaseBreast.vHMEC.SRX081374	M01852
EpiUwRmapDNaseBreast.vHMEC.SRX081374	M01858
EpiUwRmapDNaseBreast.vHMEC.SRX081374	M01861
EpiUwRmapDNaseBreast.vHMEC.SRX081374	M01862
EpiUwRmapDNaseBreast.vHMEC.SRX081374	M01863
EpiUwRmapDNaseBreast.vHMEC.SRX081374	M01864
EpiUwRmapDNaseBreast.vHMEC.SRX081374	M01866
EpiUwRmapDNaseBreast.vHMEC.SRX081374	M01869
EpiUwRmapDNaseBreast.vHMEC.SRX081374	M01874
EpiUwRmapDNaseBreast.vHMEC.SRX081374	M01876
EpiUwRmapDNaseBreast.vHMEC.SRX081374	M01881
EpiUwRmapDNaseBreast.vHMEC.SRX081374	M01891
EpiUwRmapDNaseBreast.vHMEC.SRX081374	M01896
EpiUwRmapDNaseBreast.vHMEC.SRX081374	M01898
EpiUwRmapDNaseBreast.vHMEC.SRX081374	M01899
EpiUwRmapDNaseBreast.vHMEC.SRX081374	M01903
EpiUwRmapDNaseBreast.vHMEC.SRX081374	M01908
EpiUwRmapDNaseBreast.vHMEC.SRX081374	M01909
EpiUwRmapDNaseBreast.vHMEC.SRX081374	M01911
EpiUwRmapDNaseBreast.vHMEC.SRX081374	M01914
EpiUwRmapDNaseBreast.vHMEC.SRX081374	M01916
EpiUwRmapDNaseBreast.vHMEC.SRX081374	M01917
EpiUwRmapDNaseBreast.vHMEC.SRX081374	M01920
EpiUwRmapDNaseBreast.vHMEC.SRX081374	M01924
EpiUwRmapDNaseBreast.vHMEC.SRX081374	M01925
EpiUwRmapDNaseBreast.vHMEC.SRX081374	M01927
EpiUwRmapDNaseBreast.vHMEC.SRX081374	M01928
EpiUwRmapDNaseBreast.vHMEC.SRX081374	M01932
EpiUwRmapDNaseBreast.vHMEC.SRX081374	M01933
EpiUwRmapDNaseBreast.vHMEC.SRX081374	M01934
EpiUwRmapDNaseBreast.vHMEC.SRX081374	M01935
EpiUwRmapDNaseBreast.vHMEC.SRX081374	M01936
EpiUwRmapDNaseBreast.vHMEC.SRX081374	M01938
EpiUwRmapDNaseBreast.vHMEC.SRX081374	M01940
EpiUwRmapDNaseBreast.vHMEC.SRX081374	M01944
EpiUwRmapDNaseBreast.vHMEC.SRX081374	M01946
EpiUwRmapDNaseBreast.vHMEC.SRX081374	M01947
EpiUwRmapDNaseBreast.vHMEC.SRX081374	M01948
EpiUwRmapDNaseBreast.vHMEC.SRX081374	M01949
EpiUwRmapDNaseBreast.vHMEC.SRX081374	M01950
EpiUwRmapDNaseBreast.vHMEC.SRX081374	M01951
EpiUwRmapDNaseBreast.vHMEC.SRX081374	M01953
EpiUwRmapDNaseBreast.vHMEC.SRX081374	M01954
EpiUwRmapDNaseBreast.vHMEC.SRX081374	M01957
EpiUwRmapDNaseBreast.vHMEC.SRX081374	M01958
EpiUwRmapDNaseBreast.vHMEC.SRX081374	M01959
EpiUwRmapDNaseBreast.vHMEC.SRX081374	M01960
EpiUwRmapDNaseBreast.vHMEC.SRX081374	M01961
EpiUwRmapDNaseBreast.vHMEC.SRX081374	M01962
EpiUwRmapDNaseBreast.vHMEC.SRX081374	M01963
EpiUwRmapDNaseBreast.vHMEC.SRX081374	M01965
EpiUwRmapDNaseBreast.vHMEC.SRX081374	M01966
EpiUwRmapDNaseBreast.vHMEC.SRX081374	M01967
EpiUwRmapDNaseBreast.vHMEC.SRX081374	M01969
EpiUwRmapDNaseBreast.vHMEC.SRX081374	M01970
EpiUwRmapDNaseBreast.vHMEC.SRX081374	M01972
EpiUwRmapDNaseBreast.vHMEC.SRX081374	M01974
EpiUwRmapDNaseBreast.vHMEC.SRX081374	M01975
EpiUwRmapDNaseBreast.vHMEC.SRX081374	M01976
EpiUwRmapDNaseBreast.vHMEC.SRX081374	M01977
EpiUwRmapDNaseBreast.vHMEC.SRX081374	M01979
EpiUwRmapDNaseBreast.vHMEC.SRX081374	M01980
EpiUwRmapDNaseBreast.vHMEC.SRX081374	M01981
EpiUwRmapDNaseBreast.vHMEC.SRX081374	M01982
EpiUwRmapDNaseBreast.vHMEC.SRX081374	M01983
EpiUwRmapDNaseBreast.vHMEC.SRX081374	M01984
EpiUwRmapDNaseBreast.vHMEC.SRX081374	M01985
EpiUwRmapDNaseBreast.vHMEC.SRX081374	M01986
EpiUwRmapDNaseBreast.vHMEC.SRX081374	M01987
EpiUwRmapDNaseBreast.vHMEC.SRX081374	M01988
EpiUwRmapDNaseBreast.vHMEC.SRX081374	M01989
EpiUwRmapDNaseBreast.vHMEC.SRX081374	M01990
EpiUwRmapDNaseBreast.vHMEC.SRX081374	M01991
EpiUwRmapDNaseBreast.vHMEC.SRX081374	M01992
EpiUwRmapDNaseBreast.vHMEC.SRX081374	M02011
EpiUwRmapDNaseBreast.vHMEC.SRX081374	M02012
EpiUwRmapDNaseBreast.vHMEC.SRX081374	M02032
EpiUwRmapDNaseBreast.vHMEC.SRX081374	M02036
EpiUwRmapDNaseBreast.vHMEC.SRX081374	M02037
EpiUwRmapDNaseBreast.vHMEC.SRX081374	M02038
EpiUwRmapDNaseBreast.vHMEC.SRX081374	M02039
EpiUwRmapDNaseBreast.vHMEC.SRX081374	M02040
EpiUwRmapDNaseBreast.vHMEC.SRX081374	M02041
EpiUwRmapDNaseBreast.vHMEC.SRX081374	M02042
EpiUwRmapDNaseBreast.vHMEC.SRX081374	M02043
EpiUwRmapDNaseBreast.vHMEC.SRX081374	MA0002.2
EpiUwRmapDNaseBreast.vHMEC.SRX081374	MA0003.1
EpiUwRmapDNaseBreast.vHMEC.SRX081374	MA0004.1
EpiUwRmapDNaseBreast.vHMEC.SRX081374	MA0006.1
EpiUwRmapDNaseBreast.vHMEC.SRX081374	MA0007.1
EpiUwRmapDNaseBreast.vHMEC.SRX081374	MA0018.2
EpiUwRmapDNaseBreast.vHMEC.SRX081374	MA0024.1
EpiUwRmapDNaseBreast.vHMEC.SRX081374	MA0028.1
EpiUwRmapDNaseBreast.vHMEC.SRX081374	MA0039.2
EpiUwRmapDNaseBreast.vHMEC.SRX081374	MA0043.1
EpiUwRmapDNaseBreast.vHMEC.SRX081374	MA0047.2
EpiUwRmapDNaseBreast.vHMEC.SRX081374	MA0050.1
EpiUwRmapDNaseBreast.vHMEC.SRX081374	MA0051.1
EpiUwRmapDNaseBreast.vHMEC.SRX081374	MA0052.1
EpiUwRmapDNaseBreast.vHMEC.SRX081374	MA0058.1
EpiUwRmapDNaseBreast.vHMEC.SRX081374	MA0059.1
EpiUwRmapDNaseBreast.vHMEC.SRX081374	MA0060.1
EpiUwRmapDNaseBreast.vHMEC.SRX081374	MA0061.1
EpiUwRmapDNaseBreast.vHMEC.SRX081374	MA0062.2
EpiUwRmapDNaseBreast.vHMEC.SRX081374	MA0067.1
EpiUwRmapDNaseBreast.vHMEC.SRX081374	MA0076.1
EpiUwRmapDNaseBreast.vHMEC.SRX081374	MA0079.2
EpiUwRmapDNaseBreast.vHMEC.SRX081374	MA0080.2
EpiUwRmapDNaseBreast.vHMEC.SRX081374	MA0087.1
EpiUwRmapDNaseBreast.vHMEC.SRX081374	MA0088.1
EpiUwRmapDNaseBreast.vHMEC.SRX081374	MA0089.1
EpiUwRmapDNaseBreast.vHMEC.SRX081374	MA0090.1
EpiUwRmapDNaseBreast.vHMEC.SRX081374	MA0093.1
EpiUwRmapDNaseBreast.vHMEC.SRX081374	MA0098.1
EpiUwRmapDNaseBreast.vHMEC.SRX081374	MA0099.2
EpiUwRmapDNaseBreast.vHMEC.SRX081374	MA0100.1
EpiUwRmapDNaseBreast.vHMEC.SRX081374	MA0101.1
EpiUwRmapDNaseBreast.vHMEC.SRX081374	MA0102.2
EpiUwRmapDNaseBreast.vHMEC.SRX081374	MA0104.2
EpiUwRmapDNaseBreast.vHMEC.SRX081374	MA0105.1
EpiUwRmapDNaseBreast.vHMEC.SRX081374	MA0106.1
EpiUwRmapDNaseBreast.vHMEC.SRX081374	MA0107.1
EpiUwRmapDNaseBreast.vHMEC.SRX081374	MA0117.1
EpiUwRmapDNaseBreast.vHMEC.SRX081374	MA0119.1
EpiUwRmapDNaseBreast.vHMEC.SRX081374	MA0131.1
EpiUwRmapDNaseBreast.vHMEC.SRX081374	MA0138.2
EpiUwRmapDNaseBreast.vHMEC.SRX081374	MA0139.1
EpiUwRmapDNaseBreast.vHMEC.SRX081374	MA0146.1
EpiUwRmapDNaseBreast.vHMEC.SRX081374	MA0147.1
EpiUwRmapDNaseBreast.vHMEC.SRX081374	MA0148.1
EpiUwRmapDNaseBreast.vHMEC.SRX081374	MA0150.1
EpiUwRmapDNaseBreast.vHMEC.SRX081374	MA0156.1
EpiUwRmapDNaseBreast.vHMEC.SRX081374	MA0162.1
EpiUwRmapDNaseBreast.vHMEC.SRX081374	MA0259.1
EpiUwRmapDNaseBreast.vHMEC.SRX081374	PBM0007
EpiUwRmapDNaseBreast.vHMEC.SRX081374	PBM0009
EpiUwRmapDNaseBreast.vHMEC.SRX081374	PBM0010
EpiUwRmapDNaseBreast.vHMEC.SRX081374	PBM0012
EpiUwRmapDNaseBreast.vHMEC.SRX081374	PBM0013
EpiUwRmapDNaseBreast.vHMEC.SRX081374	PBM0017
EpiUwRmapDNaseBreast.vHMEC.SRX081374	PBM0018
EpiUwRmapDNaseBreast.vHMEC.SRX081374	PBM0020
EpiUwRmapDNaseBreast.vHMEC.SRX081374	PBM0022
EpiUwRmapDNaseBreast.vHMEC.SRX081374	PBM0023
EpiUwRmapDNaseBreast.vHMEC.SRX081374	PBM0027
EpiUwRmapDNaseBreast.vHMEC.SRX081374	PBM0034
EpiUwRmapDNaseBreast.vHMEC.SRX081374	PBM0035
EpiUwRmapDNaseBreast.vHMEC.SRX081374	PBM0041
EpiUwRmapDNaseBreast.vHMEC.SRX081374	PBM0049
EpiUwRmapDNaseBreast.vHMEC.SRX081374	PBM0050
EpiUwRmapDNaseBreast.vHMEC.SRX081374	PBM0052
EpiUwRmapDNaseBreast.vHMEC.SRX081374	PBM0053
EpiUwRmapDNaseBreast.vHMEC.SRX081374	PBM0054
EpiUwRmapDNaseBreast.vHMEC.SRX081374	PBM0055
EpiUwRmapDNaseBreast.vHMEC.SRX081374	PBM0057
EpiUwRmapDNaseBreast.vHMEC.SRX081374	PBM0060
EpiUwRmapDNaseBreast.vHMEC.SRX081374	PBM0063
EpiUwRmapDNaseBreast.vHMEC.SRX081374	PBM0065
EpiUwRmapDNaseBreast.vHMEC.SRX081374	PBM0068
EpiUwRmapDNaseBreast.vHMEC.SRX081374	PBM0072
EpiUwRmapDNaseBreast.vHMEC.SRX081374	PBM0074
EpiUwRmapDNaseBreast.vHMEC.SRX081374	PBM0079
EpiUwRmapDNaseBreast.vHMEC.SRX081374	PBM0080
EpiUwRmapDNaseBreast.vHMEC.SRX081374	PBM0081
EpiUwRmapDNaseBreast.vHMEC.SRX081374	PBM0082
EpiUwRmapDNaseBreast.vHMEC.SRX081374	PBM0083
EpiUwRmapDNaseBreast.vHMEC.SRX081374	PBM0084
EpiUwRmapDNaseBreast.vHMEC.SRX081374	PBM0085
EpiUwRmapDNaseBreast.vHMEC.SRX081374	PBM0086
EpiUwRmapDNaseBreast.vHMEC.SRX081374	PBM0087
EpiUwRmapDNaseBreast.vHMEC.SRX081374	PBM0089
EpiUwRmapDNaseBreast.vHMEC.SRX081374	PBM0090
EpiUwRmapDNaseBreast.vHMEC.SRX081374	PBM0091
EpiUwRmapDNaseBreast.vHMEC.SRX081374	PBM0093
EpiUwRmapDNaseBreast.vHMEC.SRX081374	PBM0094
EpiUwRmapDNaseBreast.vHMEC.SRX081374	PBM0095
EpiUwRmapDNaseBreast.vHMEC.SRX081374	PBM0096
EpiUwRmapDNaseBreast.vHMEC.SRX081374	PBM0097
EpiUwRmapDNaseBreast.vHMEC.SRX081374	PBM0098
EpiUwRmapDNaseBreast.vHMEC.SRX081374	PBM0100
EpiUwRmapDNaseBreast.vHMEC.SRX081374	PBM0101
EpiUwRmapDNaseBreast.vHMEC.SRX081374	PBM0102
EpiUwRmapDNaseBreast.vHMEC.SRX081374	PBM0103
EpiUwRmapDNaseBreast.vHMEC.SRX081374	PBM0104
EpiUwRmapDNaseBreast.vHMEC.SRX081374	PBM0105
EpiUwRmapDNaseBreast.vHMEC.SRX081374	PBM0106
EpiUwRmapDNaseBreast.vHMEC.SRX081374	PBM0107
EpiUwRmapDNaseBreast.vHMEC.SRX081374	PBM0108
EpiUwRmapDNaseBreast.vHMEC.SRX081374	PBM0109
EpiUwRmapDNaseBreast.vHMEC.SRX081374	PBM0110
EpiUwRmapDNaseBreast.vHMEC.SRX081374	PBM0112
EpiUwRmapDNaseBreast.vHMEC.SRX081374	PBM0113
EpiUwRmapDNaseBreast.vHMEC.SRX081374	PBM0114
EpiUwRmapDNaseBreast.vHMEC.SRX081374	PBM0115
EpiUwRmapDNaseBreast.vHMEC.SRX081374	PBM0116
EpiUwRmapDNaseBreast.vHMEC.SRX081374	PBM0117
EpiUwRmapDNaseBreast.vHMEC.SRX081374	PBM0118
EpiUwRmapDNaseBreast.vHMEC.SRX081374	PBM0119
EpiUwRmapDNaseBreast.vHMEC.SRX081374	PBM0120
EpiUwRmapDNaseBreast.vHMEC.SRX081374	PBM0121
EpiUwRmapDNaseBreast.vHMEC.SRX081374	PBM0122
EpiUwRmapDNaseBreast.vHMEC.SRX081374	PBM0123
EpiUwRmapDNaseBreast.vHMEC.SRX081374	PBM0124
EpiUwRmapDNaseBreast.vHMEC.SRX081374	PBM0125
EpiUwRmapDNaseBreast.vHMEC.SRX081374	PBM0126
EpiUwRmapDNaseBreast.vHMEC.SRX081374	PBM0127
EpiUwRmapDNaseBreast.vHMEC.SRX081374	PBM0128
EpiUwRmapDNaseBreast.vHMEC.SRX081374	PBM0129
EpiUwRmapDNaseBreast.vHMEC.SRX081374	PBM0130
EpiUwRmapDNaseBreast.vHMEC.SRX081374	PBM0131
EpiUwRmapDNaseBreast.vHMEC.SRX081374	PBM0132
EpiUwRmapDNaseBreast.vHMEC.SRX081374	PBM0133
EpiUwRmapDNaseBreast.vHMEC.SRX081374	PBM0134
EpiUwRmapDNaseBreast.vHMEC.SRX081374	PBM0135
EpiUwRmapDNaseBreast.vHMEC.SRX081374	PBM0141
EpiUwRmapDNaseBreast.vHMEC.SRX081374	PBM0171
EpiUwRmapDNaseBreast.vHMEC.SRX081374	PBM0172
EpiUwRmapDNaseBreast.vHMEC.SRX081374	PBM0175
EpiUwRmapDNaseBreast.vHMEC.SRX081374	PBM0188
EpiUwRmapDNaseBreast.vHMEC.SRX081374	PBM0190
EpiUwRmapDNaseBreast.vHMEC.SRX081374	PBM0195
EpiUwRmapDNaseBreast.vHMEC.SRX081374	PBM0200
EpiUwRmapDNaseBreast.vHMEC.SRX081374	PBM0203
EpiUwRmapDNaseBreast.vHMEC.SRX201197	M00007
EpiUwRmapDNaseBreast.vHMEC.SRX201197	M00008
EpiUwRmapDNaseBreast.vHMEC.SRX201197	M00013
EpiUwRmapDNaseBreast.vHMEC.SRX201197	M00016
EpiUwRmapDNaseBreast.vHMEC.SRX201197	M00017
EpiUwRmapDNaseBreast.vHMEC.SRX201197	M00025
EpiUwRmapDNaseBreast.vHMEC.SRX201197	M00032
EpiUwRmapDNaseBreast.vHMEC.SRX201197	M00034
EpiUwRmapDNaseBreast.vHMEC.SRX201197	M00035
EpiUwRmapDNaseBreast.vHMEC.SRX201197	M00036
EpiUwRmapDNaseBreast.vHMEC.SRX201197	M00037
EpiUwRmapDNaseBreast.vHMEC.SRX201197	M00038
EpiUwRmapDNaseBreast.vHMEC.SRX201197	M00039
EpiUwRmapDNaseBreast.vHMEC.SRX201197	M00040
EpiUwRmapDNaseBreast.vHMEC.SRX201197	M00041
EpiUwRmapDNaseBreast.vHMEC.SRX201197	M00043
EpiUwRmapDNaseBreast.vHMEC.SRX201197	M00045
EpiUwRmapDNaseBreast.vHMEC.SRX201197	M00049
EpiUwRmapDNaseBreast.vHMEC.SRX201197	M00050
EpiUwRmapDNaseBreast.vHMEC.SRX201197	M00051
EpiUwRmapDNaseBreast.vHMEC.SRX201197	M00052
EpiUwRmapDNaseBreast.vHMEC.SRX201197	M00053
EpiUwRmapDNaseBreast.vHMEC.SRX201197	M00054
EpiUwRmapDNaseBreast.vHMEC.SRX201197	M00055
EpiUwRmapDNaseBreast.vHMEC.SRX201197	M00056
EpiUwRmapDNaseBreast.vHMEC.SRX201197	M00062
EpiUwRmapDNaseBreast.vHMEC.SRX201197	M00063
EpiUwRmapDNaseBreast.vHMEC.SRX201197	M00064
EpiUwRmapDNaseBreast.vHMEC.SRX201197	M00067
EpiUwRmapDNaseBreast.vHMEC.SRX201197	M00069
EpiUwRmapDNaseBreast.vHMEC.SRX201197	M00074
EpiUwRmapDNaseBreast.vHMEC.SRX201197	M00098
EpiUwRmapDNaseBreast.vHMEC.SRX201197	M00108
EpiUwRmapDNaseBreast.vHMEC.SRX201197	M00109
EpiUwRmapDNaseBreast.vHMEC.SRX201197	M00113
EpiUwRmapDNaseBreast.vHMEC.SRX201197	M00114
EpiUwRmapDNaseBreast.vHMEC.SRX201197	M00115
EpiUwRmapDNaseBreast.vHMEC.SRX201197	M00116
EpiUwRmapDNaseBreast.vHMEC.SRX201197	M00117
EpiUwRmapDNaseBreast.vHMEC.SRX201197	M00118
EpiUwRmapDNaseBreast.vHMEC.SRX201197	M00119
EpiUwRmapDNaseBreast.vHMEC.SRX201197	M00121
EpiUwRmapDNaseBreast.vHMEC.SRX201197	M00123
EpiUwRmapDNaseBreast.vHMEC.SRX201197	M00139
EpiUwRmapDNaseBreast.vHMEC.SRX201197	M00152
EpiUwRmapDNaseBreast.vHMEC.SRX201197	M00172
EpiUwRmapDNaseBreast.vHMEC.SRX201197	M00173
EpiUwRmapDNaseBreast.vHMEC.SRX201197	M00174
EpiUwRmapDNaseBreast.vHMEC.SRX201197	M00177
EpiUwRmapDNaseBreast.vHMEC.SRX201197	M00178
EpiUwRmapDNaseBreast.vHMEC.SRX201197	M00179
EpiUwRmapDNaseBreast.vHMEC.SRX201197	M00182
EpiUwRmapDNaseBreast.vHMEC.SRX201197	M00186
EpiUwRmapDNaseBreast.vHMEC.SRX201197	M00187
EpiUwRmapDNaseBreast.vHMEC.SRX201197	M00188
EpiUwRmapDNaseBreast.vHMEC.SRX201197	M00190
EpiUwRmapDNaseBreast.vHMEC.SRX201197	M00193
EpiUwRmapDNaseBreast.vHMEC.SRX201197	M00194
EpiUwRmapDNaseBreast.vHMEC.SRX201197	M00199
EpiUwRmapDNaseBreast.vHMEC.SRX201197	M00204
EpiUwRmapDNaseBreast.vHMEC.SRX201197	M00208
EpiUwRmapDNaseBreast.vHMEC.SRX201197	M00209
EpiUwRmapDNaseBreast.vHMEC.SRX201197	M00215
EpiUwRmapDNaseBreast.vHMEC.SRX201197	M00217
EpiUwRmapDNaseBreast.vHMEC.SRX201197	M00220
EpiUwRmapDNaseBreast.vHMEC.SRX201197	M00224
EpiUwRmapDNaseBreast.vHMEC.SRX201197	M00225
EpiUwRmapDNaseBreast.vHMEC.SRX201197	M00227
EpiUwRmapDNaseBreast.vHMEC.SRX201197	M00228
EpiUwRmapDNaseBreast.vHMEC.SRX201197	M00231
EpiUwRmapDNaseBreast.vHMEC.SRX201197	M00236
EpiUwRmapDNaseBreast.vHMEC.SRX201197	M00239
EpiUwRmapDNaseBreast.vHMEC.SRX201197	M00243
EpiUwRmapDNaseBreast.vHMEC.SRX201197	M00244
EpiUwRmapDNaseBreast.vHMEC.SRX201197	M00245
EpiUwRmapDNaseBreast.vHMEC.SRX201197	M00246
EpiUwRmapDNaseBreast.vHMEC.SRX201197	M00251
EpiUwRmapDNaseBreast.vHMEC.SRX201197	M00254
EpiUwRmapDNaseBreast.vHMEC.SRX201197	M00255
EpiUwRmapDNaseBreast.vHMEC.SRX201197	M00256
EpiUwRmapDNaseBreast.vHMEC.SRX201197	M00260
EpiUwRmapDNaseBreast.vHMEC.SRX201197	M00262
EpiUwRmapDNaseBreast.vHMEC.SRX201197	M00264
EpiUwRmapDNaseBreast.vHMEC.SRX201197	M00271
EpiUwRmapDNaseBreast.vHMEC.SRX201197	M00272
EpiUwRmapDNaseBreast.vHMEC.SRX201197	M00279
EpiUwRmapDNaseBreast.vHMEC.SRX201197	M00280
EpiUwRmapDNaseBreast.vHMEC.SRX201197	M00281
EpiUwRmapDNaseBreast.vHMEC.SRX201197	M00284
EpiUwRmapDNaseBreast.vHMEC.SRX201197	M00287
EpiUwRmapDNaseBreast.vHMEC.SRX201197	M00288
EpiUwRmapDNaseBreast.vHMEC.SRX201197	M00292
EpiUwRmapDNaseBreast.vHMEC.SRX201197	M00303
EpiUwRmapDNaseBreast.vHMEC.SRX201197	M00306
EpiUwRmapDNaseBreast.vHMEC.SRX201197	M00307
EpiUwRmapDNaseBreast.vHMEC.SRX201197	M00322
EpiUwRmapDNaseBreast.vHMEC.SRX201197	M00325
EpiUwRmapDNaseBreast.vHMEC.SRX201197	M00327
EpiUwRmapDNaseBreast.vHMEC.SRX201197	M00332
EpiUwRmapDNaseBreast.vHMEC.SRX201197	M00333
EpiUwRmapDNaseBreast.vHMEC.SRX201197	M00338
EpiUwRmapDNaseBreast.vHMEC.SRX201197	M00339
EpiUwRmapDNaseBreast.vHMEC.SRX201197	M00341
EpiUwRmapDNaseBreast.vHMEC.SRX201197	M00342
EpiUwRmapDNaseBreast.vHMEC.SRX201197	M00356
EpiUwRmapDNaseBreast.vHMEC.SRX201197	M00357
EpiUwRmapDNaseBreast.vHMEC.SRX201197	M00358
EpiUwRmapDNaseBreast.vHMEC.SRX201197	M00362
EpiUwRmapDNaseBreast.vHMEC.SRX201197	M00366
EpiUwRmapDNaseBreast.vHMEC.SRX201197	M00367
EpiUwRmapDNaseBreast.vHMEC.SRX201197	M00369
EpiUwRmapDNaseBreast.vHMEC.SRX201197	M00370
EpiUwRmapDNaseBreast.vHMEC.SRX201197	M00371
EpiUwRmapDNaseBreast.vHMEC.SRX201197	M00375
EpiUwRmapDNaseBreast.vHMEC.SRX201197	M00376
EpiUwRmapDNaseBreast.vHMEC.SRX201197	M00391
EpiUwRmapDNaseBreast.vHMEC.SRX201197	M00398
EpiUwRmapDNaseBreast.vHMEC.SRX201197	M00400
EpiUwRmapDNaseBreast.vHMEC.SRX201197	M00425
EpiUwRmapDNaseBreast.vHMEC.SRX201197	M00426
EpiUwRmapDNaseBreast.vHMEC.SRX201197	M00427
EpiUwRmapDNaseBreast.vHMEC.SRX201197	M00428
EpiUwRmapDNaseBreast.vHMEC.SRX201197	M00430
EpiUwRmapDNaseBreast.vHMEC.SRX201197	M00431
EpiUwRmapDNaseBreast.vHMEC.SRX201197	M00434
EpiUwRmapDNaseBreast.vHMEC.SRX201197	M00435
EpiUwRmapDNaseBreast.vHMEC.SRX201197	M00440
EpiUwRmapDNaseBreast.vHMEC.SRX201197	M00441
EpiUwRmapDNaseBreast.vHMEC.SRX201197	M00442
EpiUwRmapDNaseBreast.vHMEC.SRX201197	M00451
EpiUwRmapDNaseBreast.vHMEC.SRX201197	M00466
EpiUwRmapDNaseBreast.vHMEC.SRX201197	M00481
EpiUwRmapDNaseBreast.vHMEC.SRX201197	M00482
EpiUwRmapDNaseBreast.vHMEC.SRX201197	M00483
EpiUwRmapDNaseBreast.vHMEC.SRX201197	M00490
EpiUwRmapDNaseBreast.vHMEC.SRX201197	M00491
EpiUwRmapDNaseBreast.vHMEC.SRX201197	M00495
EpiUwRmapDNaseBreast.vHMEC.SRX201197	M00507
EpiUwRmapDNaseBreast.vHMEC.SRX201197	M00513
EpiUwRmapDNaseBreast.vHMEC.SRX201197	M00514
EpiUwRmapDNaseBreast.vHMEC.SRX201197	M00516
EpiUwRmapDNaseBreast.vHMEC.SRX201197	M00517
EpiUwRmapDNaseBreast.vHMEC.SRX201197	M00531
EpiUwRmapDNaseBreast.vHMEC.SRX201197	M00538
EpiUwRmapDNaseBreast.vHMEC.SRX201197	M00539
EpiUwRmapDNaseBreast.vHMEC.SRX201197	M00615
EpiUwRmapDNaseBreast.vHMEC.SRX201197	M00621
EpiUwRmapDNaseBreast.vHMEC.SRX201197	M00626
EpiUwRmapDNaseBreast.vHMEC.SRX201197	M00651
EpiUwRmapDNaseBreast.vHMEC.SRX201197	M00652
EpiUwRmapDNaseBreast.vHMEC.SRX201197	M00653
EpiUwRmapDNaseBreast.vHMEC.SRX201197	M00654
EpiUwRmapDNaseBreast.vHMEC.SRX201197	M00660
EpiUwRmapDNaseBreast.vHMEC.SRX201197	M00678
EpiUwRmapDNaseBreast.vHMEC.SRX201197	M00683
EpiUwRmapDNaseBreast.vHMEC.SRX201197	M00687
EpiUwRmapDNaseBreast.vHMEC.SRX201197	M00691
EpiUwRmapDNaseBreast.vHMEC.SRX201197	M00694
EpiUwRmapDNaseBreast.vHMEC.SRX201197	M00695
EpiUwRmapDNaseBreast.vHMEC.SRX201197	M00697
EpiUwRmapDNaseBreast.vHMEC.SRX201197	M00699
EpiUwRmapDNaseBreast.vHMEC.SRX201197	M00711
EpiUwRmapDNaseBreast.vHMEC.SRX201197	M00722
EpiUwRmapDNaseBreast.vHMEC.SRX201197	M00726
EpiUwRmapDNaseBreast.vHMEC.SRX201197	M00728
EpiUwRmapDNaseBreast.vHMEC.SRX201197	M00730
EpiUwRmapDNaseBreast.vHMEC.SRX201197	M00731
EpiUwRmapDNaseBreast.vHMEC.SRX201197	M00736
EpiUwRmapDNaseBreast.vHMEC.SRX201197	M00737
EpiUwRmapDNaseBreast.vHMEC.SRX201197	M00739
EpiUwRmapDNaseBreast.vHMEC.SRX201197	M00740
EpiUwRmapDNaseBreast.vHMEC.SRX201197	M00751
EpiUwRmapDNaseBreast.vHMEC.SRX201197	M00752
EpiUwRmapDNaseBreast.vHMEC.SRX201197	M00761
EpiUwRmapDNaseBreast.vHMEC.SRX201197	M00769
EpiUwRmapDNaseBreast.vHMEC.SRX201197	M00771
EpiUwRmapDNaseBreast.vHMEC.SRX201197	M00772
EpiUwRmapDNaseBreast.vHMEC.SRX201197	M00774
EpiUwRmapDNaseBreast.vHMEC.SRX201197	M00775
EpiUwRmapDNaseBreast.vHMEC.SRX201197	M00778
EpiUwRmapDNaseBreast.vHMEC.SRX201197	M00788
EpiUwRmapDNaseBreast.vHMEC.SRX201197	M00793
EpiUwRmapDNaseBreast.vHMEC.SRX201197	M00796
EpiUwRmapDNaseBreast.vHMEC.SRX201197	M00797
EpiUwRmapDNaseBreast.vHMEC.SRX201197	M00799
EpiUwRmapDNaseBreast.vHMEC.SRX201197	M00800
EpiUwRmapDNaseBreast.vHMEC.SRX201197	M00801
EpiUwRmapDNaseBreast.vHMEC.SRX201197	M00803
EpiUwRmapDNaseBreast.vHMEC.SRX201197	M00806
EpiUwRmapDNaseBreast.vHMEC.SRX201197	M00807
EpiUwRmapDNaseBreast.vHMEC.SRX201197	M00810
EpiUwRmapDNaseBreast.vHMEC.SRX201197	M00821
EpiUwRmapDNaseBreast.vHMEC.SRX201197	M00912
EpiUwRmapDNaseBreast.vHMEC.SRX201197	M00916
EpiUwRmapDNaseBreast.vHMEC.SRX201197	M00917
EpiUwRmapDNaseBreast.vHMEC.SRX201197	M00918
EpiUwRmapDNaseBreast.vHMEC.SRX201197	M00919
EpiUwRmapDNaseBreast.vHMEC.SRX201197	M00920
EpiUwRmapDNaseBreast.vHMEC.SRX201197	M00922
EpiUwRmapDNaseBreast.vHMEC.SRX201197	M00924
EpiUwRmapDNaseBreast.vHMEC.SRX201197	M00925
EpiUwRmapDNaseBreast.vHMEC.SRX201197	M00926
EpiUwRmapDNaseBreast.vHMEC.SRX201197	M00932
EpiUwRmapDNaseBreast.vHMEC.SRX201197	M00933
EpiUwRmapDNaseBreast.vHMEC.SRX201197	M00936
EpiUwRmapDNaseBreast.vHMEC.SRX201197	M00938
EpiUwRmapDNaseBreast.vHMEC.SRX201197	M00939
EpiUwRmapDNaseBreast.vHMEC.SRX201197	M00940
EpiUwRmapDNaseBreast.vHMEC.SRX201197	M00942
EpiUwRmapDNaseBreast.vHMEC.SRX201197	M00943
EpiUwRmapDNaseBreast.vHMEC.SRX201197	M00944
EpiUwRmapDNaseBreast.vHMEC.SRX201197	M00945
EpiUwRmapDNaseBreast.vHMEC.SRX201197	M00946
EpiUwRmapDNaseBreast.vHMEC.SRX201197	M00953
EpiUwRmapDNaseBreast.vHMEC.SRX201197	M00954
EpiUwRmapDNaseBreast.vHMEC.SRX201197	M00956
EpiUwRmapDNaseBreast.vHMEC.SRX201197	M00957
EpiUwRmapDNaseBreast.vHMEC.SRX201197	M00971
EpiUwRmapDNaseBreast.vHMEC.SRX201197	M00972
EpiUwRmapDNaseBreast.vHMEC.SRX201197	M00976
EpiUwRmapDNaseBreast.vHMEC.SRX201197	M00981
EpiUwRmapDNaseBreast.vHMEC.SRX201197	M00982
EpiUwRmapDNaseBreast.vHMEC.SRX201197	M00983
EpiUwRmapDNaseBreast.vHMEC.SRX201197	M00984
EpiUwRmapDNaseBreast.vHMEC.SRX201197	M00985
EpiUwRmapDNaseBreast.vHMEC.SRX201197	M00986
EpiUwRmapDNaseBreast.vHMEC.SRX201197	M01014
EpiUwRmapDNaseBreast.vHMEC.SRX201197	M01028
EpiUwRmapDNaseBreast.vHMEC.SRX201197	M01034
EpiUwRmapDNaseBreast.vHMEC.SRX201197	M01035
EpiUwRmapDNaseBreast.vHMEC.SRX201197	M01045
EpiUwRmapDNaseBreast.vHMEC.SRX201197	M01047
EpiUwRmapDNaseBreast.vHMEC.SRX201197	M01054
EpiUwRmapDNaseBreast.vHMEC.SRX201197	M01057
EpiUwRmapDNaseBreast.vHMEC.SRX201197	M01065
EpiUwRmapDNaseBreast.vHMEC.SRX201197	M01078
EpiUwRmapDNaseBreast.vHMEC.SRX201197	M01080
EpiUwRmapDNaseBreast.vHMEC.SRX201197	M01088
EpiUwRmapDNaseBreast.vHMEC.SRX201197	M01090
EpiUwRmapDNaseBreast.vHMEC.SRX201197	M01096
EpiUwRmapDNaseBreast.vHMEC.SRX201197	M01104
EpiUwRmapDNaseBreast.vHMEC.SRX201197	M01111
EpiUwRmapDNaseBreast.vHMEC.SRX201197	M01112
EpiUwRmapDNaseBreast.vHMEC.SRX201197	M01113
EpiUwRmapDNaseBreast.vHMEC.SRX201197	M01114
EpiUwRmapDNaseBreast.vHMEC.SRX201197	M01116
EpiUwRmapDNaseBreast.vHMEC.SRX201197	M01122
EpiUwRmapDNaseBreast.vHMEC.SRX201197	M01145
EpiUwRmapDNaseBreast.vHMEC.SRX201197	M01154
EpiUwRmapDNaseBreast.vHMEC.SRX201197	M01156
EpiUwRmapDNaseBreast.vHMEC.SRX201197	M01163
EpiUwRmapDNaseBreast.vHMEC.SRX201197	M01165
EpiUwRmapDNaseBreast.vHMEC.SRX201197	M01167
EpiUwRmapDNaseBreast.vHMEC.SRX201197	M01175
EpiUwRmapDNaseBreast.vHMEC.SRX201197	M01180
EpiUwRmapDNaseBreast.vHMEC.SRX201197	M01182
EpiUwRmapDNaseBreast.vHMEC.SRX201197	M01186
EpiUwRmapDNaseBreast.vHMEC.SRX201197	M01187
EpiUwRmapDNaseBreast.vHMEC.SRX201197	M01196
EpiUwRmapDNaseBreast.vHMEC.SRX201197	M01200
EpiUwRmapDNaseBreast.vHMEC.SRX201197	M01201
EpiUwRmapDNaseBreast.vHMEC.SRX201197	M01203
EpiUwRmapDNaseBreast.vHMEC.SRX201197	M01204
EpiUwRmapDNaseBreast.vHMEC.SRX201197	M01208
EpiUwRmapDNaseBreast.vHMEC.SRX201197	M01214
EpiUwRmapDNaseBreast.vHMEC.SRX201197	M01219
EpiUwRmapDNaseBreast.vHMEC.SRX201197	M01223
EpiUwRmapDNaseBreast.vHMEC.SRX201197	M01224
EpiUwRmapDNaseBreast.vHMEC.SRX201197	M01228
EpiUwRmapDNaseBreast.vHMEC.SRX201197	M01238
EpiUwRmapDNaseBreast.vHMEC.SRX201197	M01239
EpiUwRmapDNaseBreast.vHMEC.SRX201197	M01240
EpiUwRmapDNaseBreast.vHMEC.SRX201197	M01241
EpiUwRmapDNaseBreast.vHMEC.SRX201197	M01243
EpiUwRmapDNaseBreast.vHMEC.SRX201197	M01249
EpiUwRmapDNaseBreast.vHMEC.SRX201197	M01256
EpiUwRmapDNaseBreast.vHMEC.SRX201197	M01257
EpiUwRmapDNaseBreast.vHMEC.SRX201197	M01258
EpiUwRmapDNaseBreast.vHMEC.SRX201197	M01259
EpiUwRmapDNaseBreast.vHMEC.SRX201197	M01267
EpiUwRmapDNaseBreast.vHMEC.SRX201197	M01298
EpiUwRmapDNaseBreast.vHMEC.SRX201197	M01299
EpiUwRmapDNaseBreast.vHMEC.SRX201197	M01304
EpiUwRmapDNaseBreast.vHMEC.SRX201197	M01305
EpiUwRmapDNaseBreast.vHMEC.SRX201197	M01352
EpiUwRmapDNaseBreast.vHMEC.SRX201197	M01383
EpiUwRmapDNaseBreast.vHMEC.SRX201197	M01457
EpiUwRmapDNaseBreast.vHMEC.SRX201197	M01483
EpiUwRmapDNaseBreast.vHMEC.SRX201197	M01492
EpiUwRmapDNaseBreast.vHMEC.SRX201197	M01495
EpiUwRmapDNaseBreast.vHMEC.SRX201197	M01496
EpiUwRmapDNaseBreast.vHMEC.SRX201197	M01499
EpiUwRmapDNaseBreast.vHMEC.SRX201197	M01503
EpiUwRmapDNaseBreast.vHMEC.SRX201197	M01504
EpiUwRmapDNaseBreast.vHMEC.SRX201197	M01509
EpiUwRmapDNaseBreast.vHMEC.SRX201197	M01511
EpiUwRmapDNaseBreast.vHMEC.SRX201197	M01512
EpiUwRmapDNaseBreast.vHMEC.SRX201197	M01513
EpiUwRmapDNaseBreast.vHMEC.SRX201197	M01516
EpiUwRmapDNaseBreast.vHMEC.SRX201197	M01517
EpiUwRmapDNaseBreast.vHMEC.SRX201197	M01518
EpiUwRmapDNaseBreast.vHMEC.SRX201197	M01519
EpiUwRmapDNaseBreast.vHMEC.SRX201197	M01520
EpiUwRmapDNaseBreast.vHMEC.SRX201197	M01525
EpiUwRmapDNaseBreast.vHMEC.SRX201197	M01527
EpiUwRmapDNaseBreast.vHMEC.SRX201197	M01529
EpiUwRmapDNaseBreast.vHMEC.SRX201197	M01532
EpiUwRmapDNaseBreast.vHMEC.SRX201197	M01538
EpiUwRmapDNaseBreast.vHMEC.SRX201197	M01542
EpiUwRmapDNaseBreast.vHMEC.SRX201197	M01544
EpiUwRmapDNaseBreast.vHMEC.SRX201197	M01546
EpiUwRmapDNaseBreast.vHMEC.SRX201197	M01550
EpiUwRmapDNaseBreast.vHMEC.SRX201197	M01551
EpiUwRmapDNaseBreast.vHMEC.SRX201197	M01555
EpiUwRmapDNaseBreast.vHMEC.SRX201197	M01558
EpiUwRmapDNaseBreast.vHMEC.SRX201197	M01560
EpiUwRmapDNaseBreast.vHMEC.SRX201197	M01563
EpiUwRmapDNaseBreast.vHMEC.SRX201197	M01564
EpiUwRmapDNaseBreast.vHMEC.SRX201197	M01571
EpiUwRmapDNaseBreast.vHMEC.SRX201197	M01576
EpiUwRmapDNaseBreast.vHMEC.SRX201197	M01577
EpiUwRmapDNaseBreast.vHMEC.SRX201197	M01584
EpiUwRmapDNaseBreast.vHMEC.SRX201197	M01585
EpiUwRmapDNaseBreast.vHMEC.SRX201197	M01586
EpiUwRmapDNaseBreast.vHMEC.SRX201197	M01588
EpiUwRmapDNaseBreast.vHMEC.SRX201197	M01592
EpiUwRmapDNaseBreast.vHMEC.SRX201197	M01593
EpiUwRmapDNaseBreast.vHMEC.SRX201197	M01597
EpiUwRmapDNaseBreast.vHMEC.SRX201197	M01600
EpiUwRmapDNaseBreast.vHMEC.SRX201197	M01608
EpiUwRmapDNaseBreast.vHMEC.SRX201197	M01609
EpiUwRmapDNaseBreast.vHMEC.SRX201197	M01610
EpiUwRmapDNaseBreast.vHMEC.SRX201197	M01611
EpiUwRmapDNaseBreast.vHMEC.SRX201197	M01613
EpiUwRmapDNaseBreast.vHMEC.SRX201197	M01615
EpiUwRmapDNaseBreast.vHMEC.SRX201197	M01617
EpiUwRmapDNaseBreast.vHMEC.SRX201197	M01620
EpiUwRmapDNaseBreast.vHMEC.SRX201197	M01622
EpiUwRmapDNaseBreast.vHMEC.SRX201197	M01628
EpiUwRmapDNaseBreast.vHMEC.SRX201197	M01629
EpiUwRmapDNaseBreast.vHMEC.SRX201197	M01633
EpiUwRmapDNaseBreast.vHMEC.SRX201197	M01634
EpiUwRmapDNaseBreast.vHMEC.SRX201197	M01635
EpiUwRmapDNaseBreast.vHMEC.SRX201197	M01636
EpiUwRmapDNaseBreast.vHMEC.SRX201197	M01639
EpiUwRmapDNaseBreast.vHMEC.SRX201197	M01640
EpiUwRmapDNaseBreast.vHMEC.SRX201197	M01642
EpiUwRmapDNaseBreast.vHMEC.SRX201197	M01643
EpiUwRmapDNaseBreast.vHMEC.SRX201197	M01644
EpiUwRmapDNaseBreast.vHMEC.SRX201197	M01648
EpiUwRmapDNaseBreast.vHMEC.SRX201197	M01649
EpiUwRmapDNaseBreast.vHMEC.SRX201197	M01651
EpiUwRmapDNaseBreast.vHMEC.SRX201197	M01652
EpiUwRmapDNaseBreast.vHMEC.SRX201197	M01655
EpiUwRmapDNaseBreast.vHMEC.SRX201197	M01656
EpiUwRmapDNaseBreast.vHMEC.SRX201197	M01658
EpiUwRmapDNaseBreast.vHMEC.SRX201197	M01660
EpiUwRmapDNaseBreast.vHMEC.SRX201197	M01673
EpiUwRmapDNaseBreast.vHMEC.SRX201197	M01677
EpiUwRmapDNaseBreast.vHMEC.SRX201197	M01681
EpiUwRmapDNaseBreast.vHMEC.SRX201197	M01684
EpiUwRmapDNaseBreast.vHMEC.SRX201197	M01685
EpiUwRmapDNaseBreast.vHMEC.SRX201197	M01690
EpiUwRmapDNaseBreast.vHMEC.SRX201197	M01699
EpiUwRmapDNaseBreast.vHMEC.SRX201197	M01713
EpiUwRmapDNaseBreast.vHMEC.SRX201197	M01736
EpiUwRmapDNaseBreast.vHMEC.SRX201197	M01742
EpiUwRmapDNaseBreast.vHMEC.SRX201197	M01744
EpiUwRmapDNaseBreast.vHMEC.SRX201197	M01748
EpiUwRmapDNaseBreast.vHMEC.SRX201197	M01752
EpiUwRmapDNaseBreast.vHMEC.SRX201197	M01759
EpiUwRmapDNaseBreast.vHMEC.SRX201197	M01768
EpiUwRmapDNaseBreast.vHMEC.SRX201197	M01770
EpiUwRmapDNaseBreast.vHMEC.SRX201197	M01772
EpiUwRmapDNaseBreast.vHMEC.SRX201197	M01779
EpiUwRmapDNaseBreast.vHMEC.SRX201197	M01783
EpiUwRmapDNaseBreast.vHMEC.SRX201197	M01793
EpiUwRmapDNaseBreast.vHMEC.SRX201197	M01794
EpiUwRmapDNaseBreast.vHMEC.SRX201197	M01795
EpiUwRmapDNaseBreast.vHMEC.SRX201197	M01806
EpiUwRmapDNaseBreast.vHMEC.SRX201197	M01812
EpiUwRmapDNaseBreast.vHMEC.SRX201197	M01815
EpiUwRmapDNaseBreast.vHMEC.SRX201197	M01816
EpiUwRmapDNaseBreast.vHMEC.SRX201197	M01817
EpiUwRmapDNaseBreast.vHMEC.SRX201197	M01818
EpiUwRmapDNaseBreast.vHMEC.SRX201197	M01820
EpiUwRmapDNaseBreast.vHMEC.SRX201197	M01830
EpiUwRmapDNaseBreast.vHMEC.SRX201197	M01833
EpiUwRmapDNaseBreast.vHMEC.SRX201197	M01837
EpiUwRmapDNaseBreast.vHMEC.SRX201197	M01838
EpiUwRmapDNaseBreast.vHMEC.SRX201197	M01839
EpiUwRmapDNaseBreast.vHMEC.SRX201197	M01840
EpiUwRmapDNaseBreast.vHMEC.SRX201197	M01843
EpiUwRmapDNaseBreast.vHMEC.SRX201197	M01852
EpiUwRmapDNaseBreast.vHMEC.SRX201197	M01861
EpiUwRmapDNaseBreast.vHMEC.SRX201197	M01862
EpiUwRmapDNaseBreast.vHMEC.SRX201197	M01863
EpiUwRmapDNaseBreast.vHMEC.SRX201197	M01864
EpiUwRmapDNaseBreast.vHMEC.SRX201197	M01866
EpiUwRmapDNaseBreast.vHMEC.SRX201197	M01869
EpiUwRmapDNaseBreast.vHMEC.SRX201197	M01874
EpiUwRmapDNaseBreast.vHMEC.SRX201197	M01876
EpiUwRmapDNaseBreast.vHMEC.SRX201197	M01881
EpiUwRmapDNaseBreast.vHMEC.SRX201197	M01896
EpiUwRmapDNaseBreast.vHMEC.SRX201197	M01898
EpiUwRmapDNaseBreast.vHMEC.SRX201197	M01899
EpiUwRmapDNaseBreast.vHMEC.SRX201197	M01903
EpiUwRmapDNaseBreast.vHMEC.SRX201197	M01908
EpiUwRmapDNaseBreast.vHMEC.SRX201197	M01909
EpiUwRmapDNaseBreast.vHMEC.SRX201197	M01911
EpiUwRmapDNaseBreast.vHMEC.SRX201197	M01914
EpiUwRmapDNaseBreast.vHMEC.SRX201197	M01916
EpiUwRmapDNaseBreast.vHMEC.SRX201197	M01917
EpiUwRmapDNaseBreast.vHMEC.SRX201197	M01924
EpiUwRmapDNaseBreast.vHMEC.SRX201197	M01925
EpiUwRmapDNaseBreast.vHMEC.SRX201197	M01927
EpiUwRmapDNaseBreast.vHMEC.SRX201197	M01928
EpiUwRmapDNaseBreast.vHMEC.SRX201197	M01932
EpiUwRmapDNaseBreast.vHMEC.SRX201197	M01933
EpiUwRmapDNaseBreast.vHMEC.SRX201197	M01934
EpiUwRmapDNaseBreast.vHMEC.SRX201197	M01936
EpiUwRmapDNaseBreast.vHMEC.SRX201197	M01938
EpiUwRmapDNaseBreast.vHMEC.SRX201197	M01944
EpiUwRmapDNaseBreast.vHMEC.SRX201197	M01946
EpiUwRmapDNaseBreast.vHMEC.SRX201197	M01947
EpiUwRmapDNaseBreast.vHMEC.SRX201197	M01948
EpiUwRmapDNaseBreast.vHMEC.SRX201197	M01949
EpiUwRmapDNaseBreast.vHMEC.SRX201197	M01950
EpiUwRmapDNaseBreast.vHMEC.SRX201197	M01951
EpiUwRmapDNaseBreast.vHMEC.SRX201197	M01954
EpiUwRmapDNaseBreast.vHMEC.SRX201197	M01957
EpiUwRmapDNaseBreast.vHMEC.SRX201197	M01958
EpiUwRmapDNaseBreast.vHMEC.SRX201197	M01959
EpiUwRmapDNaseBreast.vHMEC.SRX201197	M01960
EpiUwRmapDNaseBreast.vHMEC.SRX201197	M01961
EpiUwRmapDNaseBreast.vHMEC.SRX201197	M01963
EpiUwRmapDNaseBreast.vHMEC.SRX201197	M01970
EpiUwRmapDNaseBreast.vHMEC.SRX201197	M01972
EpiUwRmapDNaseBreast.vHMEC.SRX201197	M01974
EpiUwRmapDNaseBreast.vHMEC.SRX201197	M01975
EpiUwRmapDNaseBreast.vHMEC.SRX201197	M01976
EpiUwRmapDNaseBreast.vHMEC.SRX201197	M01977
EpiUwRmapDNaseBreast.vHMEC.SRX201197	M01979
EpiUwRmapDNaseBreast.vHMEC.SRX201197	M01980
EpiUwRmapDNaseBreast.vHMEC.SRX201197	M01981
EpiUwRmapDNaseBreast.vHMEC.SRX201197	M01982
EpiUwRmapDNaseBreast.vHMEC.SRX201197	M01983
EpiUwRmapDNaseBreast.vHMEC.SRX201197	M01984
EpiUwRmapDNaseBreast.vHMEC.SRX201197	M01985
EpiUwRmapDNaseBreast.vHMEC.SRX201197	M01986
EpiUwRmapDNaseBreast.vHMEC.SRX201197	M01987
EpiUwRmapDNaseBreast.vHMEC.SRX201197	M01988
EpiUwRmapDNaseBreast.vHMEC.SRX201197	M01989
EpiUwRmapDNaseBreast.vHMEC.SRX201197	M01990
EpiUwRmapDNaseBreast.vHMEC.SRX201197	M01991
EpiUwRmapDNaseBreast.vHMEC.SRX201197	M01992
EpiUwRmapDNaseBreast.vHMEC.SRX201197	M02012
EpiUwRmapDNaseBreast.vHMEC.SRX201197	M02032
EpiUwRmapDNaseBreast.vHMEC.SRX201197	M02036
EpiUwRmapDNaseBreast.vHMEC.SRX201197	M02037
EpiUwRmapDNaseBreast.vHMEC.SRX201197	M02038
EpiUwRmapDNaseBreast.vHMEC.SRX201197	M02039
EpiUwRmapDNaseBreast.vHMEC.SRX201197	M02040
EpiUwRmapDNaseBreast.vHMEC.SRX201197	M02041
EpiUwRmapDNaseBreast.vHMEC.SRX201197	M02042
EpiUwRmapDNaseBreast.vHMEC.SRX201197	M02043
EpiUwRmapDNaseBreast.vHMEC.SRX201197	MA0002.2
EpiUwRmapDNaseBreast.vHMEC.SRX201197	MA0004.1
EpiUwRmapDNaseBreast.vHMEC.SRX201197	MA0006.1
EpiUwRmapDNaseBreast.vHMEC.SRX201197	MA0007.1
EpiUwRmapDNaseBreast.vHMEC.SRX201197	MA0018.2
EpiUwRmapDNaseBreast.vHMEC.SRX201197	MA0024.1
EpiUwRmapDNaseBreast.vHMEC.SRX201197	MA0028.1
EpiUwRmapDNaseBreast.vHMEC.SRX201197	MA0032.1
EpiUwRmapDNaseBreast.vHMEC.SRX201197	MA0039.2
EpiUwRmapDNaseBreast.vHMEC.SRX201197	MA0043.1
EpiUwRmapDNaseBreast.vHMEC.SRX201197	MA0050.1
EpiUwRmapDNaseBreast.vHMEC.SRX201197	MA0052.1
EpiUwRmapDNaseBreast.vHMEC.SRX201197	MA0059.1
EpiUwRmapDNaseBreast.vHMEC.SRX201197	MA0060.1
EpiUwRmapDNaseBreast.vHMEC.SRX201197	MA0061.1
EpiUwRmapDNaseBreast.vHMEC.SRX201197	MA0062.2
EpiUwRmapDNaseBreast.vHMEC.SRX201197	MA0076.1
EpiUwRmapDNaseBreast.vHMEC.SRX201197	MA0079.2
EpiUwRmapDNaseBreast.vHMEC.SRX201197	MA0080.2
EpiUwRmapDNaseBreast.vHMEC.SRX201197	MA0088.1
EpiUwRmapDNaseBreast.vHMEC.SRX201197	MA0089.1
EpiUwRmapDNaseBreast.vHMEC.SRX201197	MA0090.1
EpiUwRmapDNaseBreast.vHMEC.SRX201197	MA0093.1
EpiUwRmapDNaseBreast.vHMEC.SRX201197	MA0098.1
EpiUwRmapDNaseBreast.vHMEC.SRX201197	MA0099.2
EpiUwRmapDNaseBreast.vHMEC.SRX201197	MA0100.1
EpiUwRmapDNaseBreast.vHMEC.SRX201197	MA0101.1
EpiUwRmapDNaseBreast.vHMEC.SRX201197	MA0102.2
EpiUwRmapDNaseBreast.vHMEC.SRX201197	MA0104.2
EpiUwRmapDNaseBreast.vHMEC.SRX201197	MA0105.1
EpiUwRmapDNaseBreast.vHMEC.SRX201197	MA0106.1
EpiUwRmapDNaseBreast.vHMEC.SRX201197	MA0107.1
EpiUwRmapDNaseBreast.vHMEC.SRX201197	MA0117.1
EpiUwRmapDNaseBreast.vHMEC.SRX201197	MA0119.1
EpiUwRmapDNaseBreast.vHMEC.SRX201197	MA0136.1
EpiUwRmapDNaseBreast.vHMEC.SRX201197	MA0138.2
EpiUwRmapDNaseBreast.vHMEC.SRX201197	MA0139.1
EpiUwRmapDNaseBreast.vHMEC.SRX201197	MA0147.1
EpiUwRmapDNaseBreast.vHMEC.SRX201197	MA0148.1
EpiUwRmapDNaseBreast.vHMEC.SRX201197	MA0150.1
EpiUwRmapDNaseBreast.vHMEC.SRX201197	MA0156.1
EpiUwRmapDNaseBreast.vHMEC.SRX201197	MA0162.1
EpiUwRmapDNaseBreast.vHMEC.SRX201197	MA0259.1
EpiUwRmapDNaseBreast.vHMEC.SRX201197	PBM0007
EpiUwRmapDNaseBreast.vHMEC.SRX201197	PBM0009
EpiUwRmapDNaseBreast.vHMEC.SRX201197	PBM0010
EpiUwRmapDNaseBreast.vHMEC.SRX201197	PBM0013
EpiUwRmapDNaseBreast.vHMEC.SRX201197	PBM0017
EpiUwRmapDNaseBreast.vHMEC.SRX201197	PBM0018
EpiUwRmapDNaseBreast.vHMEC.SRX201197	PBM0020
EpiUwRmapDNaseBreast.vHMEC.SRX201197	PBM0022
EpiUwRmapDNaseBreast.vHMEC.SRX201197	PBM0023
EpiUwRmapDNaseBreast.vHMEC.SRX201197	PBM0029
EpiUwRmapDNaseBreast.vHMEC.SRX201197	PBM0035
EpiUwRmapDNaseBreast.vHMEC.SRX201197	PBM0041
EpiUwRmapDNaseBreast.vHMEC.SRX201197	PBM0049
EpiUwRmapDNaseBreast.vHMEC.SRX201197	PBM0050
EpiUwRmapDNaseBreast.vHMEC.SRX201197	PBM0051
EpiUwRmapDNaseBreast.vHMEC.SRX201197	PBM0052
EpiUwRmapDNaseBreast.vHMEC.SRX201197	PBM0053
EpiUwRmapDNaseBreast.vHMEC.SRX201197	PBM0054
EpiUwRmapDNaseBreast.vHMEC.SRX201197	PBM0055
EpiUwRmapDNaseBreast.vHMEC.SRX201197	PBM0057
EpiUwRmapDNaseBreast.vHMEC.SRX201197	PBM0060
EpiUwRmapDNaseBreast.vHMEC.SRX201197	PBM0063
EpiUwRmapDNaseBreast.vHMEC.SRX201197	PBM0065
EpiUwRmapDNaseBreast.vHMEC.SRX201197	PBM0068
EpiUwRmapDNaseBreast.vHMEC.SRX201197	PBM0074
EpiUwRmapDNaseBreast.vHMEC.SRX201197	PBM0080
EpiUwRmapDNaseBreast.vHMEC.SRX201197	PBM0081
EpiUwRmapDNaseBreast.vHMEC.SRX201197	PBM0082
EpiUwRmapDNaseBreast.vHMEC.SRX201197	PBM0083
EpiUwRmapDNaseBreast.vHMEC.SRX201197	PBM0085
EpiUwRmapDNaseBreast.vHMEC.SRX201197	PBM0086
EpiUwRmapDNaseBreast.vHMEC.SRX201197	PBM0087
EpiUwRmapDNaseBreast.vHMEC.SRX201197	PBM0089
EpiUwRmapDNaseBreast.vHMEC.SRX201197	PBM0090
EpiUwRmapDNaseBreast.vHMEC.SRX201197	PBM0091
EpiUwRmapDNaseBreast.vHMEC.SRX201197	PBM0093
EpiUwRmapDNaseBreast.vHMEC.SRX201197	PBM0094
EpiUwRmapDNaseBreast.vHMEC.SRX201197	PBM0095
EpiUwRmapDNaseBreast.vHMEC.SRX201197	PBM0096
EpiUwRmapDNaseBreast.vHMEC.SRX201197	PBM0097
EpiUwRmapDNaseBreast.vHMEC.SRX201197	PBM0098
EpiUwRmapDNaseBreast.vHMEC.SRX201197	PBM0100
EpiUwRmapDNaseBreast.vHMEC.SRX201197	PBM0101
EpiUwRmapDNaseBreast.vHMEC.SRX201197	PBM0102
EpiUwRmapDNaseBreast.vHMEC.SRX201197	PBM0103
EpiUwRmapDNaseBreast.vHMEC.SRX201197	PBM0104
EpiUwRmapDNaseBreast.vHMEC.SRX201197	PBM0105
EpiUwRmapDNaseBreast.vHMEC.SRX201197	PBM0107
EpiUwRmapDNaseBreast.vHMEC.SRX201197	PBM0108
EpiUwRmapDNaseBreast.vHMEC.SRX201197	PBM0109
EpiUwRmapDNaseBreast.vHMEC.SRX201197	PBM0112
EpiUwRmapDNaseBreast.vHMEC.SRX201197	PBM0113
EpiUwRmapDNaseBreast.vHMEC.SRX201197	PBM0114
EpiUwRmapDNaseBreast.vHMEC.SRX201197	PBM0115
EpiUwRmapDNaseBreast.vHMEC.SRX201197	PBM0116
EpiUwRmapDNaseBreast.vHMEC.SRX201197	PBM0117
EpiUwRmapDNaseBreast.vHMEC.SRX201197	PBM0118
EpiUwRmapDNaseBreast.vHMEC.SRX201197	PBM0119
EpiUwRmapDNaseBreast.vHMEC.SRX201197	PBM0120
EpiUwRmapDNaseBreast.vHMEC.SRX201197	PBM0121
EpiUwRmapDNaseBreast.vHMEC.SRX201197	PBM0122
EpiUwRmapDNaseBreast.vHMEC.SRX201197	PBM0123
EpiUwRmapDNaseBreast.vHMEC.SRX201197	PBM0124
EpiUwRmapDNaseBreast.vHMEC.SRX201197	PBM0125
EpiUwRmapDNaseBreast.vHMEC.SRX201197	PBM0126
EpiUwRmapDNaseBreast.vHMEC.SRX201197	PBM0127
EpiUwRmapDNaseBreast.vHMEC.SRX201197	PBM0128
EpiUwRmapDNaseBreast.vHMEC.SRX201197	PBM0129
EpiUwRmapDNaseBreast.vHMEC.SRX201197	PBM0130
EpiUwRmapDNaseBreast.vHMEC.SRX201197	PBM0131
EpiUwRmapDNaseBreast.vHMEC.SRX201197	PBM0132
EpiUwRmapDNaseBreast.vHMEC.SRX201197	PBM0133
EpiUwRmapDNaseBreast.vHMEC.SRX201197	PBM0134
EpiUwRmapDNaseBreast.vHMEC.SRX201197	PBM0135
EpiUwRmapDNaseBreast.vHMEC.SRX201197	PBM0141
EpiUwRmapDNaseBreast.vHMEC.SRX201197	PBM0151
EpiUwRmapDNaseBreast.vHMEC.SRX201197	PBM0155
EpiUwRmapDNaseBreast.vHMEC.SRX201197	PBM0168
EpiUwRmapDNaseBreast.vHMEC.SRX201197	PBM0171
EpiUwRmapDNaseBreast.vHMEC.SRX201197	PBM0172
EpiUwRmapDNaseBreast.vHMEC.SRX201197	PBM0175
EpiUwRmapDNaseBreast.vHMEC.SRX201197	PBM0188
EpiUwRmapDNaseBreast.vHMEC.SRX201197	PBM0190
EpiUwRmapDNaseBreast.vHMEC.SRX201197	PBM0195
EpiUwRmapDNaseBreast.vHMEC.SRX201197	PBM0200
EpiUwRmapDNaseBreast.vHMEC.SRX201197	PBM0203
EpiUwRmapDNaseCD14.Primary.Cells.SRX040416	M00007
EpiUwRmapDNaseCD14.Primary.Cells.SRX040416	M00008
EpiUwRmapDNaseCD14.Primary.Cells.SRX040416	M00014
EpiUwRmapDNaseCD14.Primary.Cells.SRX040416	M00015
EpiUwRmapDNaseCD14.Primary.Cells.SRX040416	M00016
EpiUwRmapDNaseCD14.Primary.Cells.SRX040416	M00017
EpiUwRmapDNaseCD14.Primary.Cells.SRX040416	M00025
EpiUwRmapDNaseCD14.Primary.Cells.SRX040416	M00026
EpiUwRmapDNaseCD14.Primary.Cells.SRX040416	M00032
EpiUwRmapDNaseCD14.Primary.Cells.SRX040416	M00035
EpiUwRmapDNaseCD14.Primary.Cells.SRX040416	M00036
EpiUwRmapDNaseCD14.Primary.Cells.SRX040416	M00037
EpiUwRmapDNaseCD14.Primary.Cells.SRX040416	M00038
EpiUwRmapDNaseCD14.Primary.Cells.SRX040416	M00039
EpiUwRmapDNaseCD14.Primary.Cells.SRX040416	M00040
EpiUwRmapDNaseCD14.Primary.Cells.SRX040416	M00041
EpiUwRmapDNaseCD14.Primary.Cells.SRX040416	M00043
EpiUwRmapDNaseCD14.Primary.Cells.SRX040416	M00045
EpiUwRmapDNaseCD14.Primary.Cells.SRX040416	M00049
EpiUwRmapDNaseCD14.Primary.Cells.SRX040416	M00050
EpiUwRmapDNaseCD14.Primary.Cells.SRX040416	M00051
EpiUwRmapDNaseCD14.Primary.Cells.SRX040416	M00052
EpiUwRmapDNaseCD14.Primary.Cells.SRX040416	M00053
EpiUwRmapDNaseCD14.Primary.Cells.SRX040416	M00054
EpiUwRmapDNaseCD14.Primary.Cells.SRX040416	M00055
EpiUwRmapDNaseCD14.Primary.Cells.SRX040416	M00062
EpiUwRmapDNaseCD14.Primary.Cells.SRX040416	M00064
EpiUwRmapDNaseCD14.Primary.Cells.SRX040416	M00067
EpiUwRmapDNaseCD14.Primary.Cells.SRX040416	M00069
EpiUwRmapDNaseCD14.Primary.Cells.SRX040416	M00074
EpiUwRmapDNaseCD14.Primary.Cells.SRX040416	M00108
EpiUwRmapDNaseCD14.Primary.Cells.SRX040416	M00109
EpiUwRmapDNaseCD14.Primary.Cells.SRX040416	M00113
EpiUwRmapDNaseCD14.Primary.Cells.SRX040416	M00114
EpiUwRmapDNaseCD14.Primary.Cells.SRX040416	M00115
EpiUwRmapDNaseCD14.Primary.Cells.SRX040416	M00116
EpiUwRmapDNaseCD14.Primary.Cells.SRX040416	M00117
EpiUwRmapDNaseCD14.Primary.Cells.SRX040416	M00118
EpiUwRmapDNaseCD14.Primary.Cells.SRX040416	M00119
EpiUwRmapDNaseCD14.Primary.Cells.SRX040416	M00121
EpiUwRmapDNaseCD14.Primary.Cells.SRX040416	M00122
EpiUwRmapDNaseCD14.Primary.Cells.SRX040416	M00123
EpiUwRmapDNaseCD14.Primary.Cells.SRX040416	M00134
EpiUwRmapDNaseCD14.Primary.Cells.SRX040416	M00138
EpiUwRmapDNaseCD14.Primary.Cells.SRX040416	M00139
EpiUwRmapDNaseCD14.Primary.Cells.SRX040416	M00152
EpiUwRmapDNaseCD14.Primary.Cells.SRX040416	M00165
EpiUwRmapDNaseCD14.Primary.Cells.SRX040416	M00171
EpiUwRmapDNaseCD14.Primary.Cells.SRX040416	M00172
EpiUwRmapDNaseCD14.Primary.Cells.SRX040416	M00173
EpiUwRmapDNaseCD14.Primary.Cells.SRX040416	M00174
EpiUwRmapDNaseCD14.Primary.Cells.SRX040416	M00177
EpiUwRmapDNaseCD14.Primary.Cells.SRX040416	M00178
EpiUwRmapDNaseCD14.Primary.Cells.SRX040416	M00179
EpiUwRmapDNaseCD14.Primary.Cells.SRX040416	M00182
EpiUwRmapDNaseCD14.Primary.Cells.SRX040416	M00187
EpiUwRmapDNaseCD14.Primary.Cells.SRX040416	M00188
EpiUwRmapDNaseCD14.Primary.Cells.SRX040416	M00190
EpiUwRmapDNaseCD14.Primary.Cells.SRX040416	M00193
EpiUwRmapDNaseCD14.Primary.Cells.SRX040416	M00194
EpiUwRmapDNaseCD14.Primary.Cells.SRX040416	M00197
EpiUwRmapDNaseCD14.Primary.Cells.SRX040416	M00198
EpiUwRmapDNaseCD14.Primary.Cells.SRX040416	M00199
EpiUwRmapDNaseCD14.Primary.Cells.SRX040416	M00201
EpiUwRmapDNaseCD14.Primary.Cells.SRX040416	M00204
EpiUwRmapDNaseCD14.Primary.Cells.SRX040416	M00208
EpiUwRmapDNaseCD14.Primary.Cells.SRX040416	M00210
EpiUwRmapDNaseCD14.Primary.Cells.SRX040416	M00215
EpiUwRmapDNaseCD14.Primary.Cells.SRX040416	M00217
[truncated: 492,173+ more rows]
