# Supplementary material for: Which Genetics Variants in DNase-Seq Footprints Are More Likely to Alter Binding?
Source: PLoS Genet. 2016 Feb 22;12(2):e1005875. doi: 10.1371/journal.pgen.1005875 (PMC4764260; doi:10.1371/journal.pgen.1005875)
Supplement: S6 Table — The first three rows show the threshold and number of samples filtered for each parameter independently. After applying the three filters, the remaining samples were manually examined and known cancer samples were removed. (XLSX) [file pgen.1005875.s011.xlsx]

## Sheet: Sheet1
Parameter	Threshold	# Removed
Avg. 𝝆	< 0.54	78
|cor(𝝆,ɸ)|	< 0.15	31
1/Disp. (M)	> 12	58
Cancer†	-	13
†without evident chromosomal abnormalities
