# Supplementary material for: Which Genetics Variants in DNase-Seq Footprints Are More Likely to Alter Binding?
Source: PLoS Genet. 2016 Feb 22;12(2):e1005875. doi: 10.1371/journal.pgen.1005875 (PMC4764260; doi:10.1371/journal.pgen.1005875)
Supplement: S8 Table — We considered the following characteristics in a regression analysis to determine their predictiveness as to whether a footprint-SNP is also an effect-SNP. (XLSX) [file pgen.1005875.s013.xlsx]

## Sheet: Sheet1
	Effect Size	p-value
Sequence change†	0.0001051	< 10E-16
TSS Distance (bp)	-2.904e-08	< 10E-16
Number of Tissues	-0.0004636	< 10E-16
Minor Allele Frequency	-0.05169	< 10E-16
Primate Conservation‡	-0.009155	< 10E-16
†units are log-fold change in factor affinity between alleles
‡based on phyloP scores from 46-way multiple alignment (Section 1 of S1 Text)
