# Supplementary material for: Which Genetics Variants in DNase-Seq Footprints Are More Likely to Alter Binding?
Source: PLoS Genet. 2016 Feb 22;12(2):e1005875. doi: 10.1371/journal.pgen.1005875 (PMC4764260; doi:10.1371/journal.pgen.1005875)
Supplement: S10 Table — Motifs corresponding to the same transcription factor are similarly enriched or depleted for ASH-hSNPs. (XLSX) [file pgen.1005875.s015.xlsx]

## Sheet: Sheet1
Factor	ID	hSNPs	ASH-hSNPs	ASH-hSNPs/hSNPs	Fold-enrichment	p-value
AP-1	M00517	461	10	0.021692	1.03603	0.869968
	M00188	296	16	0.0540541	2.58168	0.000608884
	M00199	111	22	0.198198	9.46614	1.81e-15
	M00924	181	13	0.0718232	3.43035	0.000131074
	M00925	159	16	0.100629	4.80614	2.94e-07
	M00926	210	24	0.114286	5.4584	2.6e-11
	MA0099.2	1931	250	0.129467	6.18345	2.91e-114
CBF1	M01577	193	3	0.015544	0.742399	0.80262
	M01699	403	8	0.0198511	0.948109	1
	M01793	168	2	0.0119048	0.568583	0.59156
	M01911	135	5	0.037037	1.76893	0.21198
CREB	M00113	451	14	0.0310421	1.4826	0.136347
	M00178	136	4	0.0294118	1.40473	0.37454
	M00916	950	32	0.0336842	1.60879	0.0119176
	M00917	188	4	0.0212766	1.01619	0.800446
	M00801	675	59	0.0874074	4.17466	1.08e-19
CTCF	M01259	3500	49	0.014	0.668654	0.00309612
	MA0139.1	3426	43	0.0125511	0.599452	0.000327385
	M01196	479	35	0.0730689	3.48984	3.37e-10
E2F/E2F-1	M00024	1001	11	0.010989	0.524846	0.0263622
	M00425	949	16	0.0168599	0.805243	0.494597
	M00427	508	7	0.0137795	0.658124	0.349488
	M00918	1131	21	0.0185676	0.886809	0.677353
	M00920	1117	13	0.0116383	0.555858	0.0275452
	M01114	577	5	0.00866551	0.413873	0.0398363
	M00426	2017	7	0.0034705	0.165755	3.17e-11
	M00516	1792	7	0.00390625	0.186566	1.67e-09
	M00428	3085	49	0.0158833	0.758602	0.0509454
	M00431	992	17	0.0171371	0.818485	0.504382
	M00940	2007	32	0.0159442	0.761511	0.137608
	M00939	1353	10	0.00739098	0.353001	0.00012598
	M01251	224	2	0.00892857	0.426437	0.342585
	MA0024.1	158	2	0.0126582	0.604569	0.777198
Staf	M00262	1132	2	0.00176678	0.0843833	3.07e-08
	M00264	442	0	0	0	0.000167517
XBP1	M00251	257	5	0.0194553	0.929202	1
	M01770	452	13	0.0287611	1.37366	0.246263
	M01970	674	6	0.00890208	0.425172	0.0296527
	M01513	985	5	0.00507614	0.242442	7.9e-05
	M01947	607	4	0.00658979	0.314735	0.00973436
