# Supplementary material for: Which Genetics Variants in DNase-Seq Footprints Are More Likely to Alter Binding?
Source: PLoS Genet. 2016 Feb 22;12(2):e1005875. doi: 10.1371/journal.pgen.1005875 (PMC4764260; doi:10.1371/journal.pgen.1005875)
Supplement: S14 Table — For each trait, factors whose binding sites are enriched for SNPs associated with the trait are listed. Shown also are the lower and upper limits of the 95% confidence interval. (XLSX) [file pgen.1005875.s019.xlsx]

## Sheet: Table
Trait	Motif	Factor	CI_low	Enrichment	CI_high
BMI	MA0060.1	NFYA	5.55302	9.04203	20
BMI	M00287	NF-Y	5.9456	9.01072	20
BMI	M01572	MIG1	3.79883	6.67643	8.55185
BMI	M01949	Ybr239c	1.17777	5.5875	7.88149
BMI	M01608	DAL82	0.840795	4.52733	6.49887
CD	M00197	ABF1	3.58073	6.76224	8.62558
CD	M01180	SPL14	3.48815	6.56354	8.58496
CD	M01597	Zfp281	1.71902	5.79346	7.36162
CD	M00664	STE12	2.34086	5.52722	7.32375
CD	M01923	Rox1	2.92117	5.45665	6.78096
CD	M01068	Zfp281	1.69806	5.17694	6.62966
CD	M02032	SWI4	2.08844	4.75803	6.12229
CD	M00016	E74A	1.50995	4.62467	6.53042
CD	PBM0124	Elf4	1.02917	4.02726	5.69186
CD	M00433	Hmx3 (Nkx5-1)	0.388488	3.49063	5.1282
CD	PBM0118	Elf4_RC	0.317524	3.32183	4.99215
FG	M01883	IRF-4	3.72161	7.17555	9.41011
FG	MA0019.1	Ddit3::Cebpa	3.87792	7.00007	8.8626
FG	M01346	TGIF1	2.96686	6.7605	8.60353
FG	M01621	SOK2	2.33456	6.54948	8.69529
FG	M00698	HEB	0.499274	4.4129	7.4186
FNBMD	M00063	IRF-2	4.80474	8.19383	11.1567
FNBMD	M01609	SWI4	5.49081	8.11876	10.1442
FNBMD	M00355	PBF	3.46023	6.74198	8.51611
FNBMD	M00459	STAT5B (homodimer)	1.78398	6.18312	8.45174
FNBMD	M00241	Nkx2-5	2.75458	5.88895	7.81268
FNBMD	M01030	Rim101p	0.524025	5.76483	7.69182
FNBMD	M01644	EDS1	1.90104	5.62649	8.40933
FNBMD	M00720	CAC-binding protein	1.45282	5.5159	7.53219
FNBMD	M01542	PBF1	2.12468	5.37274	7.00738
FNBMD	M01917	Ynr063w	0.367415	5.05136	6.78268
FNBMD	M00313	GEN_INI	1.67179	4.87505	7.08281
FNBMD	M00357	bZIP910	0.668353	4.55182	6.31701
FNBMD	PBM0023	/GR09/Mbp1	-0.068878	3.6864	5.46481
FNBMD	M01550	Mbp1	-0.0970683	3.67623	5.44976
FNBMD	M01181	Nkx3-2	0.399854	3.63258	5.43027
HB	M00089	Athb-1	6.55846	37.7575	57
HB	M01245	mTERF	6.47033	32.2038	52
HB	M01888	Smad3	5.75039	9.53457	12.9244
HB	PBM0129	/EMBO10/Elk1	5.11921	8.82508	11.2967
HB	PBM0119	/EMBO10/Elk1_RC	3.92731	8.13732	10.3753
HB	M00361	CDC5	4.02486	7.76719	10.4158
HB	M01653	HMGIY	3.13919	6.98299	8.73736
HB	M01774	TBR2	2.36066	6.86355	8.91365
HB	M00187	USF/E-Box	2.97054	6.58806	8.5384
HB	PBM0009	/GR09/Aro80	1.49361	4.65375	6.6954
HB	M01538	Aro80	1.47969	4.62347	6.62703
HB	M00986	Churchill	0.406077	3.35793	5.12423
HDL	MA0079.2	SP1	2.4743	7.0176	10.7631
HDL	M02043	SPI1 (PU.1)	2.33198	6.59276	8.96255
HDL	MA0141.1	Esrrb	2.97375	6.46724	8.28309
HDL	M00932	Sp1	1.97277	6.44518	9.90602
HDL	M01589	ERR2 (ESRRB)	2.70533	6.40534	8.27171
HDL	M02041	Spi-B	0.270971	6.351	8.3227
HDL	M01204	SPI-B	1.56835	6.24473	8.07724
HDL	M01461	EMX2	2.47543	5.7441	7.50003
HDL	M01175	CKROX	2.52767	5.19464	6.60843
HDL	PBM0036	/GR09/Sfl1	0.881123	4.7409	6.37506
HDL	M00332	Whn	0.497066	4.50283	6.7833
HDL	M01946	LYS14	0.852962	4.46586	6.06633
HDL	M01641	RFX1	0.942619	4.31607	5.83236
Height	MA0041.1	Pou5f1	3.68627	6.6498	8.27344
Height	MA0142.1	Oct-4 (POU5F1)	2.94939	6.04572	8.02647
Height	M00241	SREBP	0.9632	4.83148	6.45938
Height	M00776	Oct-4 (POU5F1)	1.72542	4.74974	6.45959
Height	M00792	Nkx2-5	1.505	4.6989	6.25506
Height	M00104	SMAD	1.2858	4.41931	5.93133
Height	M01114	CDP CR1	1.33895	4.06501	5.35813
Height	M01124	TBX15	0.793183	3.93129	5.57141
Height	M01125	Foxd3	0.686681	3.85904	5.20943
Height	M01264	RFX1	0.897813	3.23424	4.34014
Height	M01641	E2F	0.100087	2.85298	4.12103
LDL	M01742	Zfp206	4.77132	9.29028	13.1511
LDL	M00638	HNF4alpha	4.80413	9.09022	12.9893
LDL	M00063	IRF-2	3.51849	7.12886	9.87482
LDL	M00753	RCS1	1.94261	6.62587	8.80103
LDL	MA0069.1	Pax6	3.5085	6.6044	8.52361
LDL	M00169	HSF	2.11409	6.55563	9.02839
LDL	M00206	HNF1	1.43306	6.49589	8.89576
LDL	M00062	IRF-1	2.12146	6.19944	8.40109
LDL	M00037	NF-E2	3.37904	6.19513	7.79651
LDL	M00517	AP-1	0.489034	5.53737	7.06971
LDL	M01812	TGA2	3.05816	5.00128	6.31158
LDL	M01863	ATF-3	1.95371	4.92333	6.34855
LDL	M00513	ATF3	1.97873	4.42723	5.88088
LDL	M00942	CPRF-1	2.4655	4.26845	5.494
LDL	M00187	USF/E-Box	0.116892	4.24304	6.41851
LDL	PBM0176	Cell09/HLH-29	0.322787	4.21869	5.81434
LDL	PBM0191	Cell09/HLH-29_RC	0.322062	4.21783	5.81356
LDL	M00359	bZIP911	1.83069	4.16943	5.4085
LDL	M01586	TGA2	1.08609	4.16599	5.98107
LDL	M00440	CG1	0.476193	4.09304	5.77188
LDL	M00041	ATF2:c-Jun	1.9485	3.85249	5.13552
LDL	MA0018.2	CREB1	0.666624	3.6895	5.38931
LDL	M01862	ATF-2	0.648263	3.67371	5.38114
LDL	M00338	ATF	0.564348	3.59416	5.23349
LDL	M00981	CREB, ATF	0.509337	3.53682	5.2488
LDL	M00017	ATF	1.38766	3.31087	4.60301
LSBMD	M01125	Oct-4	4.04432	9.68104	20
LSBMD	M00459	STAT5B	3.84432	7.20957	9.1338
LSBMD	M01537	DOT6	2.39788	6.54106	8.9538
LSBMD	MA0106.1	TP53	0.400091	6.1532	8.81764
LSBMD	MA0117.1	Mafb	1.13445	5.951	7.99913
LSBMD	M01733	MZF1	2.43187	5.72248	7.92848
LSBMD	PBM0090	Pbf1	1.25435	5.09286	6.62326
LSBMD	M01525	Put3	2.60956	4.9513	6.54848
LSBMD	M00982	KROX	1.43124	4.80404	6.75491
LSBMD	PBM0087	Put3	2.348	4.75751	6.36622
LSBMD	M00307	REB1	0.899319	4.58214	6.40089
LSBMD	M01175	CKROX	0.0863034	3.96501	5.79725
MCH	M01234	IPF1	5.68447	9.07669	12.4711
MCH	M00332	Whn	1.38729	6.00291	7.89767
MCH	M00496	STAT1	3.70108	5.98795	7.52951
MCH	M00513	ATF3	0.562874	4.71976	6.53348
MCH	M01770	XBP1	1.50049	4.21243	5.88804
MCH	M00942	CPRF-1	1.65287	4.14681	5.58099
MCH	M00235	AhR:Arnt	1.38288	4.13215	5.67785
MCH	MA0093.1	USF1	0.411565	3.83197	5.26953
MCH	M01065	ABZ1	1.42408	3.76906	5.27225
MCH	M01175	CKROX	0.484455	3.56285	5.3682
MCH	M01550	Mbp1	0.167049	3.17583	4.84272
MCH	M01673	ARG RI	0.172439	3.14532	4.74671
MCHC	M00764	HNF4	4.71107	8.77439	12.6843
MCHC	M01746	Tbf1	4.07697	8.18607	20
MCHC	M00411	HNF4alpha1	3.6265	7.32551	10.1213
MCHC	M00345	GAMYB	4.3901	7.29862	9.35217
MCHC	M00261	Olf-1	3.13635	6.60828	9.40292
MCHC	M01030	Rim101p	2.72237	6.04724	8.20306
MCHC	M01162	OG-2	0.377143	5.59865	7.40014
MCHC	M01240	BEN	1.98208	5.31408	7.67107
MCHC	M01641	RFX1	1.35951	5.04675	7.23557
MCHC	M01658	AML1	2.00823	4.54236	6.3623
MCHC	M00986	Churchill	0.423278	3.48368	5.40636
MCV	PBM0192	MDL-1	5.58274	9.39464	12.7867
MCV	PBM0187	MDL-1_RC	5.57898	9.39032	12.7838
MCV	M00309	ACAAT	0.583838	6.43393	8.59817
MCV	M01197	ELF5	3.17382	6.09065	7.97863
MCV	M01223	P50:P50	1.96732	5.82689	8.42528
MCV	M00496	STAT1	3.40173	5.55607	7.10029
MCV	M00513	ATF3	1.64473	4.51118	6.17345
MCV	MA0018.2	CREB1	0.939904	4.24034	5.90721
MCV	M01641	RFX1	1.58996	4.18106	5.62153
MCV	M01770	XBP1	1.77187	3.97834	5.54853
MCV	MA0100.1	Myb	1.1695	3.95313	5.37991
MCV	M01055	NAC69-1	0.501182	3.92452	5.76139
MCV	M01863	ATF-3	0.181023	3.75327	5.44643
MCV	M00041	ATF2:c-Jun	0.717463	3.74161	5.20281
MCV	M00017	ATF	0.964787	3.73089	4.87201
MCV	M01065	ABZ1	1.31021	3.71163	5.24771
MCV	M01175	CKROX	0.518777	3.67929	5.4935
MCV	M00942	CPRF-1	0.949139	3.61607	5.07283
PCV	M01746	Tbf1	5.42483	9.03048	12.6452
PCV	MA0032.1	FOXC1	4.91208	8.75605	12.1197
PCV	PBM0055	Sum1	3.07073	7.85555	9.73558
PCV	M00187	USF/E-Box	2.90125	6.14562	8.4204
PCV	M00361	CDC5	2.33118	6.01295	8.84811
PCV	M00262	Staf	2.62879	5.9467	8.11806
PCV	M00115	Tax/CREB	1.72636	5.78401	7.95322
PCV	M00440	CG1	1.72387	5.07638	7.21452
PCV	M00441	GBF	1.46419	4.78616	6.71012
PCV	M00942	CPRF-1	1.03682	4.46464	6.42005
PLT	MA0092.1	Hand1::Tcfe2a	5.96293	9.36755	12.7148
PLT	M01653	HMGIY	2.00806	4.98655	6.60881
PLT	M01492	Ynr063w	1.08987	4.71897	6.29682
PLT	M00513	ATF3	1.41627	4.62414	6.04465
PLT	M01917	Ynr063w	0.477124	4.48972	6.04876
PLT	PBM0083	Ynr063w	0.306941	4.44265	6.03057
PLT	M01784	UPC2	1.34013	4.43119	6.07434
PLT	M00171	Adf-1	0.795645	4.42707	6.92927
PLT	MA0048.1	NHLH1	1.07081	4.3319	6.08285
PLT	M01814	AML2	0.00395933	4.25606	5.97236
PLT	M00178	CREB	1.64663	4.20533	5.57938
PLT	M00801	CREB	1.24254	3.8877	5.15473
PLT	M00739	E2F-4:DP-2	0.75591	3.73962	5.34881
PLT	M00736	E2F-1:DP-1	0.749252	3.73491	5.35421
PLT	MA0099.2	AP1	0.532645	3.41867	4.88126
PLT	M00737	E2F-1:DP-2	0.393984	3.37439	4.96809
RBC	PBM0111	Sfpi1_RC	5.80335	8.15573	10.1267
RBC	PBM0133	Spic_RC	3.67939	7.68953	9.88093
RBC	M01172	PU.1	3.16456	7.49875	9.39147
RBC	PBM0134	Spic	3.14047	7.49691	9.7023
RBC	M00496	STAT1	1.67963	5.8613	7.87341
RBC	M00187	USF/E-Box	1.91027	5.60693	7.69995
RBC	M00262	Staf	2.0214	5.37512	7.63479
RBC	M00492	STAT1	1.05715	5.23966	6.85208
RBC	M00942	CPRF-1	2.07651	4.7752	6.39666
RBC	M01797	SIRT6	0.526198	4.27848	7.0358
RBC	M00440	CG1	0.361546	4.22006	6.15725
RBC	M00441	GBF	0.0473948	4.11802	5.87404
RBC	M00261	Olf-1	0.520846	3.8049	6.10076
RBC	M00694	E4F1	0.757894	3.66774	5.29972
RBC	M00789	GATA	0.0939834	3.54993	5.6618
RBC	M01709	MAFA	0.0229792	3.31757	5.11406
TC	M00169	HSF	2.859	6.61643	8.92763
TC	M01461	EMX2	3.10099	6.36815	8.03913
TC	M01812	TGA2	1.5368	4.38987	5.88623
TC	M00187	USF/E-Box	0.414511	4.2335	6.32749
TC	M01636	STB4	1.46032	3.85921	5.14762
TC	M00942	CPRF-1	1.66593	3.68641	5.02961
TC	M00338	ATF	0.271155	3.2829	4.91935
TG	M01396	HOXB7	6.25013	9.62051	12.4041
TG	M01848	TCP15	5.96667	9.07284	12.5024
TG	M00169	HSF	3.93267	8.04865	10.7635
TG	M01359	Dobox4	2.87344	7.85086	10.291
TG	M00205	GR	4.21621	7.73222	10.3766
TG	M01437	HOXC12	2.95381	7.45239	9.70176
TG	M00238	Barbie Box	3.21066	6.63495	8.62488
TG	M01204	SPI-B	3.62592	6.36915	8.09542
TG	M01806	GBF1	3.63141	6.1937	7.782
TG	M01617	ZMS1	2.12868	5.65815	7.75748
TG	M00486	Pax-2	2.29566	5.62111	7.68121
TG	M00720	CAC-binding protein	1.98152	5.30935	7.11011
TG	M00658	PU.1	0.899358	4.11247	5.86328
