# Supplementary material for: Which Genetics Variants in DNase-Seq Footprints Are More Likely to Alter Binding?
Source: PLoS Genet. 2016 Feb 22;12(2):e1005875. doi: 10.1371/journal.pgen.1005875 (PMC4764260; doi:10.1371/journal.pgen.1005875)
Supplement: S15 Table — PPA, Posterior probability of association estimated by fgwas for each SNP. “Before” indicates the PPA from the base model, “after” indicates the PPA after adding footprint annotations to the model. The p-values listed are derived from the z-scores that are used as input for fgwas. (XLSX) [file pgen.1005875.s020.xlsx]

## Sheet: Sheet1
Trait	Motif	Factor	rsID	PPA before	PPA after	p-value
BMI	M00287	NF-Y	rs12641981	0.2133	0.9486	3.67e-17
BMI	M00287	NF-Y	rs13098327	0.3105	0.9709	5.7e-08
BMI	M01608	DAL82	rs4704230	0.2867	0.6469	8.95e-08
CD	M00197	ABF1	rs1052248	0.0518	0.2537	5.59e-11
CD	PBM0124	Elf4	rs2476601	0.7872	0.9985	2.18e-09
CD	M00433	Hmx3 (Nkx5-1)	rs3810936	0.0681	0.974	4.87e-16
CD	M00664	STE12	rs3828917	0.0297	0.7407	2.1e-07
CD	M02032	SWI4	rs7746082	0.1133	0.632	2.25e-08
FG	M00698	HEB	rs13266634	0.9479	0.9908	3.93e-17
FG	MA0019.1	Ddit3::Cebpa	rs2191348	0.2111	0.4478	4.19e-21
FNBMD	M01644	EDS1	rs10205005	0.1831	0.3384	2.2e-07
FNBMD	M01550	Mbp1	rs383911	0.4307	0.8084	1.12e-16
FNBMD	M00357	bZIP910	rs6426749	0.2642	0.5711	1.03e-23
FNBMD	M00241	Nkx2-5	rs7466269	0.7019	0.9613	1.91e-08
HB	M01538	Aro80	rs13219787	0.8098	0.9741	5.23e-09
HB	M00986	Churchill	rs198846	0.9989	0.9998	7.11e-31
HDL	M00332	Whn	rs1044973	0.3681	0.7553	7.65e-08
HDL	M01641	RFX1	rs12740374	0.266	0.6177	3.1e-08
HDL	M01946	LYS14	rs676210	0.2959	0.6569	1.33e-30
HDL	M01461	EMX2	rs6907508	0.2188	0.4655	3.65e-10
Height	MA0041.1	Foxd3	rs10171985	0.0359	0.2022	2.99e-07
Height	M01114	E2F	rs11752007	0.7399	0.9523	4.84e-08
Height	M01264	TBX15	rs11752007	0.7399	0.9553	4.84e-08
Height	M01641	RFX1	rs12740374	0.0837	0.5101	3.81e-05
Height	MA0142.1	Pou5f1	rs17511102	0.9989	0.9999	6.32e-13
Height	M01641	RFX1	rs314263	0.2666	0.8066	4.16e-18
Height	M00792	SMAD	rs34529769	0.3947	0.8177	1.13e-10
Height	M00776	SREBP	rs3828559	0.1843	0.3429	2.74e-06
Height	M01641	RFX1	rs4073154	0.0628	0.4411	2.19e-08
Height	M01114	E2F	rs4519508	0.105	0.4438	8.12e-06
Height	M01641	RFX1	rs4725984	0.1155	0.6012	2e-08
Height	M00104	CDP CR1	rs4973431	0.1841	0.6903	8.51e-07
Height	M00241	Nkx2-5	rs7466269	0.4258	0.8376	5.86e-15
Height	M00104	CDP CR1	rs894344	0.0866	0.5023	7.79e-11
Height	MA0041.1	Foxd3	rs9849338	0.3562	0.791	2.53e-14
LDL	M00359	bZIP911	rs2075375	0.2384	0.8109	1.64e-07
LDL	M01863	ATF-3	rs217381	0.2705	0.6777	7.41e-11
LDL	PBM0176	HLH-29	rs217386	0.2596	0.5864	2.13e-11
LDL	M01812	TGA2	rs2479409	0.9314	0.9979	9.7e-29
LDL	M01812	TGA2	rs267733	0.9777	0.9992	3.26e-08
LDL	M00513	ATF3	rs267733	0.9777	0.9983	3.26e-08
LDL	M00359	bZIP911	rs2954021	0.0748	0.5249	6.13e-29
LDL	M00187	USF/E-box	rs532436	0.3971	0.7711	1.8e-27
LDL	M00513	ATF3	rs6920309	0.0595	0.494	3.55e-13
LDL	MA0069.1	Pax6	rs9293637	0.1861	0.3661	2.62e-11
LDL	M00359	bZIP911	rs9438904	0.0327	0.318	6.21e-10
LSBMD	M01733	MZF1	rs11898505	0.3838	0.8157	4.86e-12
LSBMD	M01525	Put3	rs1524068	0.2181	0.8539	2.41e-15
LSBMD	M01525	Put3	rs4869741	0.0866	0.643	1.63e-19
MCH	M00235	AhR:Arnt	rs11968166	0.9267	0.9923	4.67e-34
MCH	M01770	XBP1	rs12718598	0.7329	0.9667	9.29e-09
MCH	M00942	CPRF-1	rs1800562	0.4999	0.928	1.73e-66
MCH	M01234	IPF1	rs2236496	0.9794	0.9795	1.17e-16
MCH	M00496	STAT1	rs3851296	0.0255	0.2805	1.39e-08
MCH	M01175	CKROX	rs4729597	0.9522	0.9927	4.21e-17
MCH	M00942	CPRF-1	rs56050898	0.0773	0.5227	1.23e-07
MCH	M00513	ATF3	rs6568571	0.2151	0.4233	5.52e-26
MCH	M00235	AhR:Arnt	rs7664687	0.0299	0.236	1.42e-06
MCH	M00496	STAT1	rs869785	0.3464	0.8891	1.87e-14
MCH	MA0093.1	USF1	rs911910	0.182	0.5454	6.42e-07
MCH	M01770	XBP1	rs9660992	0.0685	0.4665	3.54e-10
MCHC	M01641	RFX1	rs11240734	0.2396	0.5485	5.91e-12
MCHC	M01658	AML1	rs12733102	0.3623	0.8985	3.22e-06
MCHC	M00986	Churchill	rs198846	0.9994	0.9999	3.73e-21
MCHC	M01030	Rim101p	rs4737009	0.369	0.804	2.43e-11
MCHC	M00345	GAMYB	rs4737010	0.4851	0.9013	2.14e-11
MCHC	M01658	AML1	rs9389268	0.2416	0.8496	9.6e-15
MCV	M01641	RFX1	rs10901252	0.1105	0.5953	4.06e-08
MCV	M01641	RFX1	rs11240734	0.5864	0.9445	2.22e-09
MCV	M00017	ATF	rs12718597	0.0883	0.5035	2.38e-13
MCV	M01770	XBP1	rs12718598	0.5803	0.9573	3.35e-14
MCV	M00942	CPRF-1	rs1800562	0.8678	0.9841	7.75e-47
MCV	M00496	STAT1	rs3851296	0.0945	0.7763	1.59e-08
MCV	M01175	CKROX	rs4729597	0.8192	0.9681	6.97e-15
MCV	M00942	CPRF-1	rs56050898	0.0558	0.3465	1.75e-06
MCV	M01863	ATF-3	rs6568571	0.5065	0.8577	8.07e-23
MCV	M01055	NAC69-1	rs6656196	0.4925	0.8656	1.46e-08
MCV	M01223	P50:P50	rs6730558	0.4072	0.8344	1.06e-06
MCV	M01197	ELF5	rs7022455	0.3546	0.8136	1.93e-07
MCV	M00041	ATF2:c-Jun	rs72667750	0.0494	0.2991	2.71e-06
MCV	M00496	STAT1	rs869785	0.3501	0.9456	4.83e-15
MCV	M01065	ABZ1	rs911910	0.2084	0.7617	1.07e-08
MCV	M01770	XBP1	rs9660992	0.2968	0.8784	5.18e-10
PCV	M00262	Staf	rs1934661	0.2199	0.5262	3.95e-07
PCV	M00187	USF/E-box	rs532436	0.4485	0.8706	7.48e-18
PLT	M00171	Adf-1	rs149290349	0.4414	0.8479	5.33e-09
PLT	M01814	AML2	rs17030845	0.277	0.6496	6.34e-11
PLT	M00178	CREB	rs2336384	0.1062	0.5901	6.24e-09
PLT	M01492	Ynr063w	rs34592828	0.1358	0.2124	1.12e-08
PLT	M00739	E2F-4:DP-2	rs4731120	0.9853	0.998	1.38e-12
PLT	M00178	CREB	rs540909	0.2168	0.7814	3.99e-07
PLT	M01784	UPC2	rs6141	0.6676	0.9428	3.09e-08
PLT	M01653	HMGIY	rs9399137	0.9999	1	2.52e-47
RBC	M01797	SIRT6	rs10758656	0.7906	0.9607	3.79e-10
RBC	M00694	E4F1	rs12718598	0.4699	0.8635	3.04e-09
RBC	M01709	MAFA	rs13027161	0.6889	0.9273	3.53e-13
RBC	M00261	Olf-1	rs1434282	0.7906	0.9632	7.39e-09
RBC	M00262	Staf	rs1934661	0.4217	0.8423	4.51e-07
RBC	M00942	CPRF-1	rs532436	0.1135	0.2315	2.35e-21
RBC	M00694	E4F1	rs73019748	0.0875	0.4202	1.14e-06
TC	M01636	STB4	rs1556857	0.0666	0.4787	1.19e-10
TC	M00942	CPRF-1	rs1800562	0.9249	0.9946	1.24e-08
TC	M01636	STB4	rs2235215	0.6764	0.9655	2.79e-10
TC	M01812	TGA2	rs2479409	0.9696	0.9967	1.91e-24
TC	M00942	CPRF-1	rs532436	0.4694	0.9313	6.63e-26
TC	M00187	USF/E-box	rs532436	0.4694	0.8359	6.63e-26
TC	M01636	STB4	rs553427	0.032	0.3031	2.64e-12
TG	M01617	ZMS1	rs13173241	0.1691	0.2924	2.58e-10
TG	M00486	Pax-2	rs2270924	0.259	0.5997	2.51e-11
TG	M01848	TCP15	rs7789194	0.2586	0.6452	1.38e-07
TG	M01204	SPI-B	rs9686661	0.6413	0.951	6.59e-11
