# Supplementary material for: Which Genetics Variants in DNase-Seq Footprints Are More Likely to Alter Binding?
Source: PLOS journal article supplement (doi:10.1371/journal.pgen.1005875), 2016-02-22
Supplement: S22 (10.1371/journal.pgen.1005875.s022) [file journal.pgen.1005875.s022]

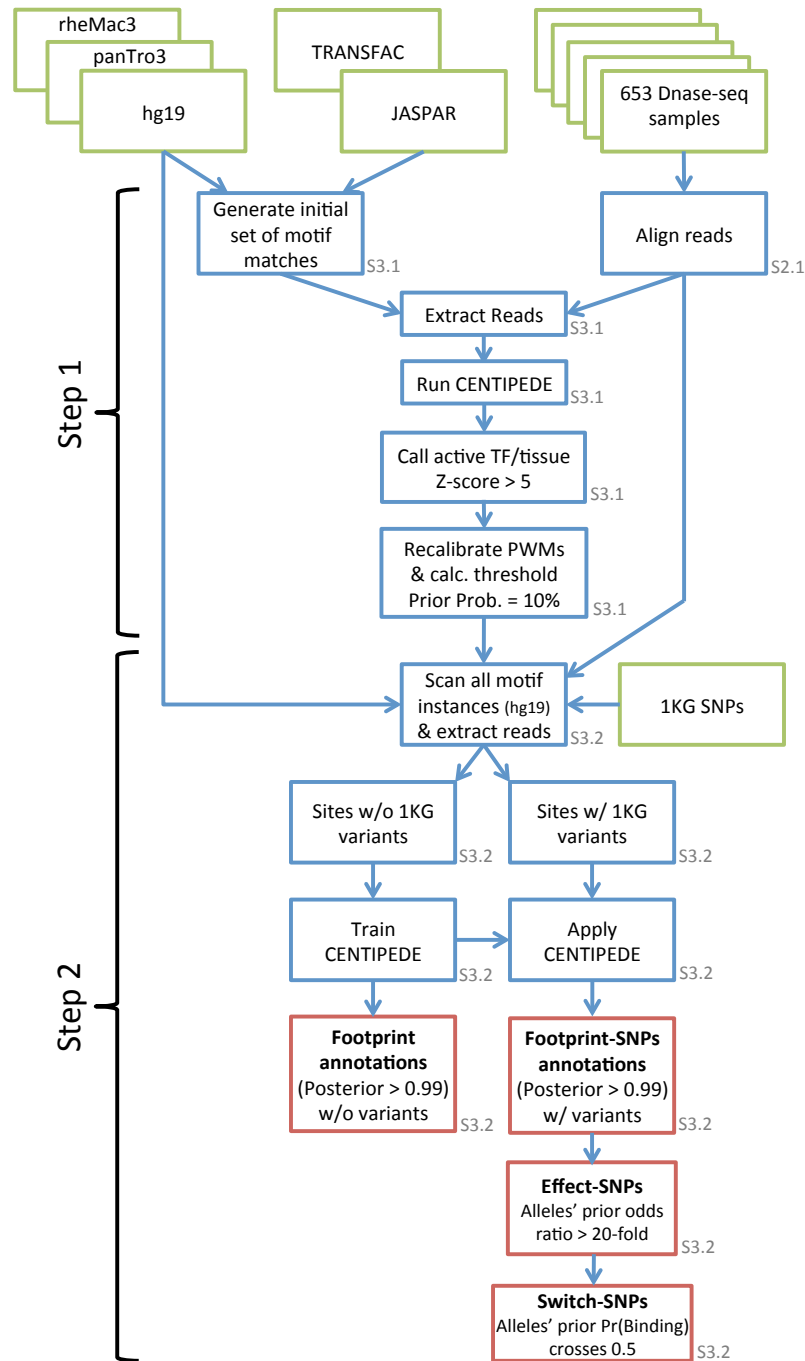

Figure S1: Flowchart detailing steps of the CENTIPEDE-based annotation of regulatory regions and variants. Numbers next to boxes refer to the corresponding section in the Supplement.
