# Supplementary material for: Which Genetics Variants in DNase-Seq Footprints Are More Likely to Alter Binding?
Source: PLOS journal article supplement (doi:10.1371/journal.pgen.1005875), 2016-02-22
Supplement: S32 (10.1371/journal.pgen.1005875.s032) [file journal.pgen.1005875.s032]

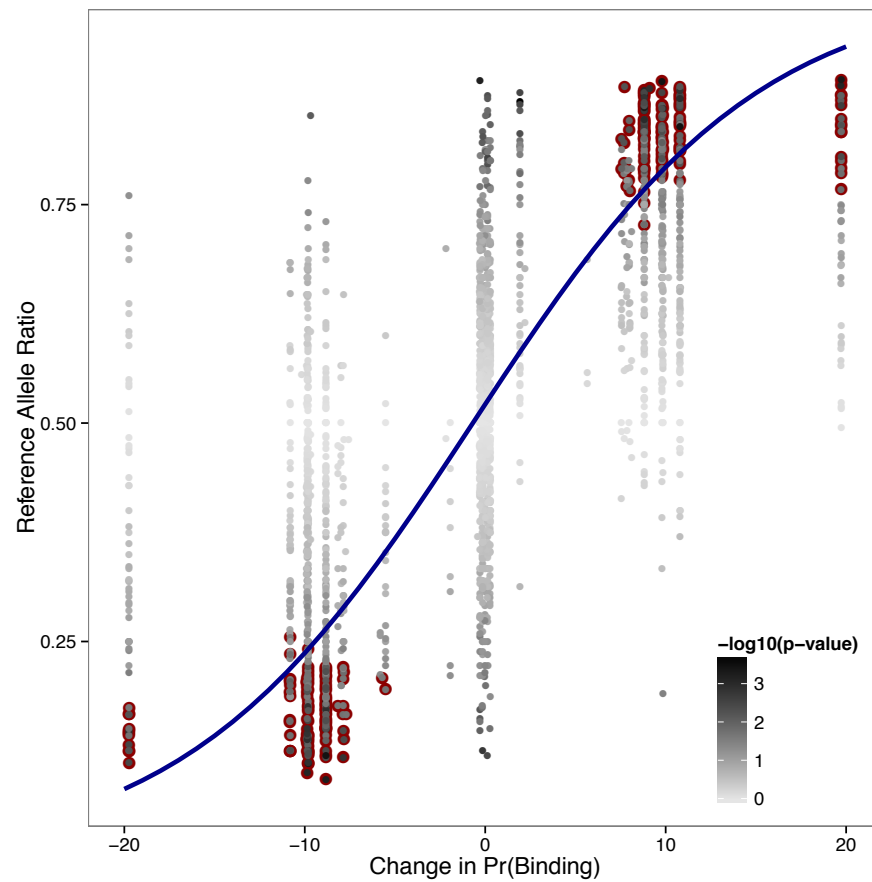

Figure S11: **Correlation between CENTIPEDE predictions and observed ASH.** SNPs identified in both the CENTIPEDE and ASH analysis are shown, shaded by p-value of allelic imbalance from QuASAR. Points circled in red display significant ASH at 20% FDR. The blue line is a logistic curve fit using points with a  $p < 0.1$ .
