# Supplementary material for: Which Genetics Variants in DNase-Seq Footprints Are More Likely to Alter Binding?
Source: PLOS journal article supplement (doi:10.1371/journal.pgen.1005875), 2016-02-22
Supplement: S43 (10.1371/journal.pgen.1005875.s043) [file journal.pgen.1005875.s043]

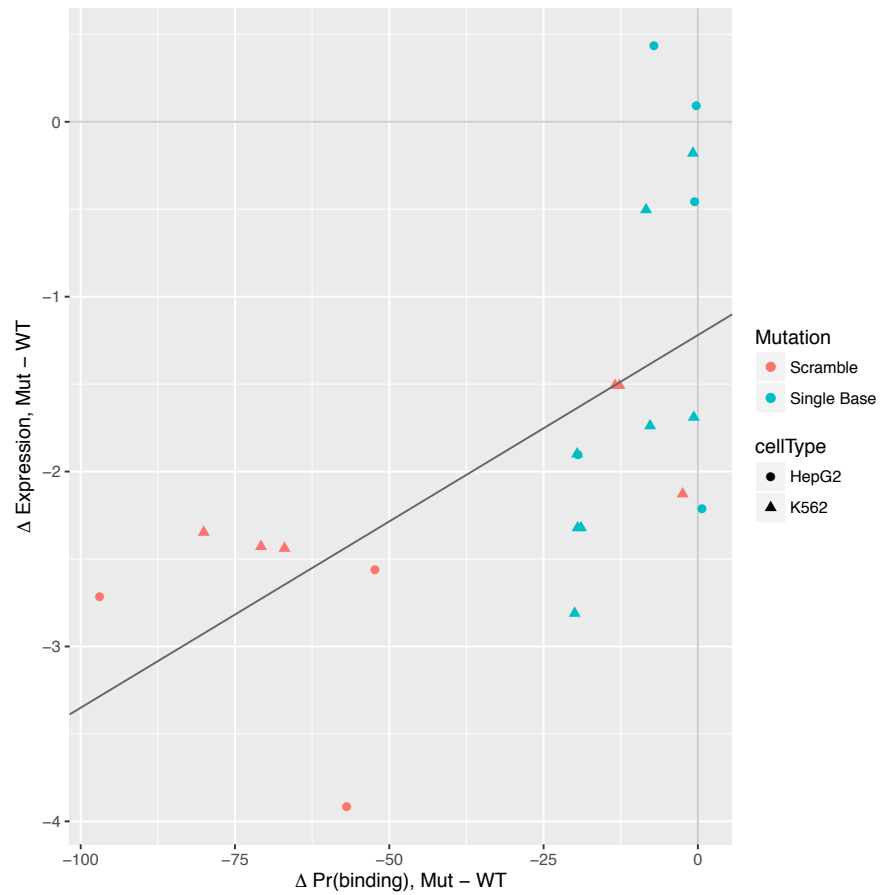

**Figure S22: Correlation of CENTIPEDE predictions and mutated enhancers in HepG2 and K562 cells.** For each point, plotted is the difference in the change in probability of binding (mutated prior log ratio - reference prior log ratio, x-axis) versus the  $\log_2$ ( fold change ) between mutated and wild type reporter constructs expression (y-axis). The black line represents the best-fit line from a linear model fit on all 22 points.
